# Supplementary material for: Validation of an updated Associative Transcriptomics platform for the polyploid crop species Brassica napus by dissection of the genetic architecture of erucic acid and tocopherol isoform variation in seeds
Source: PubMed Central journal article supplement (PMC5767744; doi:10.1111/tpj.13767), 2017-12-02

Pairwise LD in  $r^2$  with 1178 SNPs in A01 cds range 5\_to\_5594 out of 5594

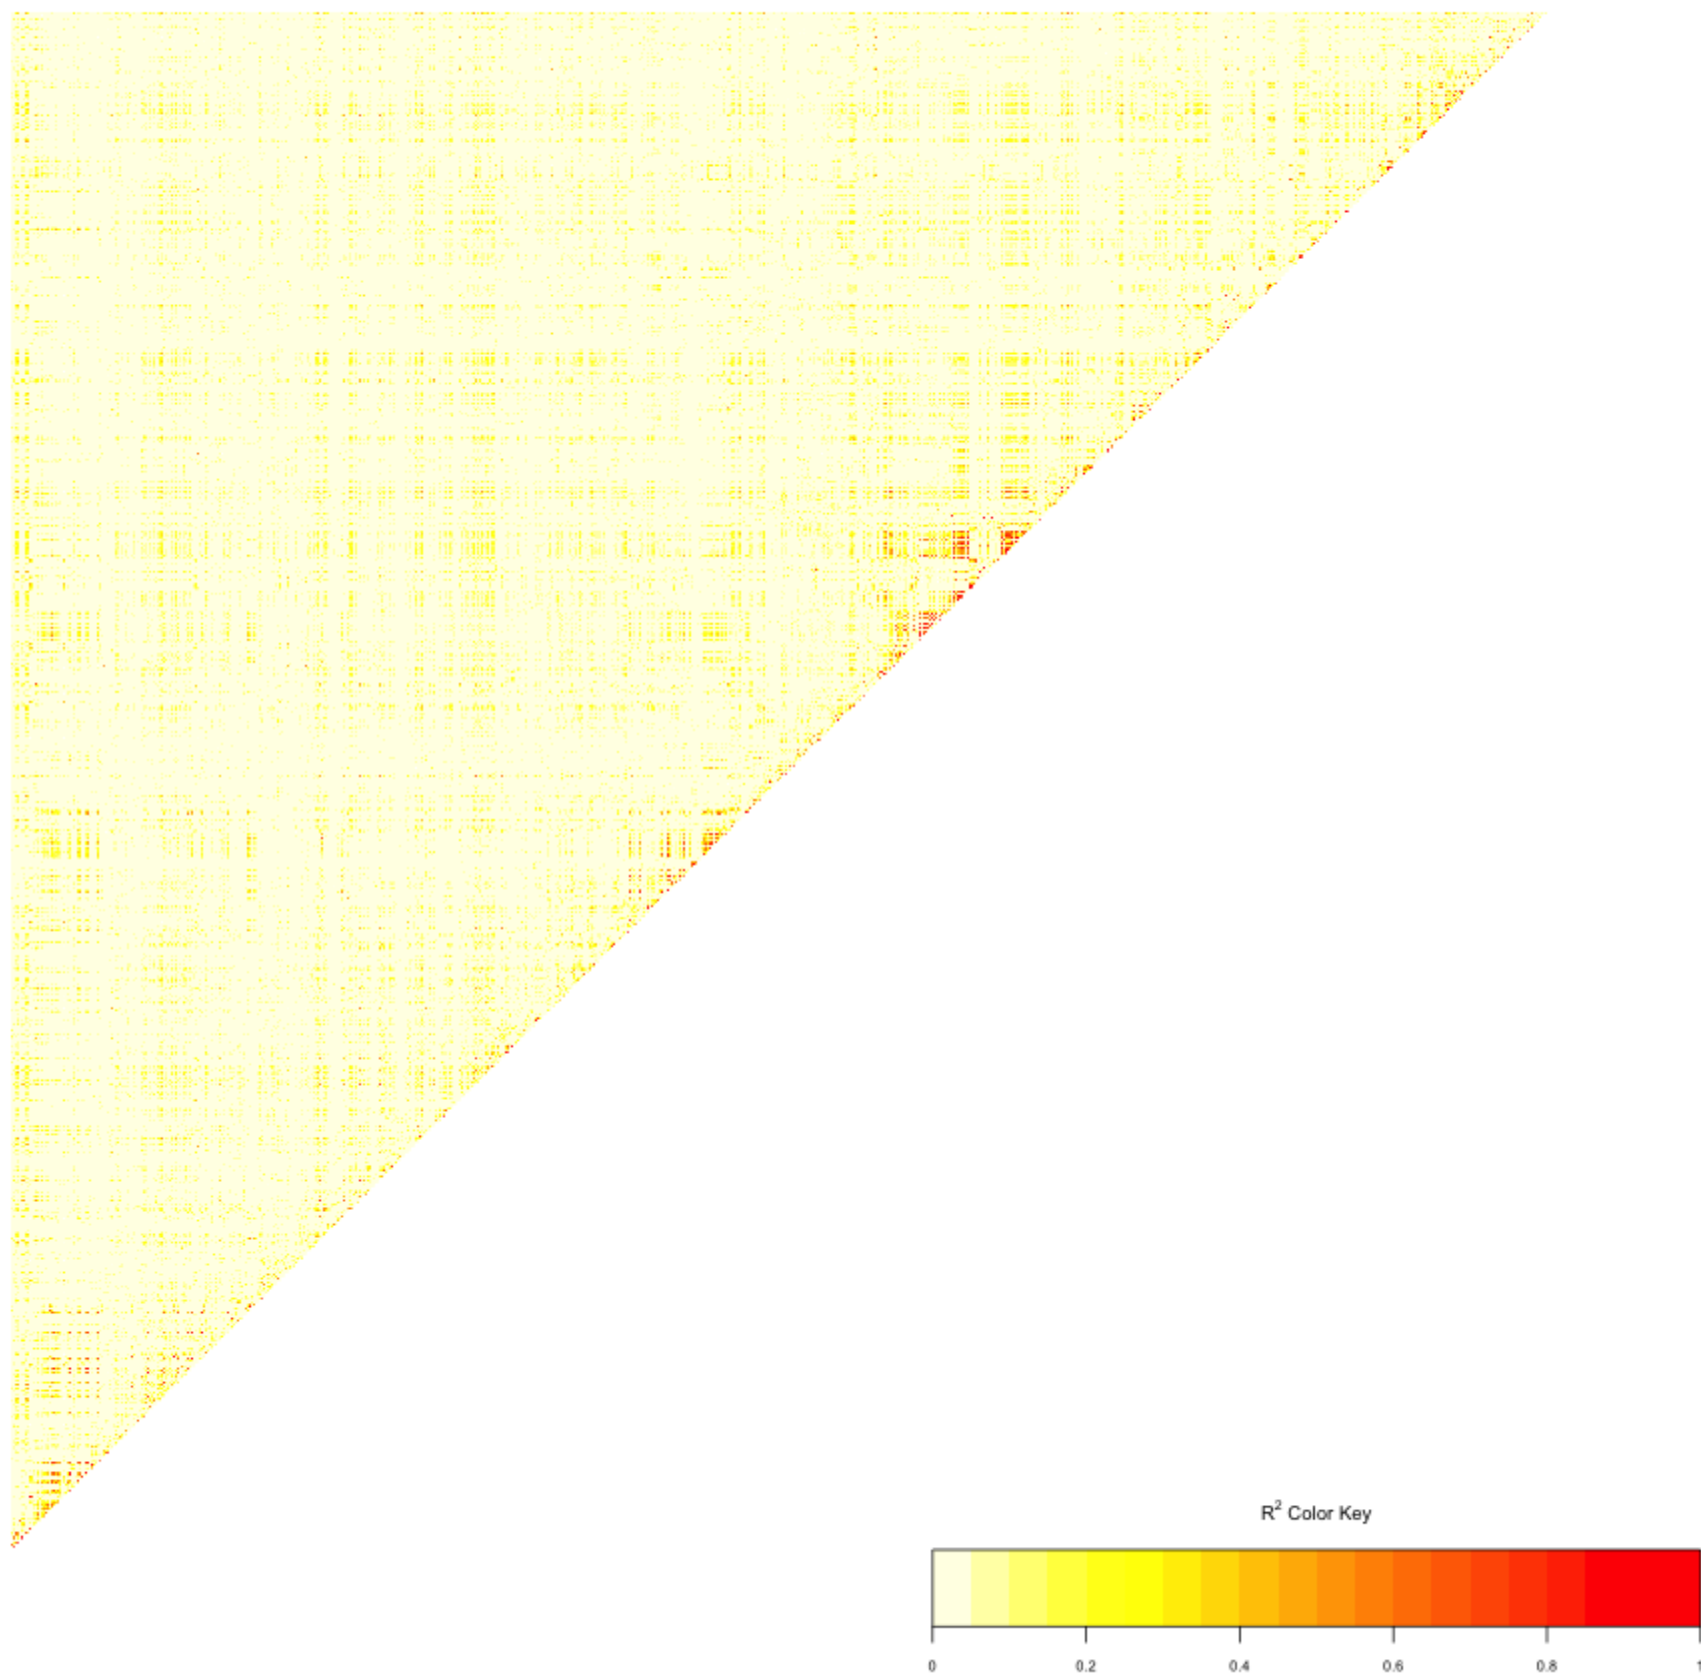

Pairwise LD in  $r^2$  with 1085 SNPs in A02 cds range 6\_to\_5534 out of 5536

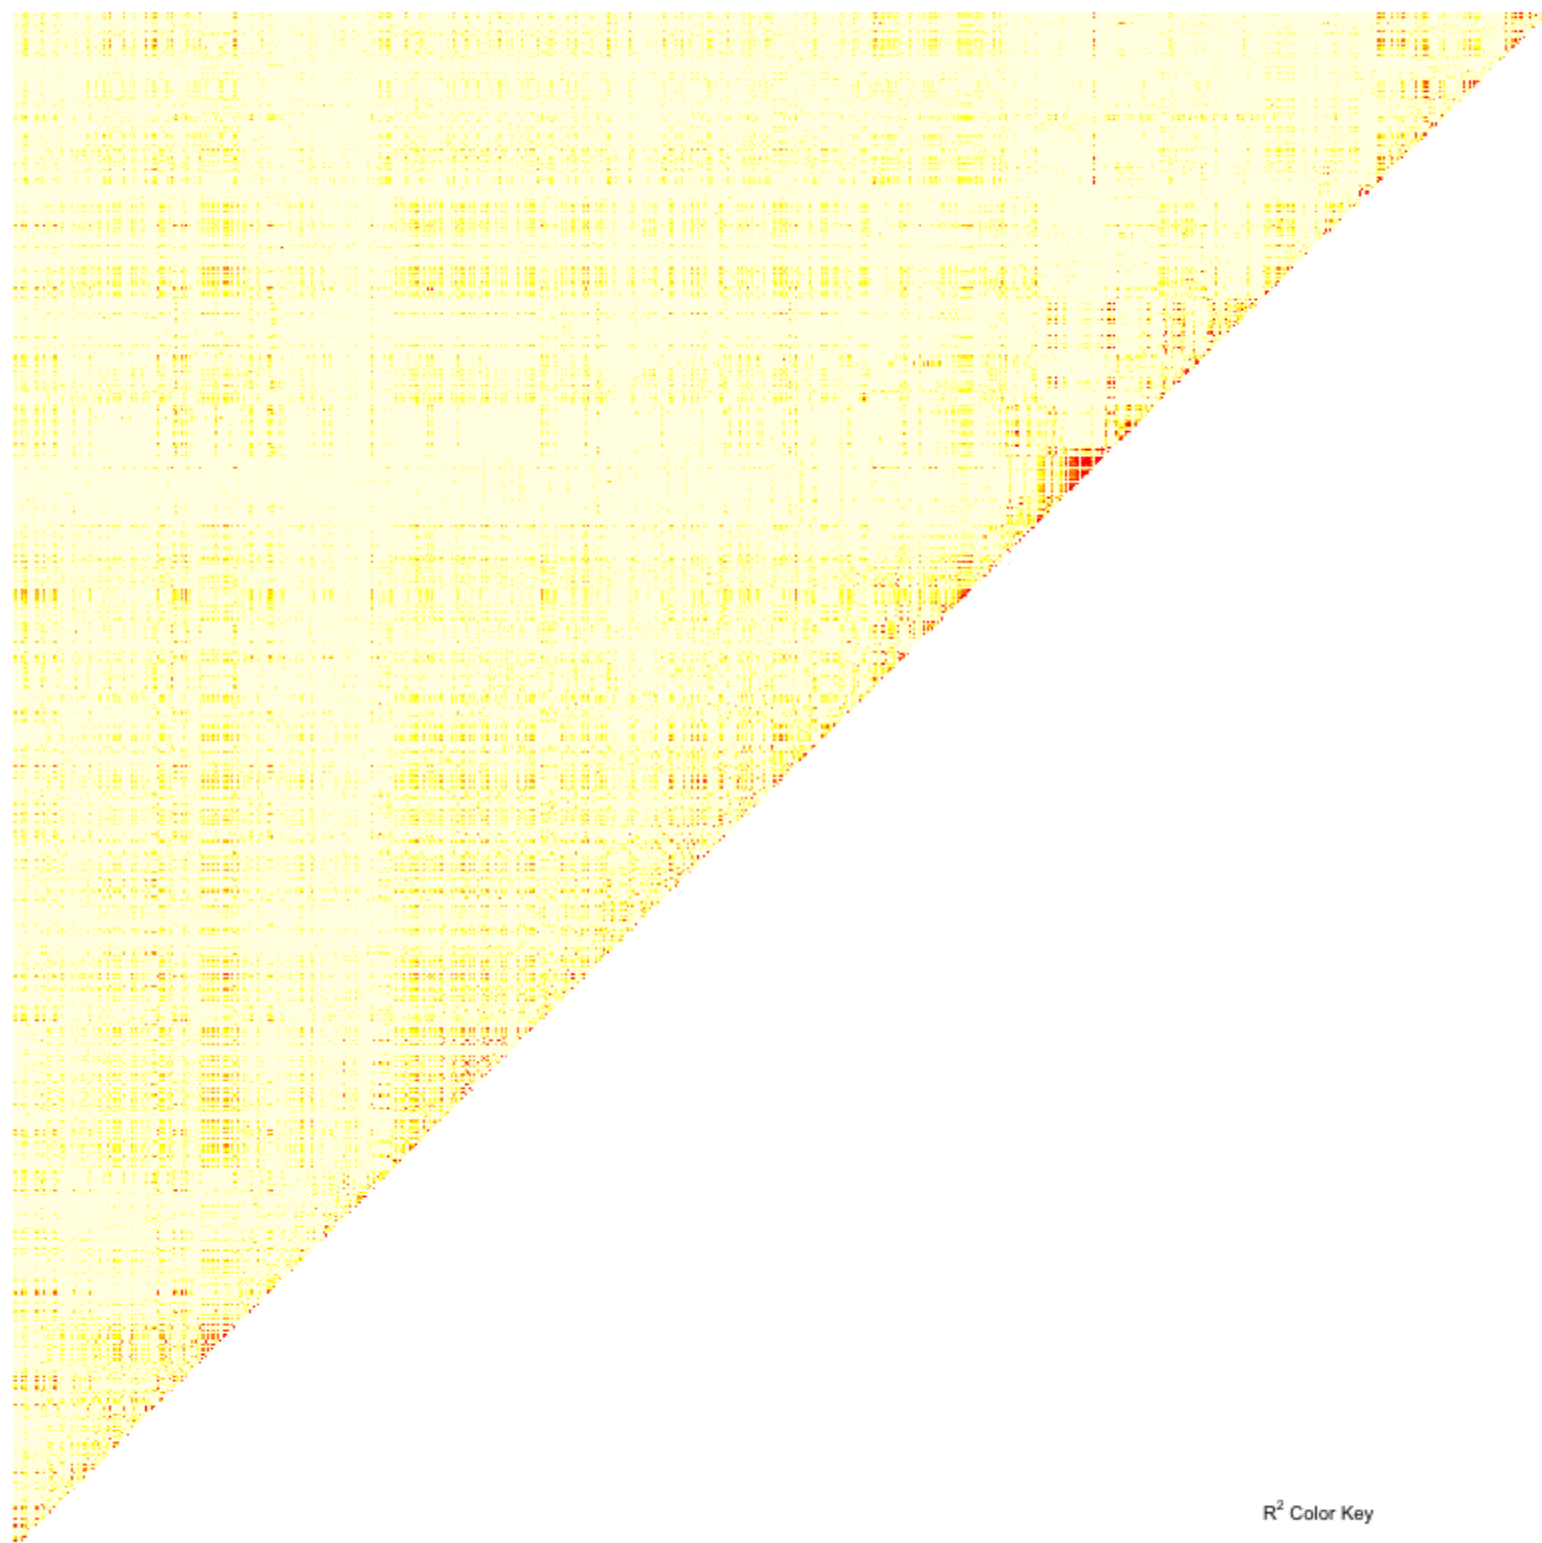

$R^2$  Color Key

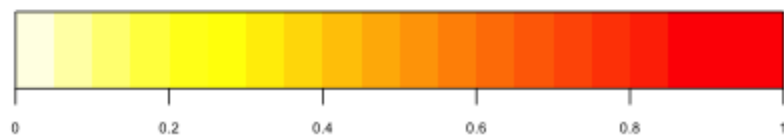

Pairwise LD in  $r^2$  with 1759 SNPs in A03 cds range 5\_to\_6773 out of 6839

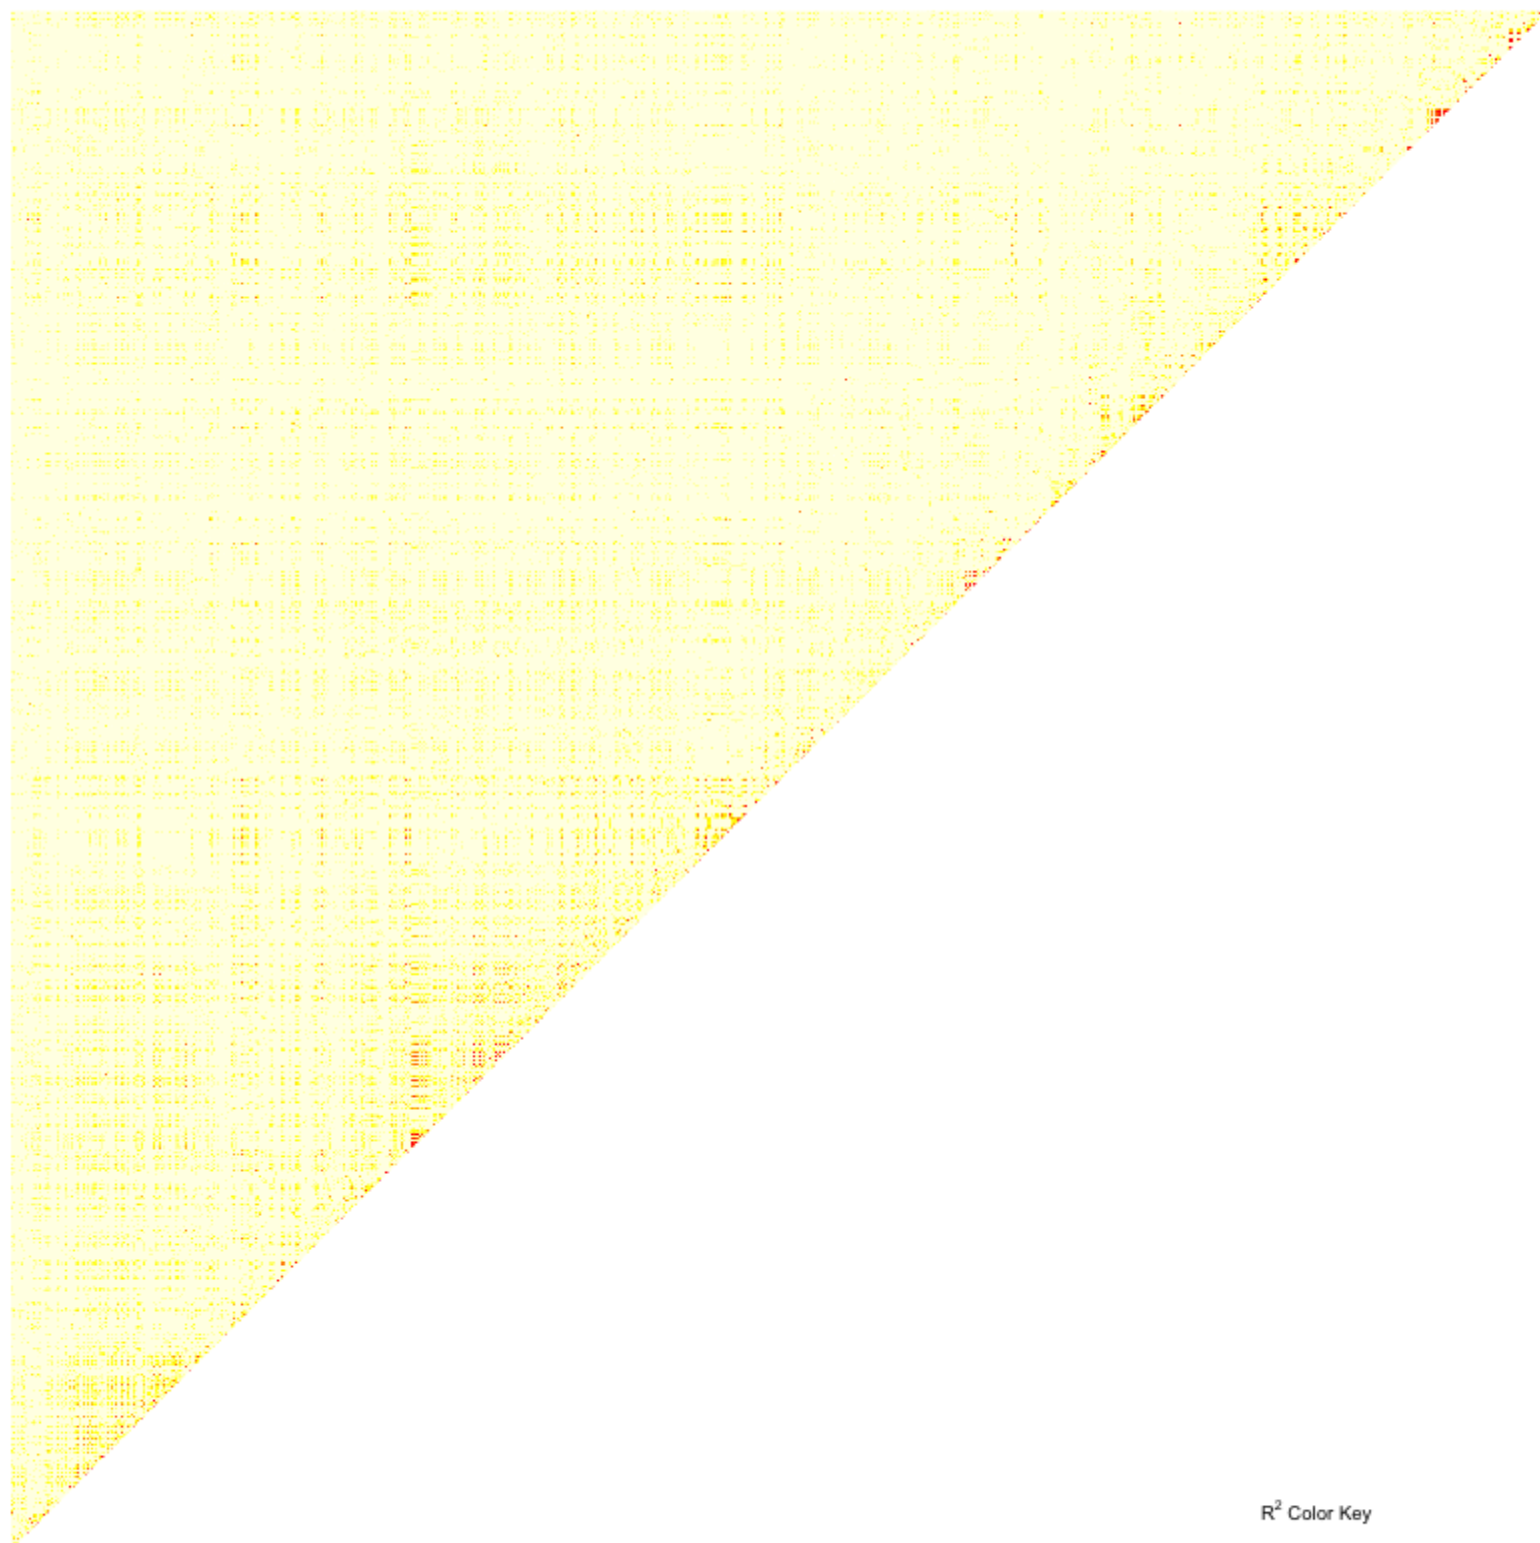

$R^2$  Color Key

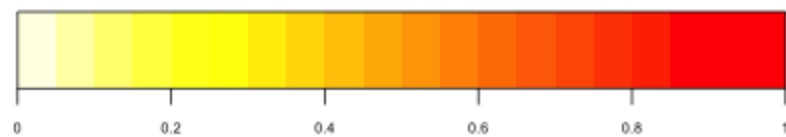

Pairwise LD in  $r^2$  with 847 SNPs in A04 cds range 3\_to\_3805 out of 3810

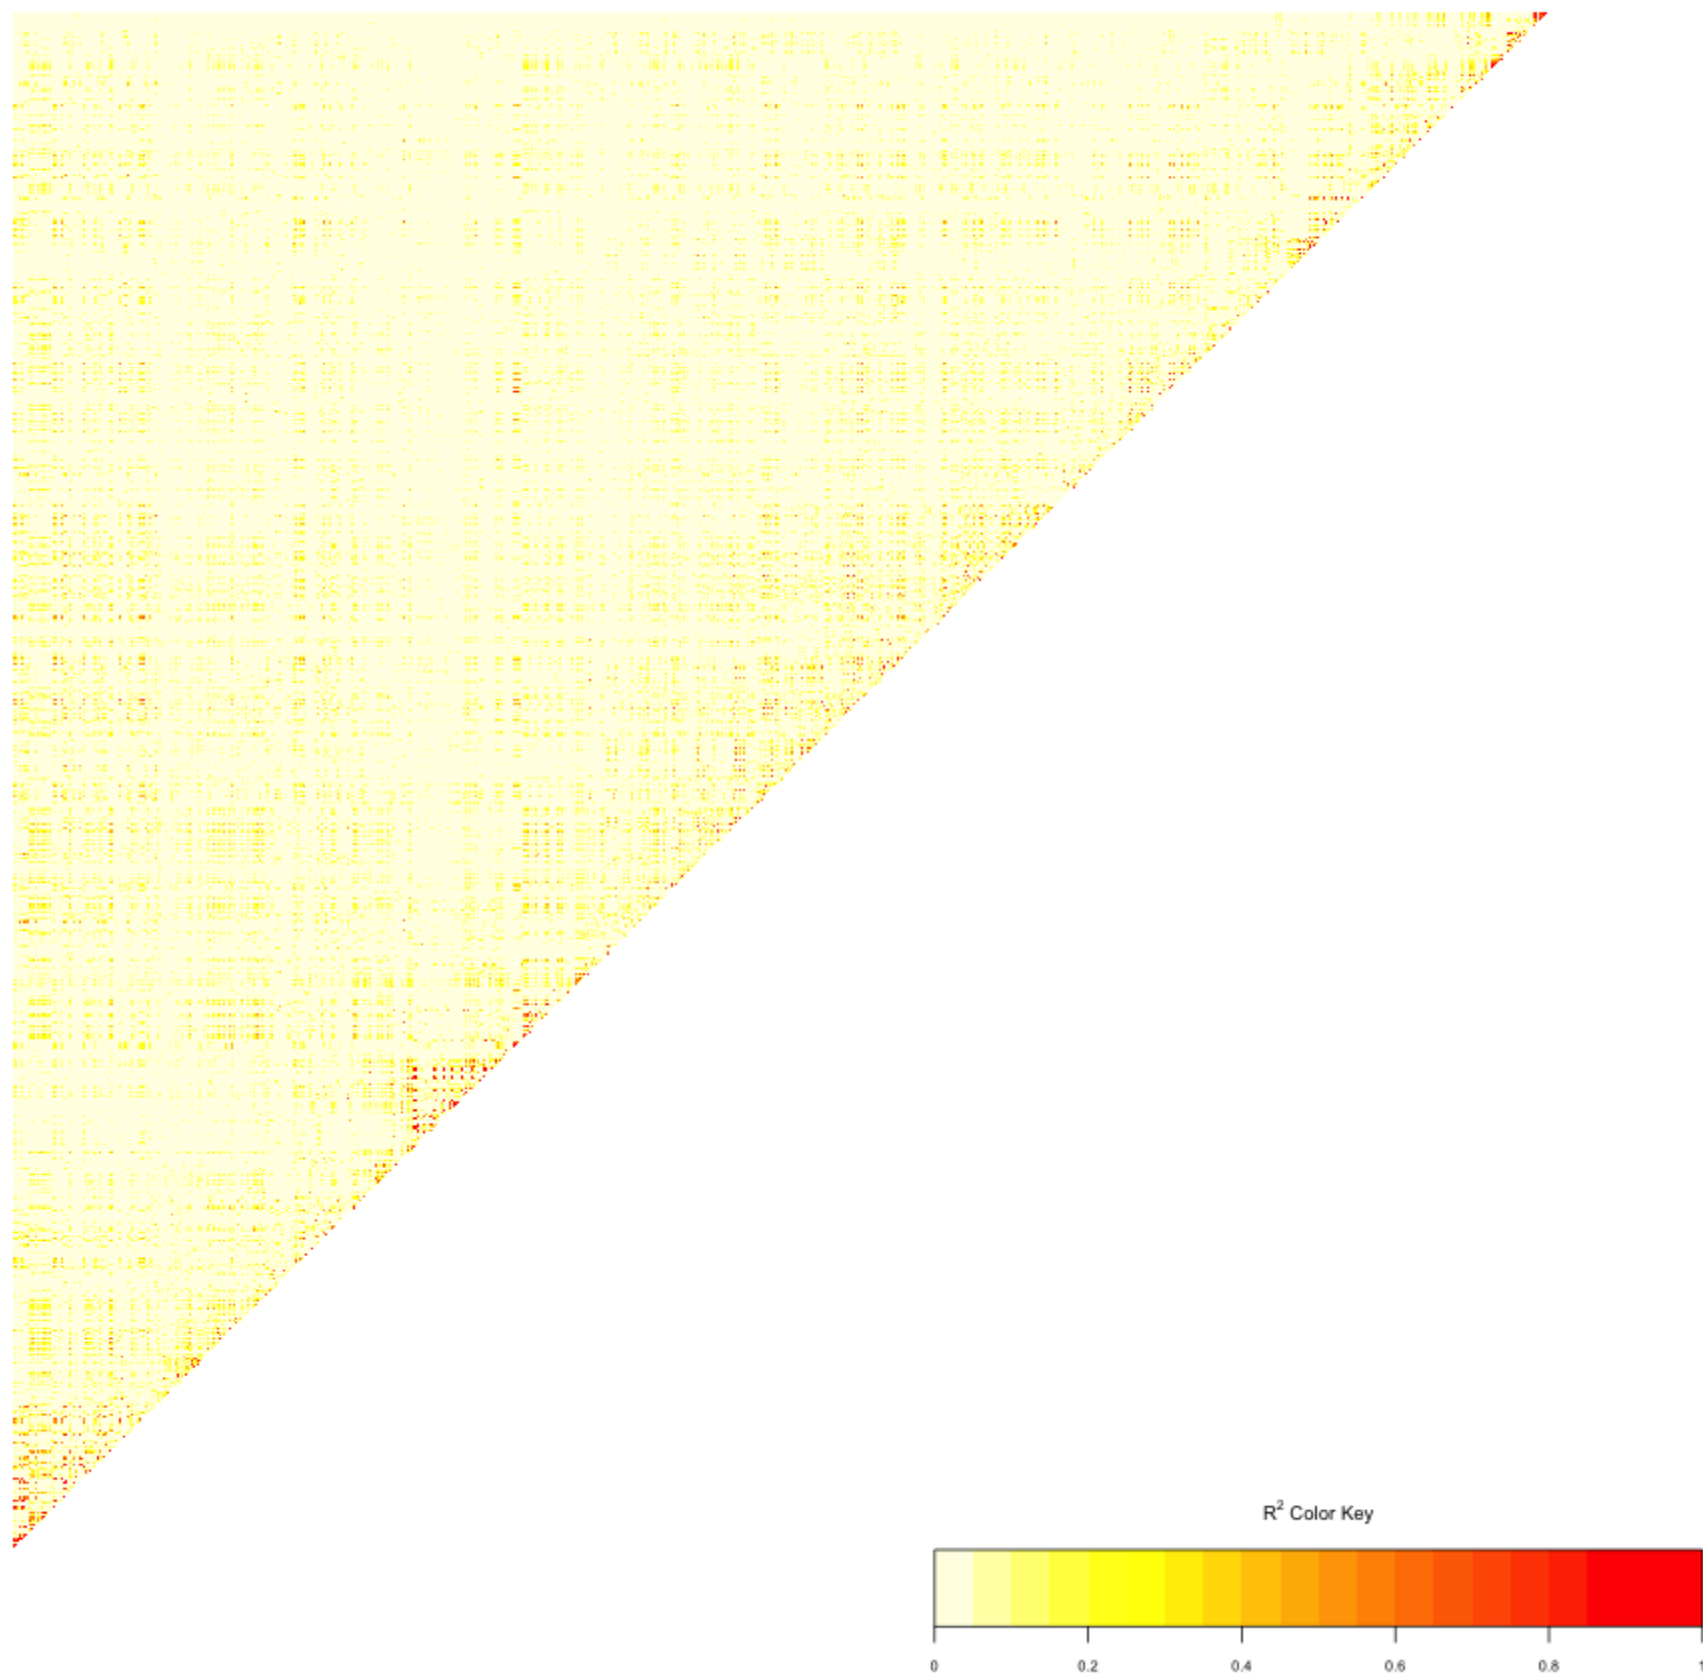

Pairwise LD in  $r^2$  with 1162 SNPs in A05 cds range 9\_to\_4856 out of 4857

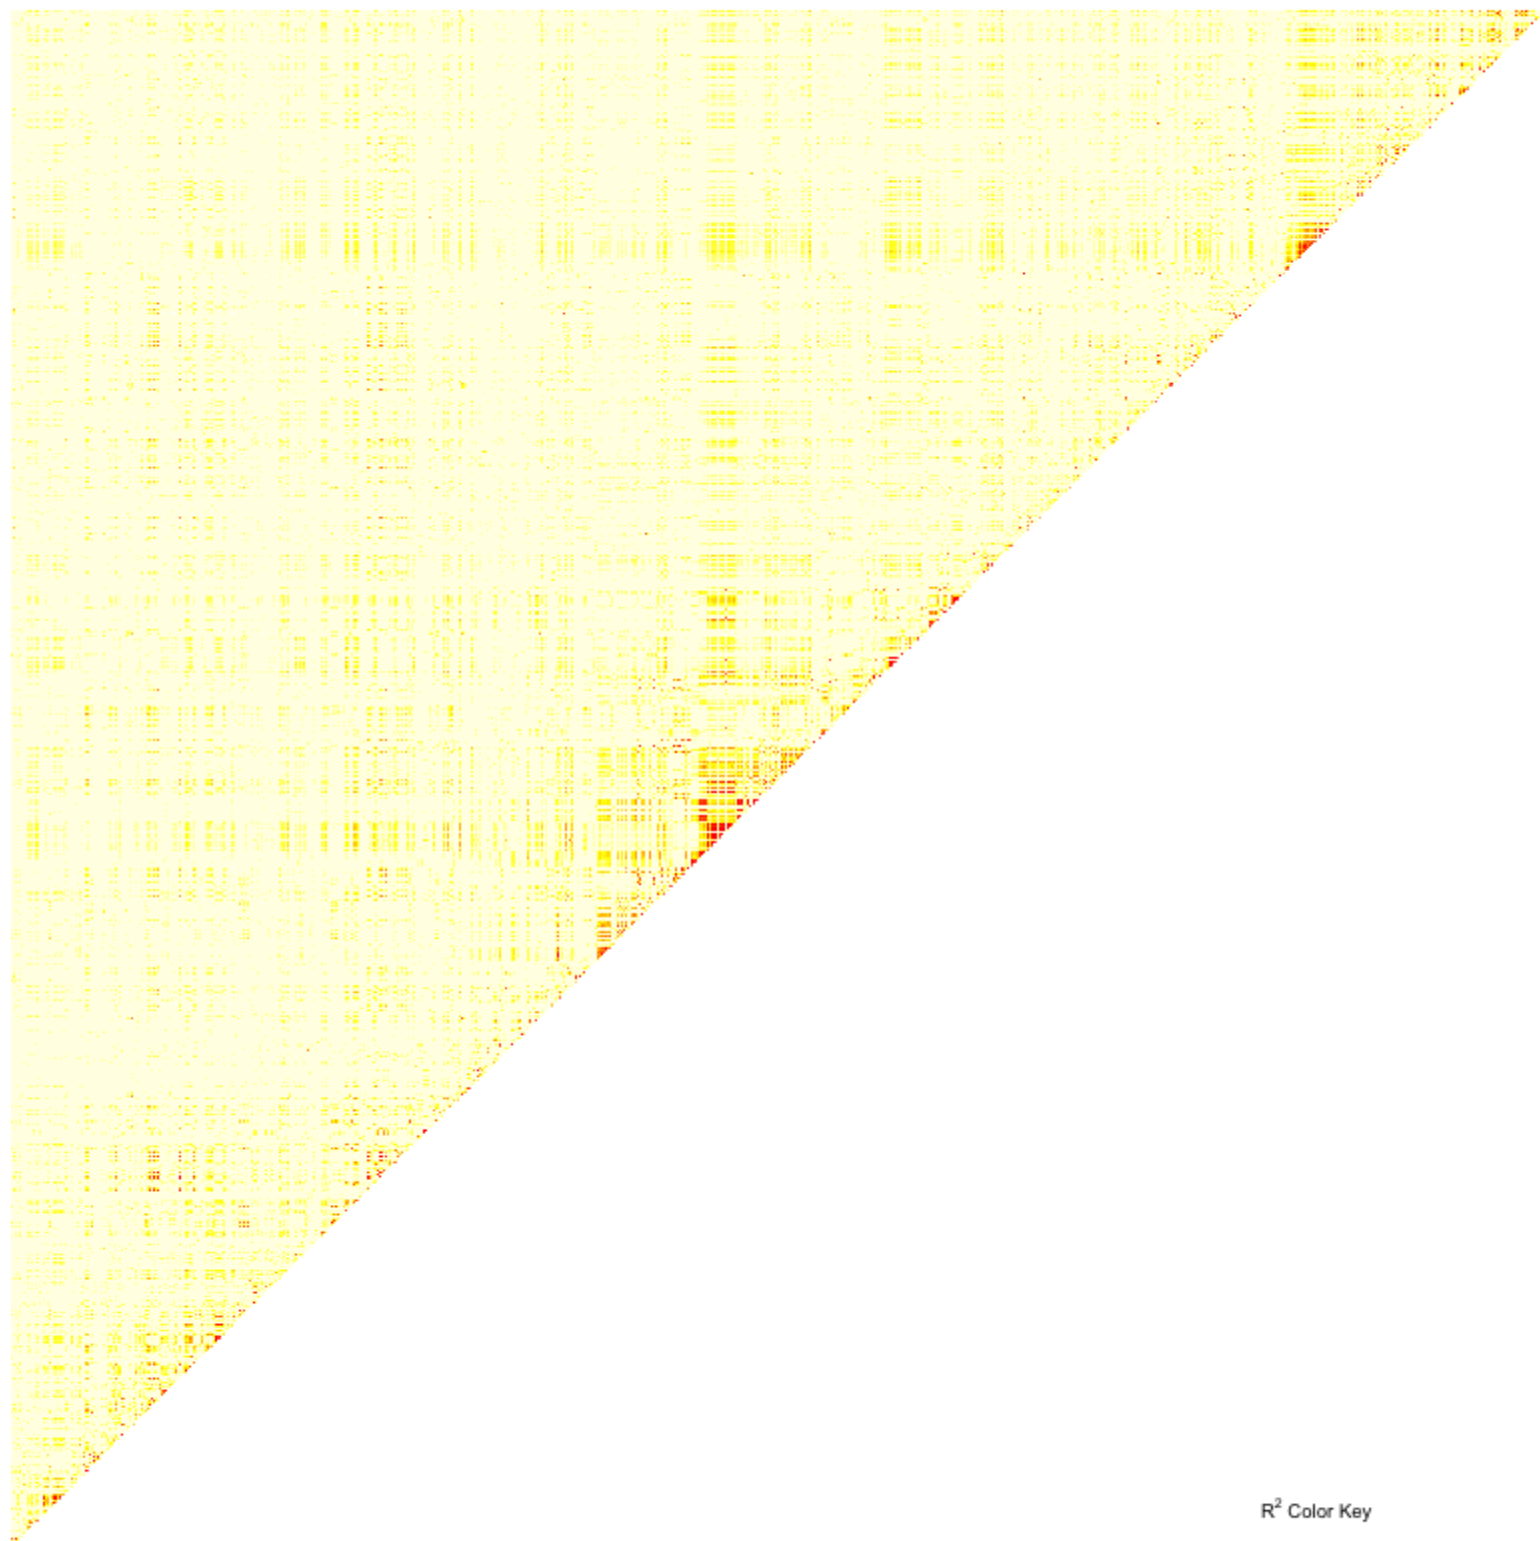

$R^2$  Color Key



Pairwise LD in  $r^2$  with 1301 SNPs in A06 cds range 15\_to\_5230 out of 5234

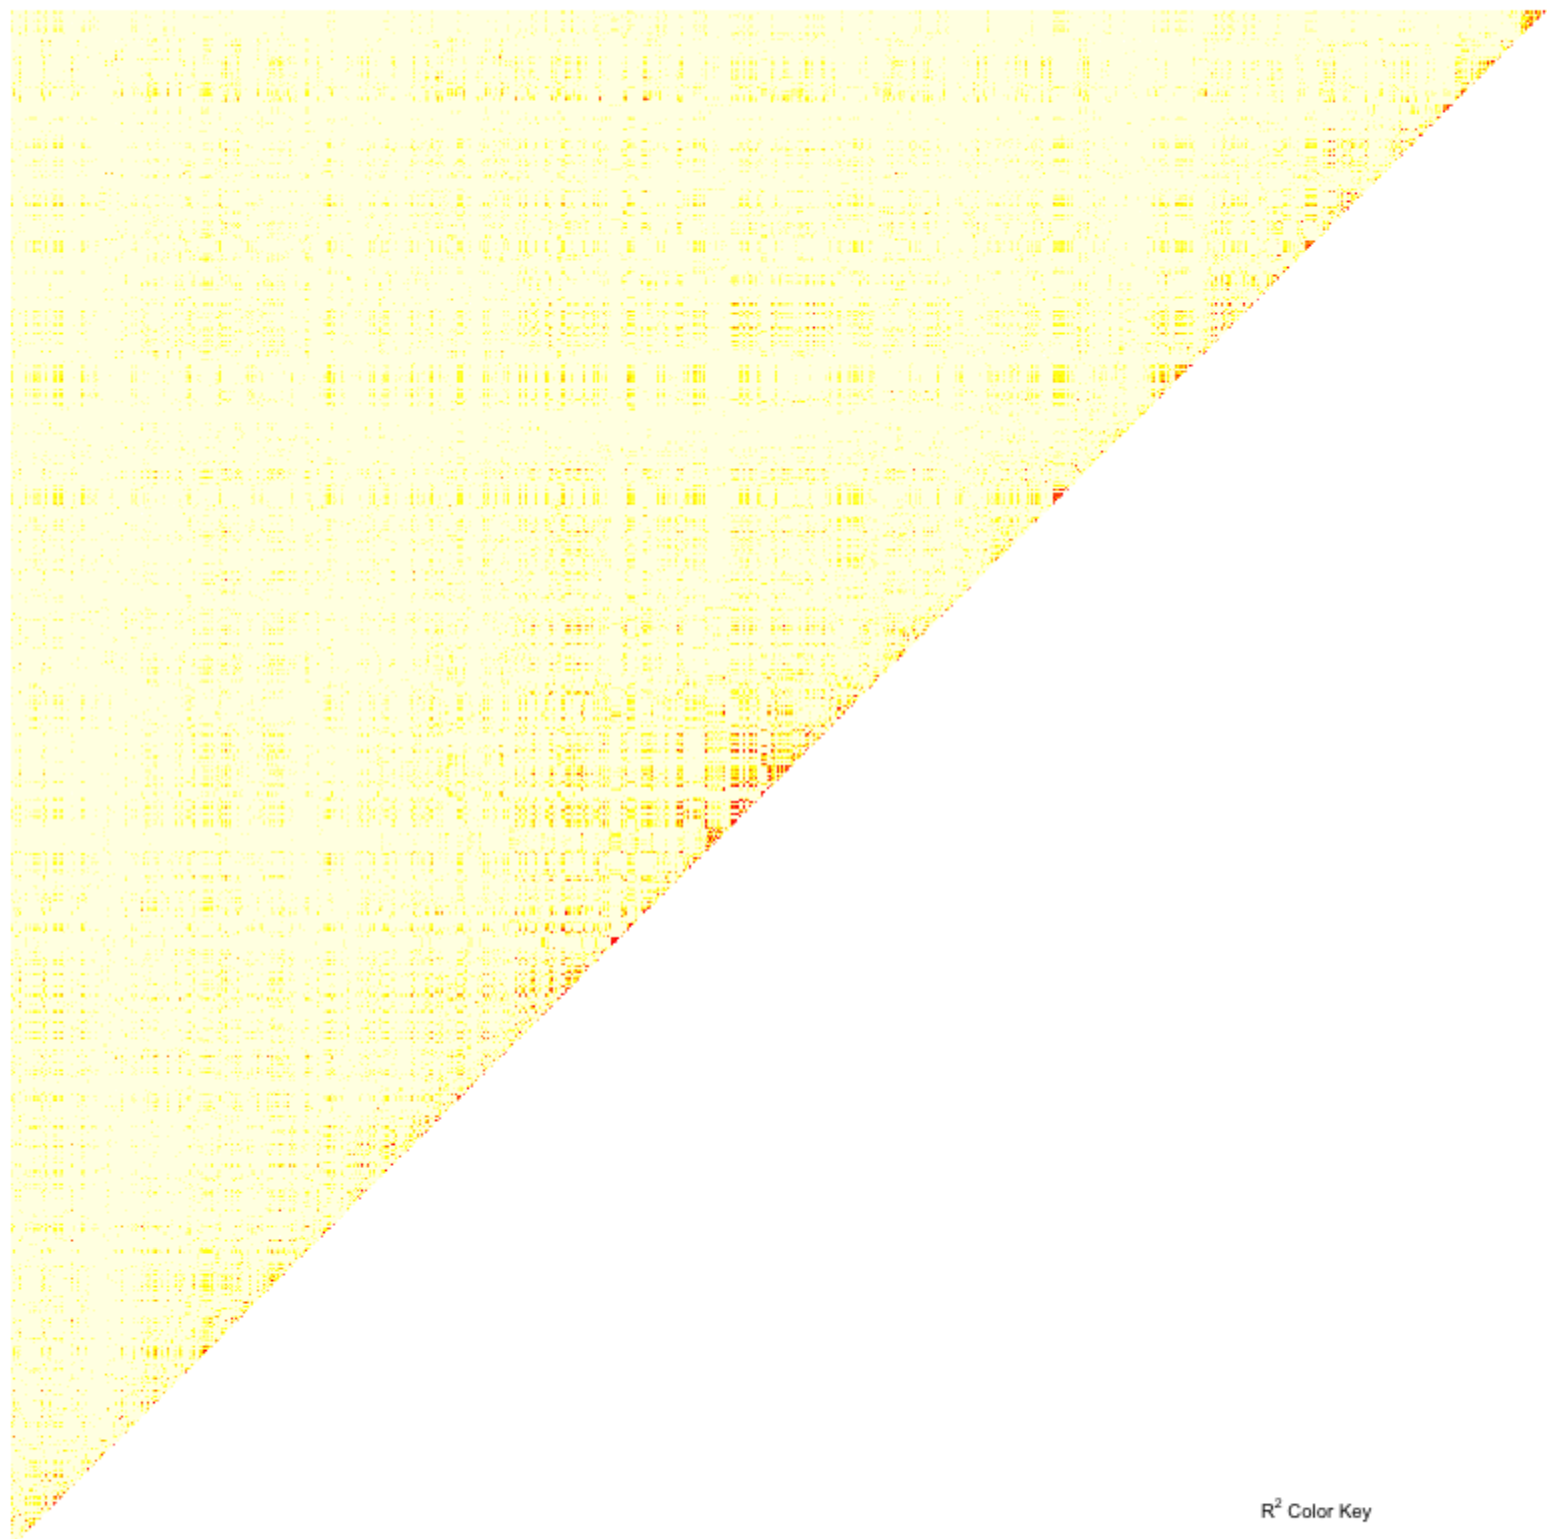

$R^2$  Color Key

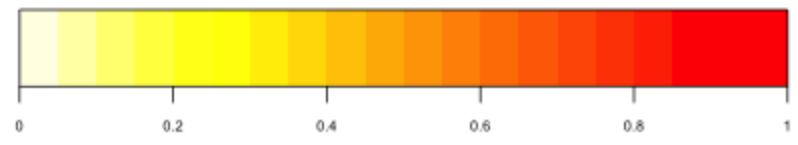



Pairwise LD in  $r^2$  with 1144 SNPs in A07 cds range 12\_to\_4916 out of 4922

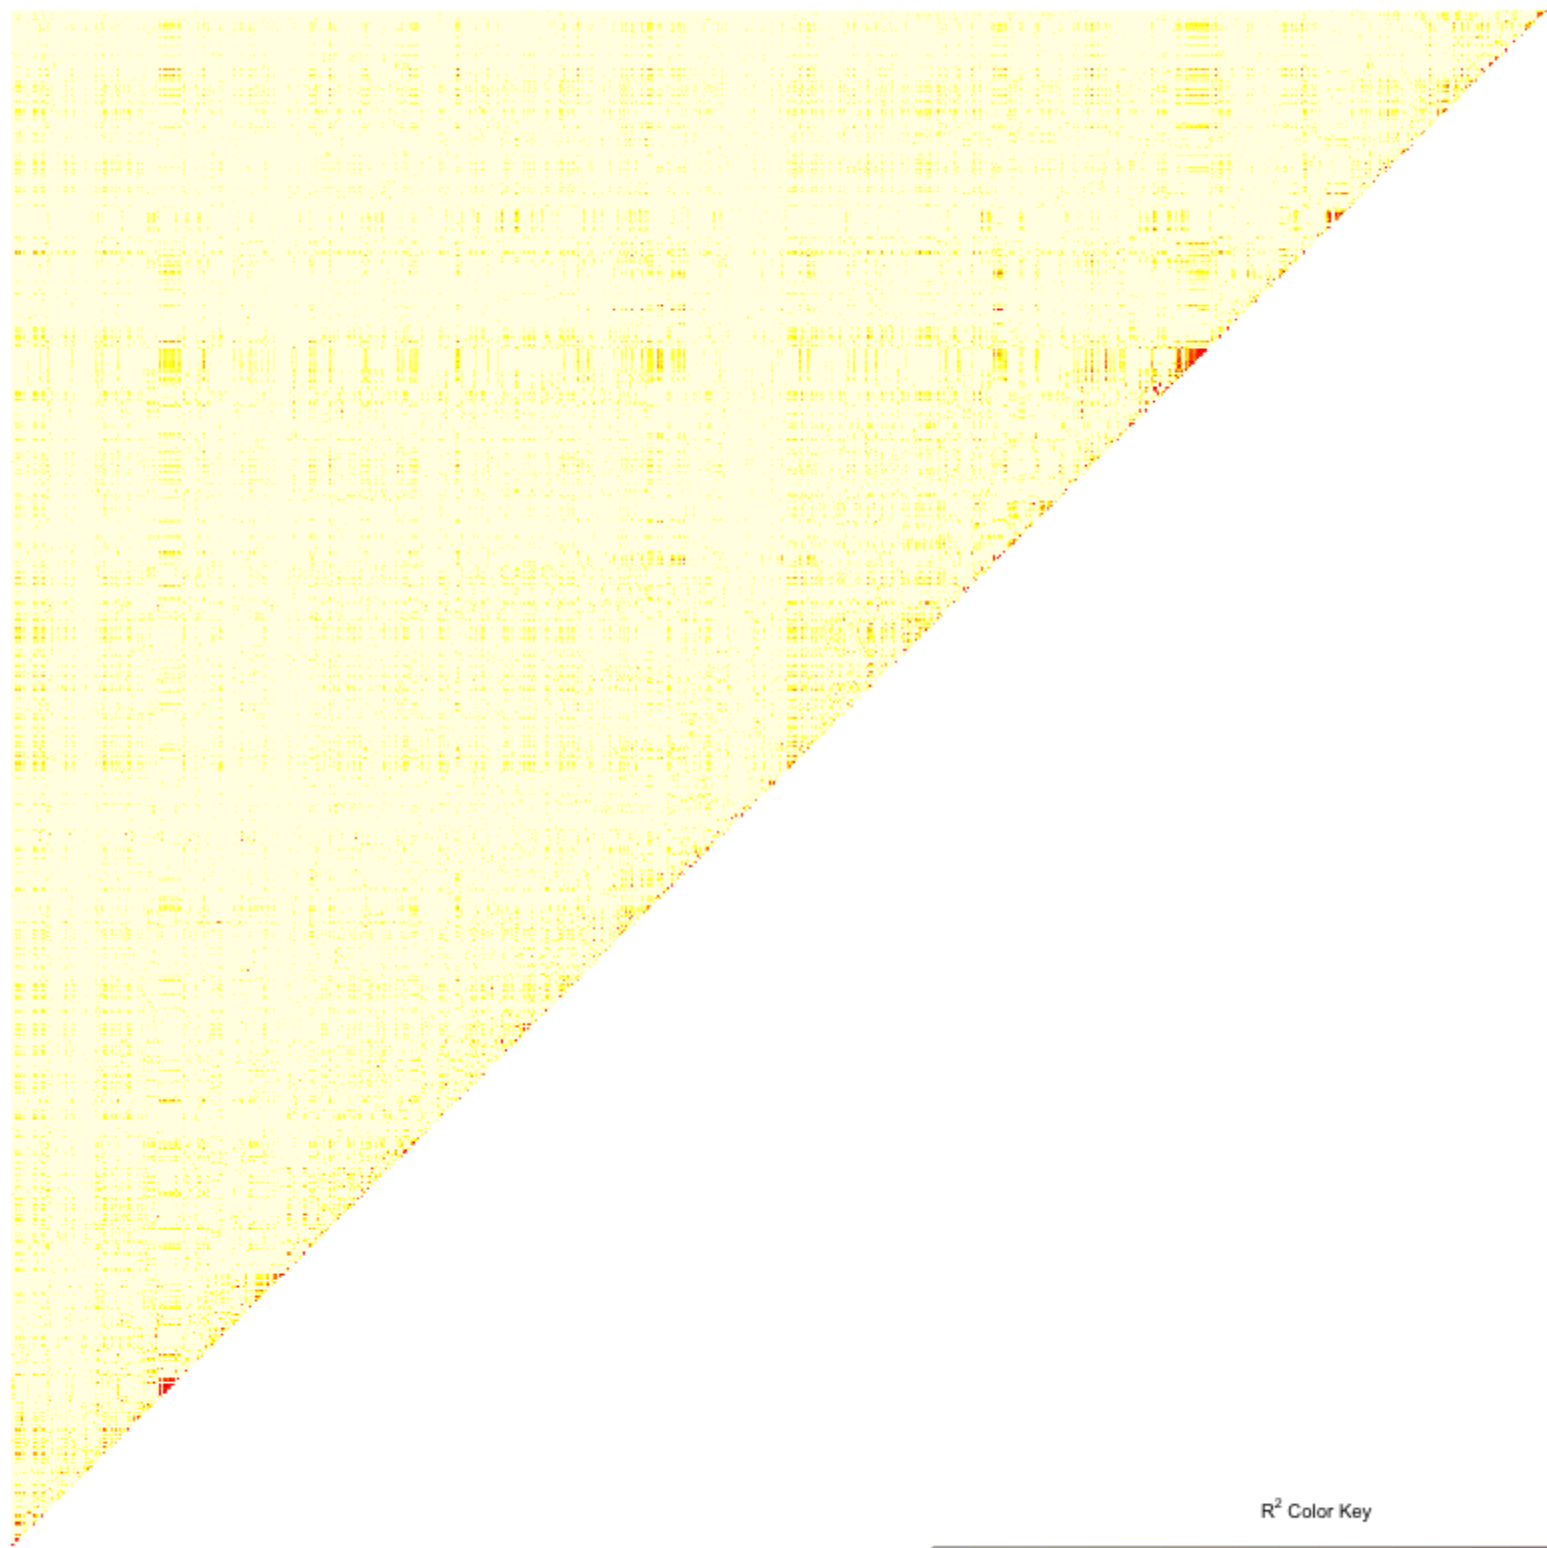

$R^2$  Color Key

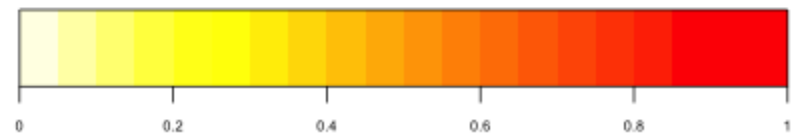

Pairwise LD in  $r^2$  with 905 SNPs in A08 cds range 3\_to\_4265 out of 4268

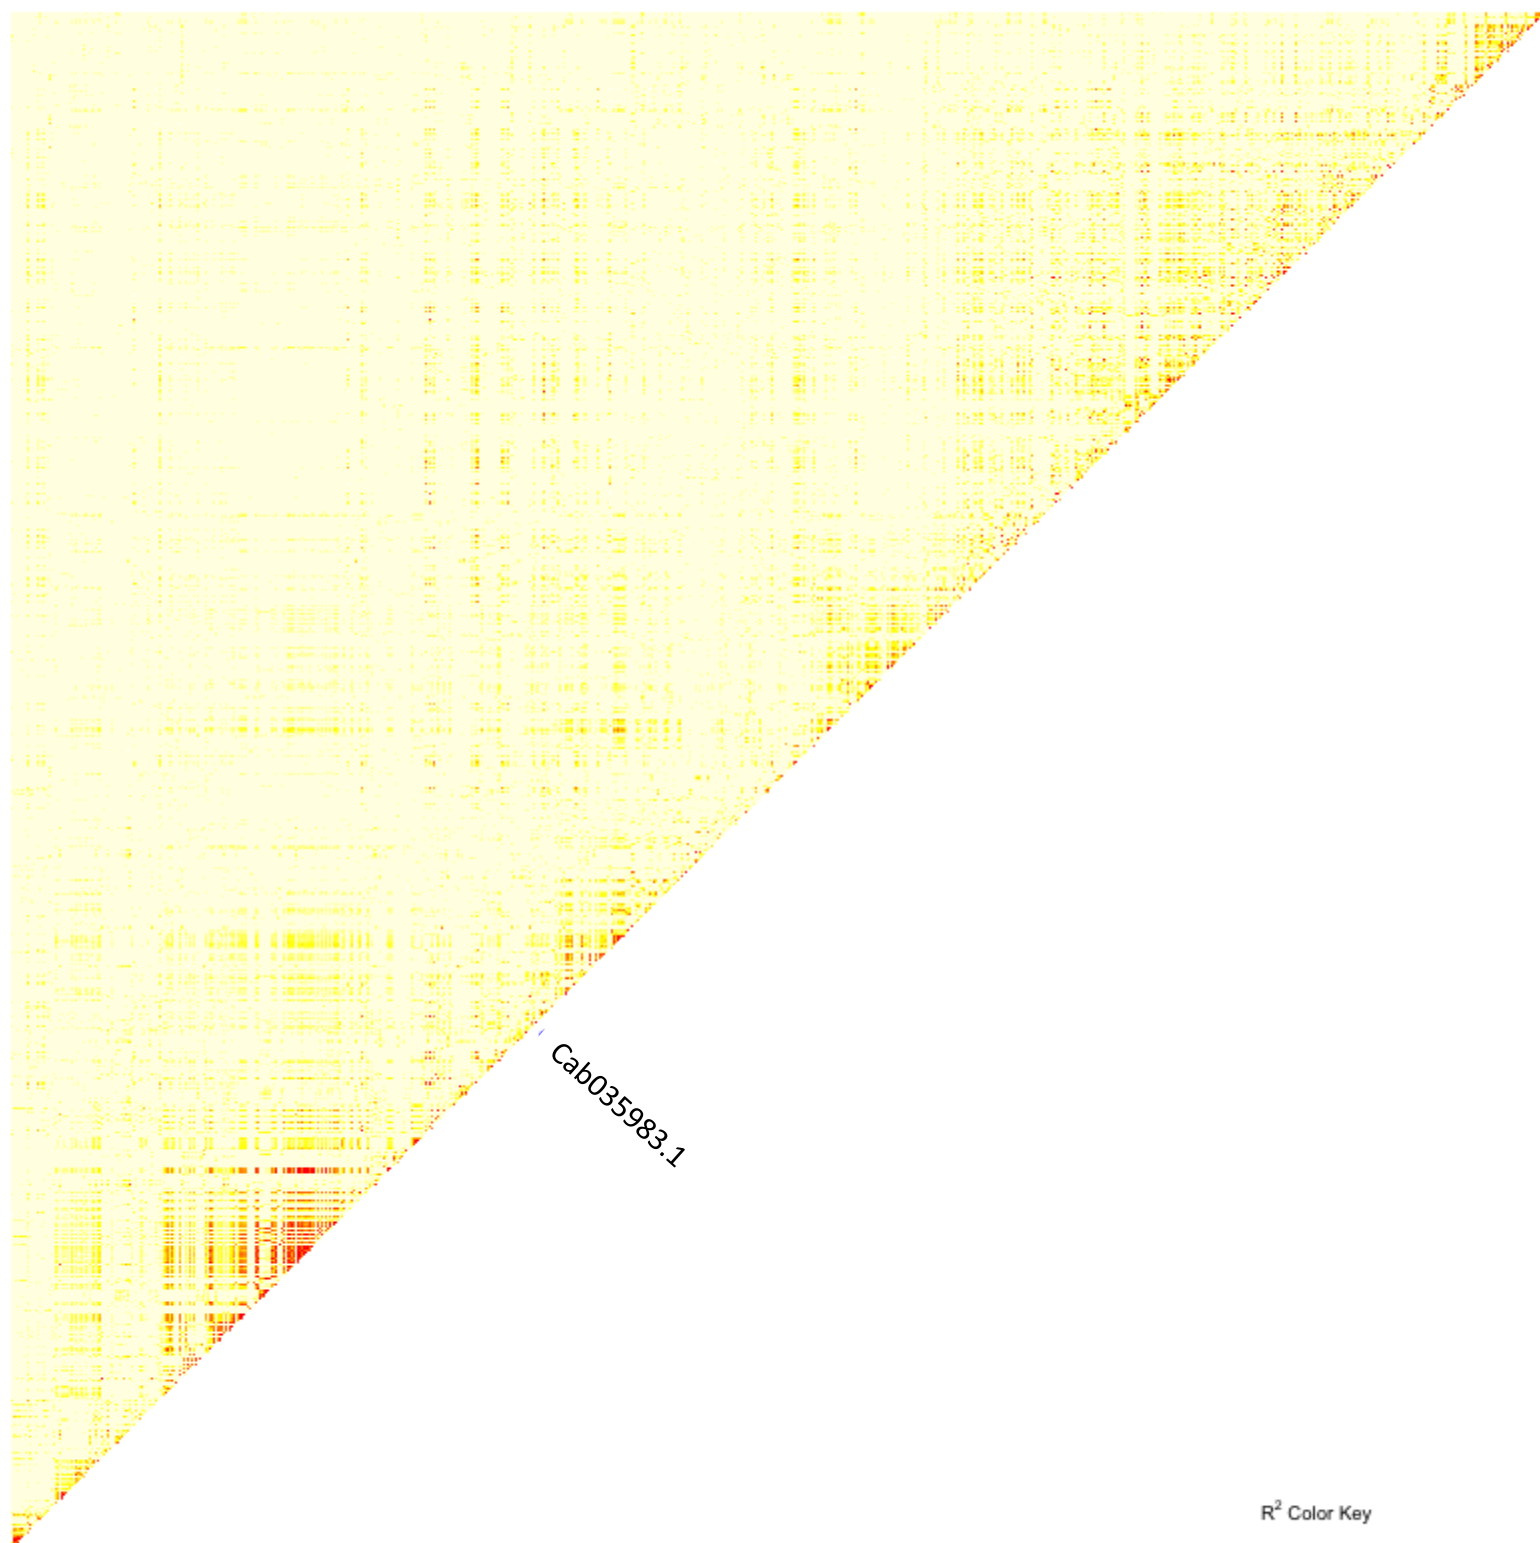

Cab035983.1

$R^2$  Color Key





Pairwise LD in  $r^2$  with 1763 SNPs in A09 cds range 2\_to\_7899 out of 7899

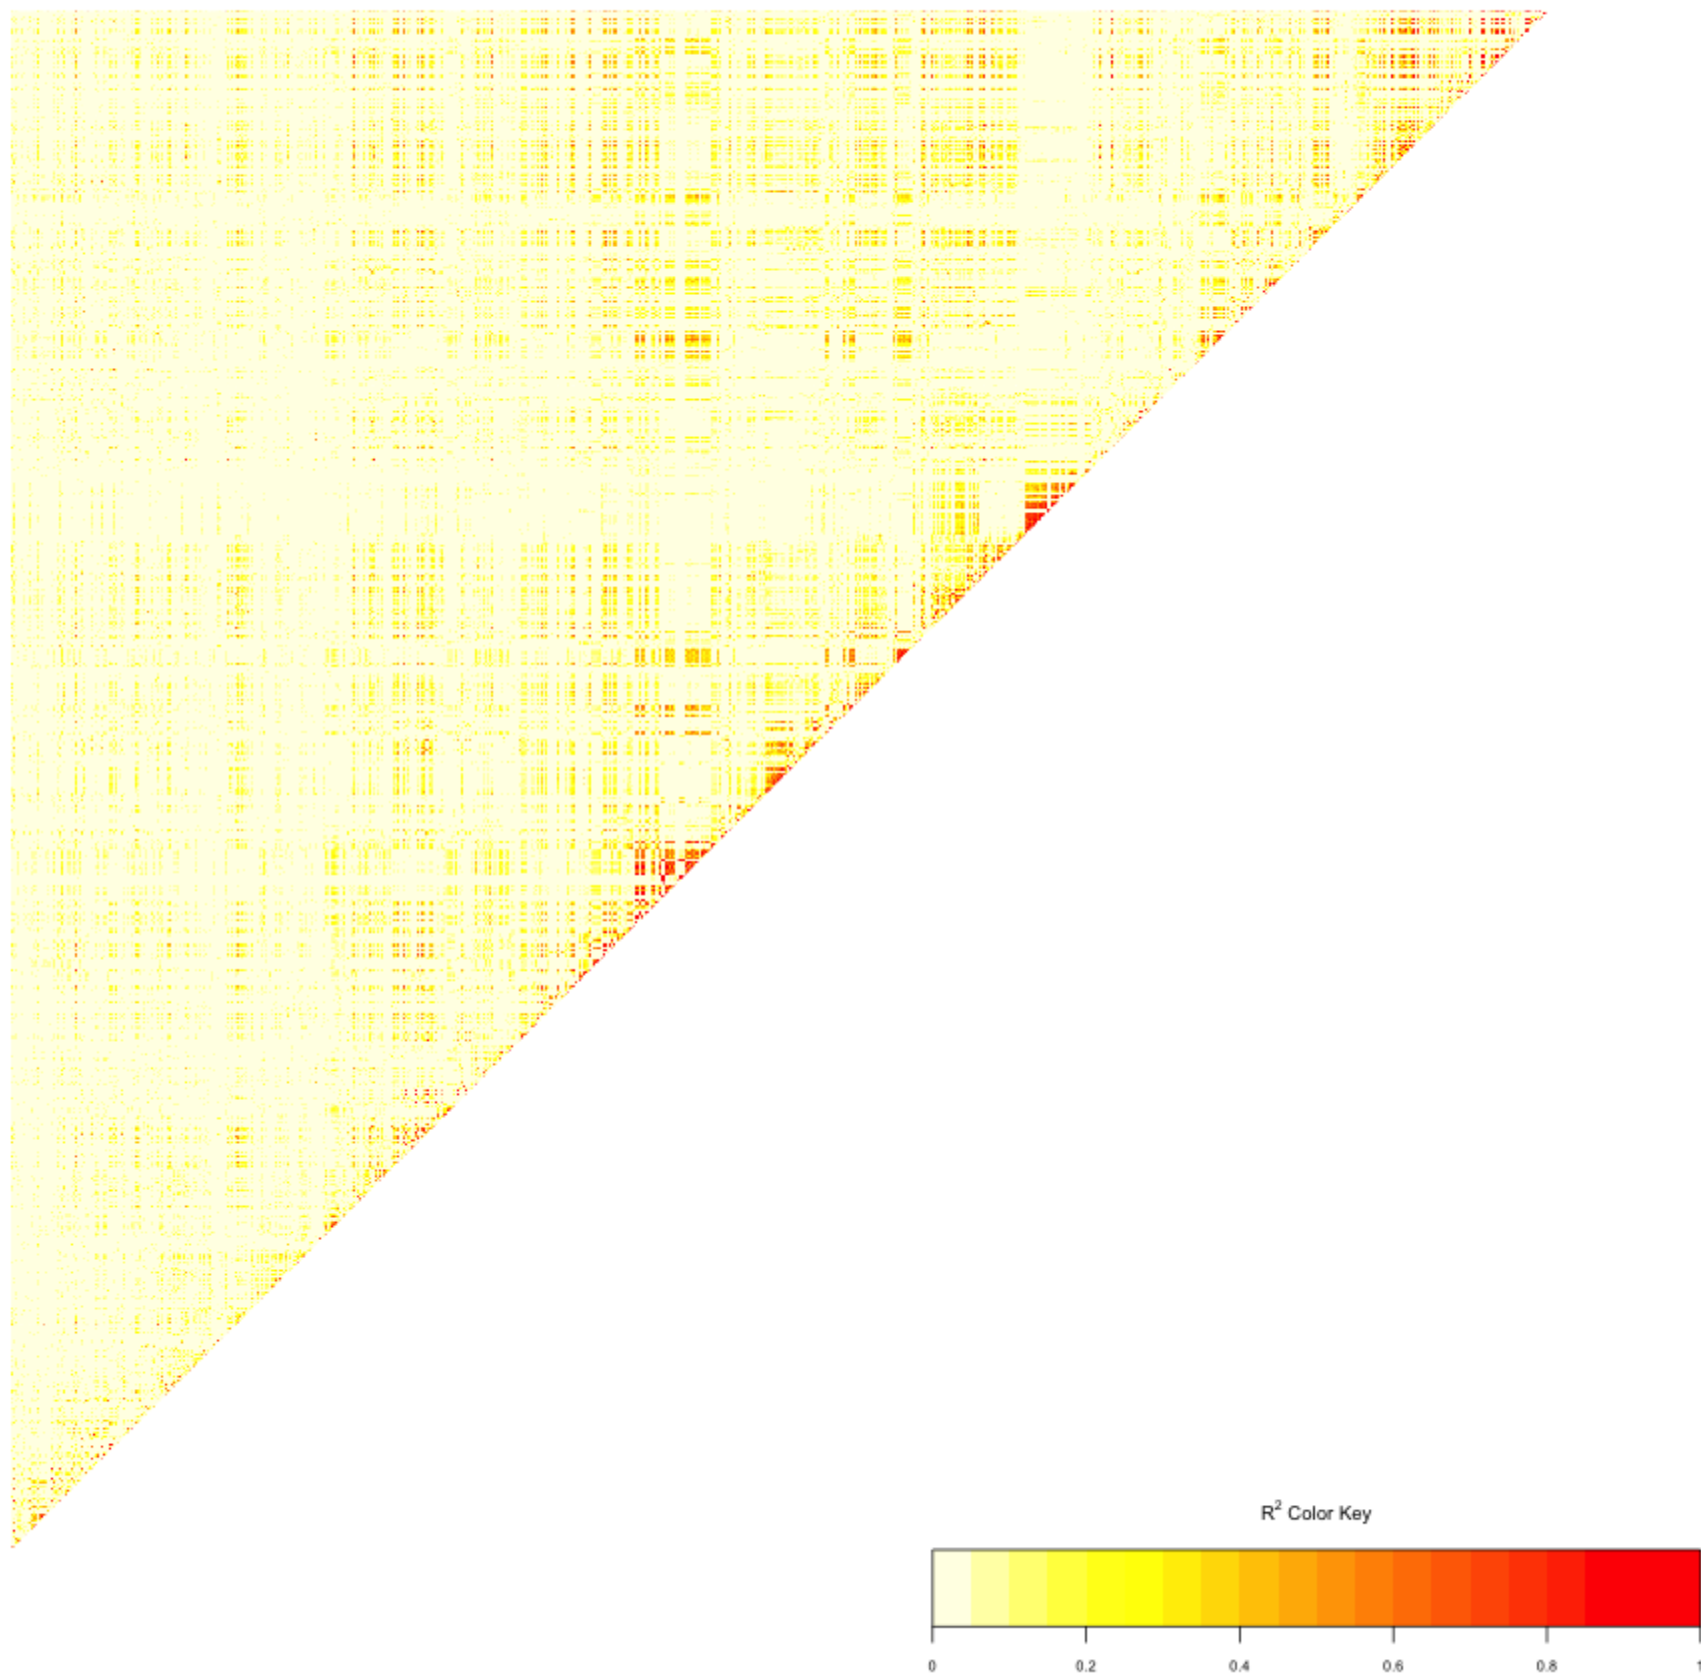

Pairwise LD in  $r^2$  with 920 SNPs in A10 cds range 3\_to\_3819 out of 3831

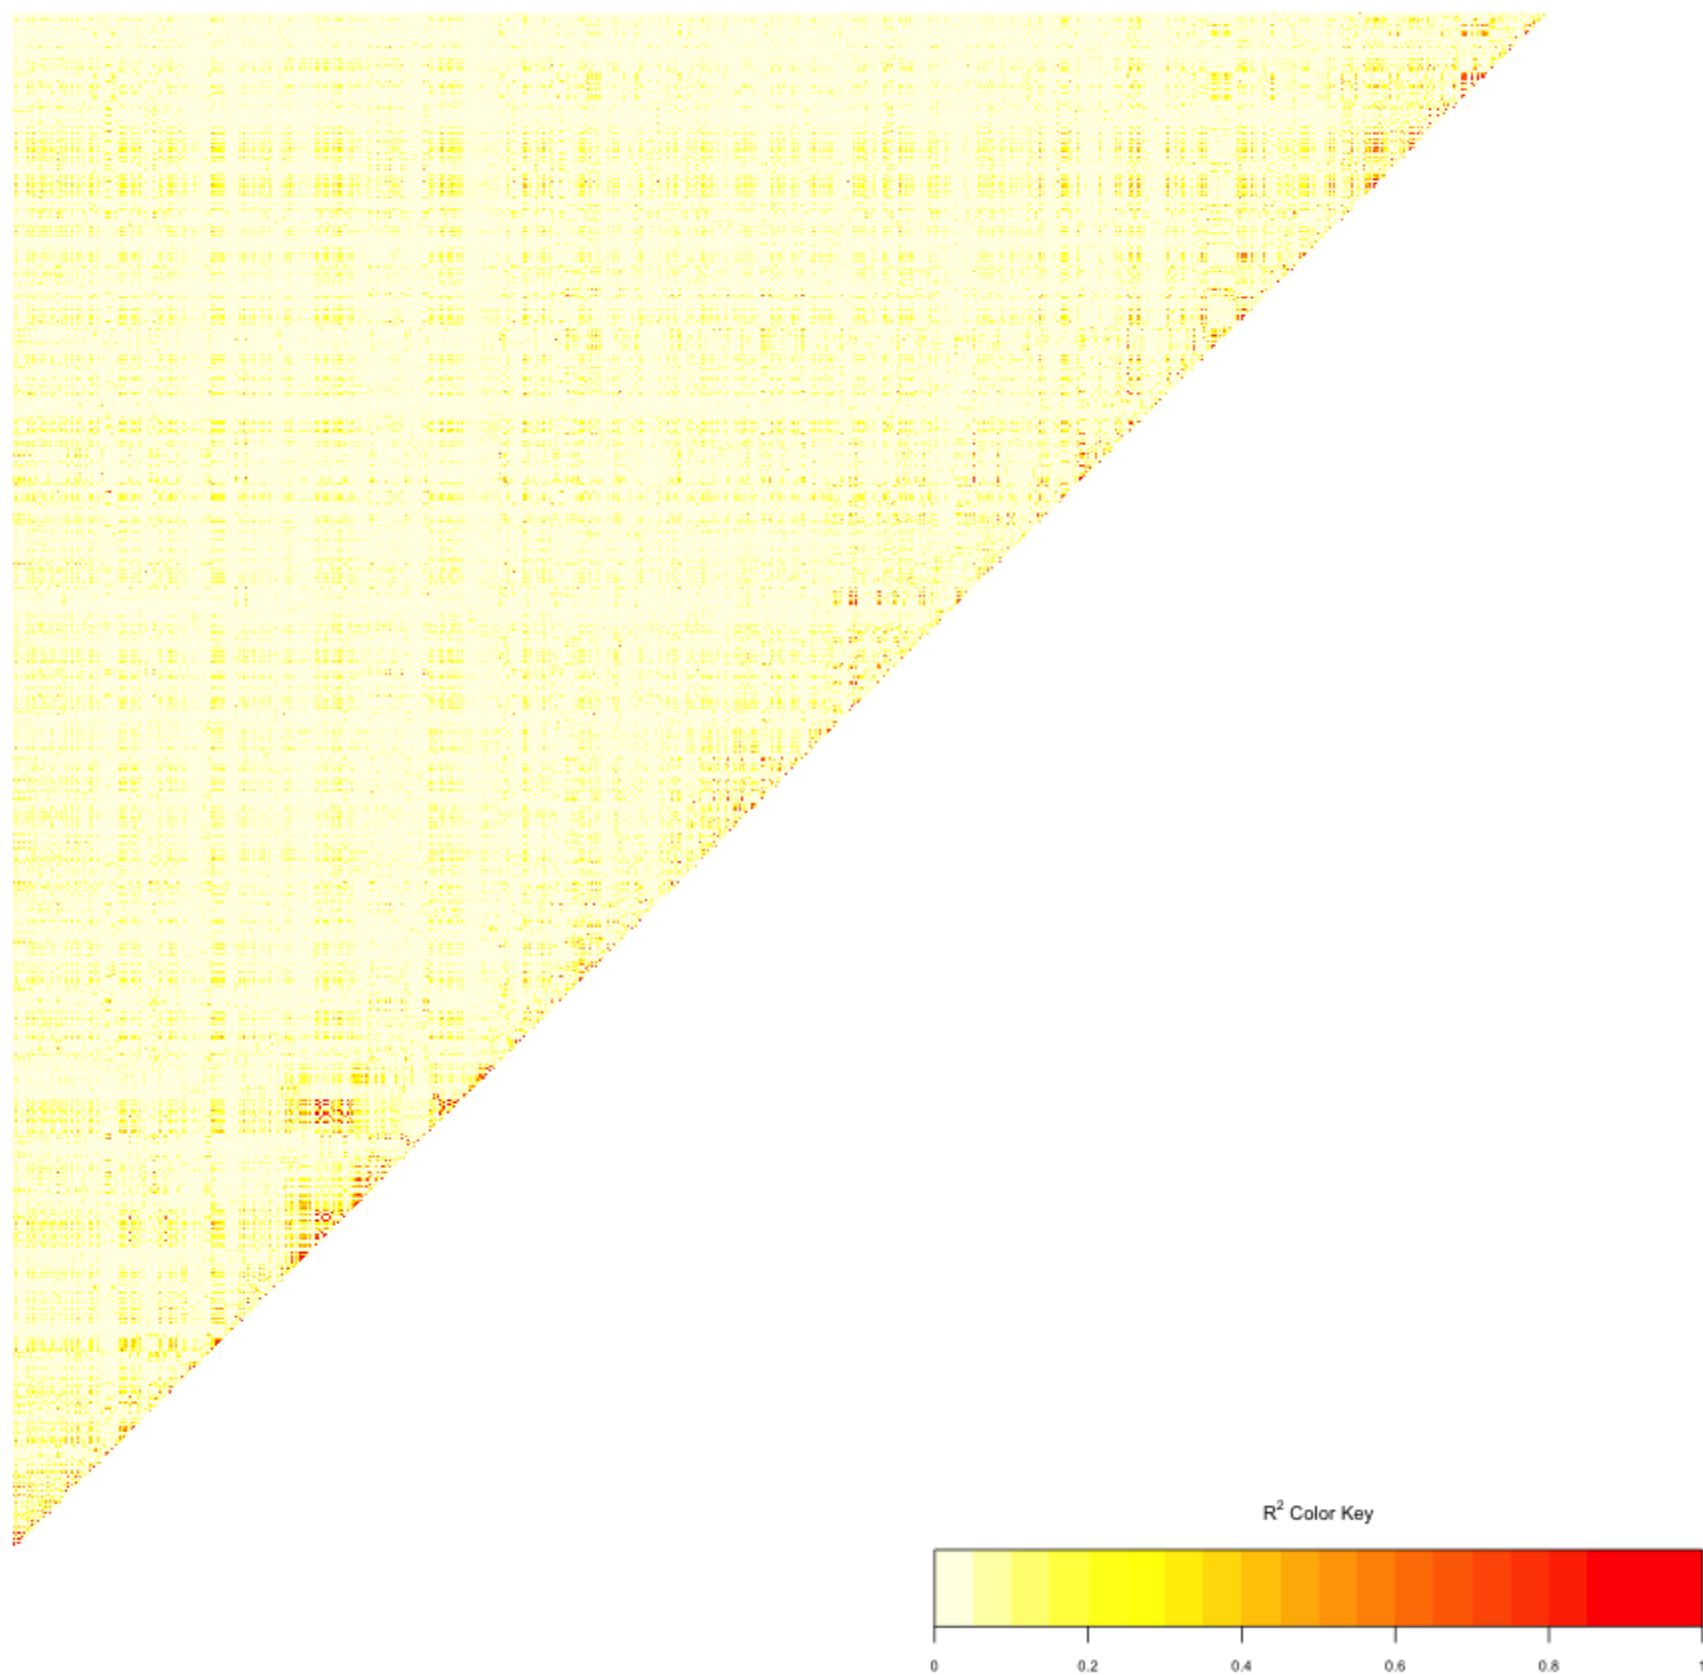

Pairwise LD in  $r^2$  with 1079 SNPs in C01 cds range 5\_to\_6207 out of 6211

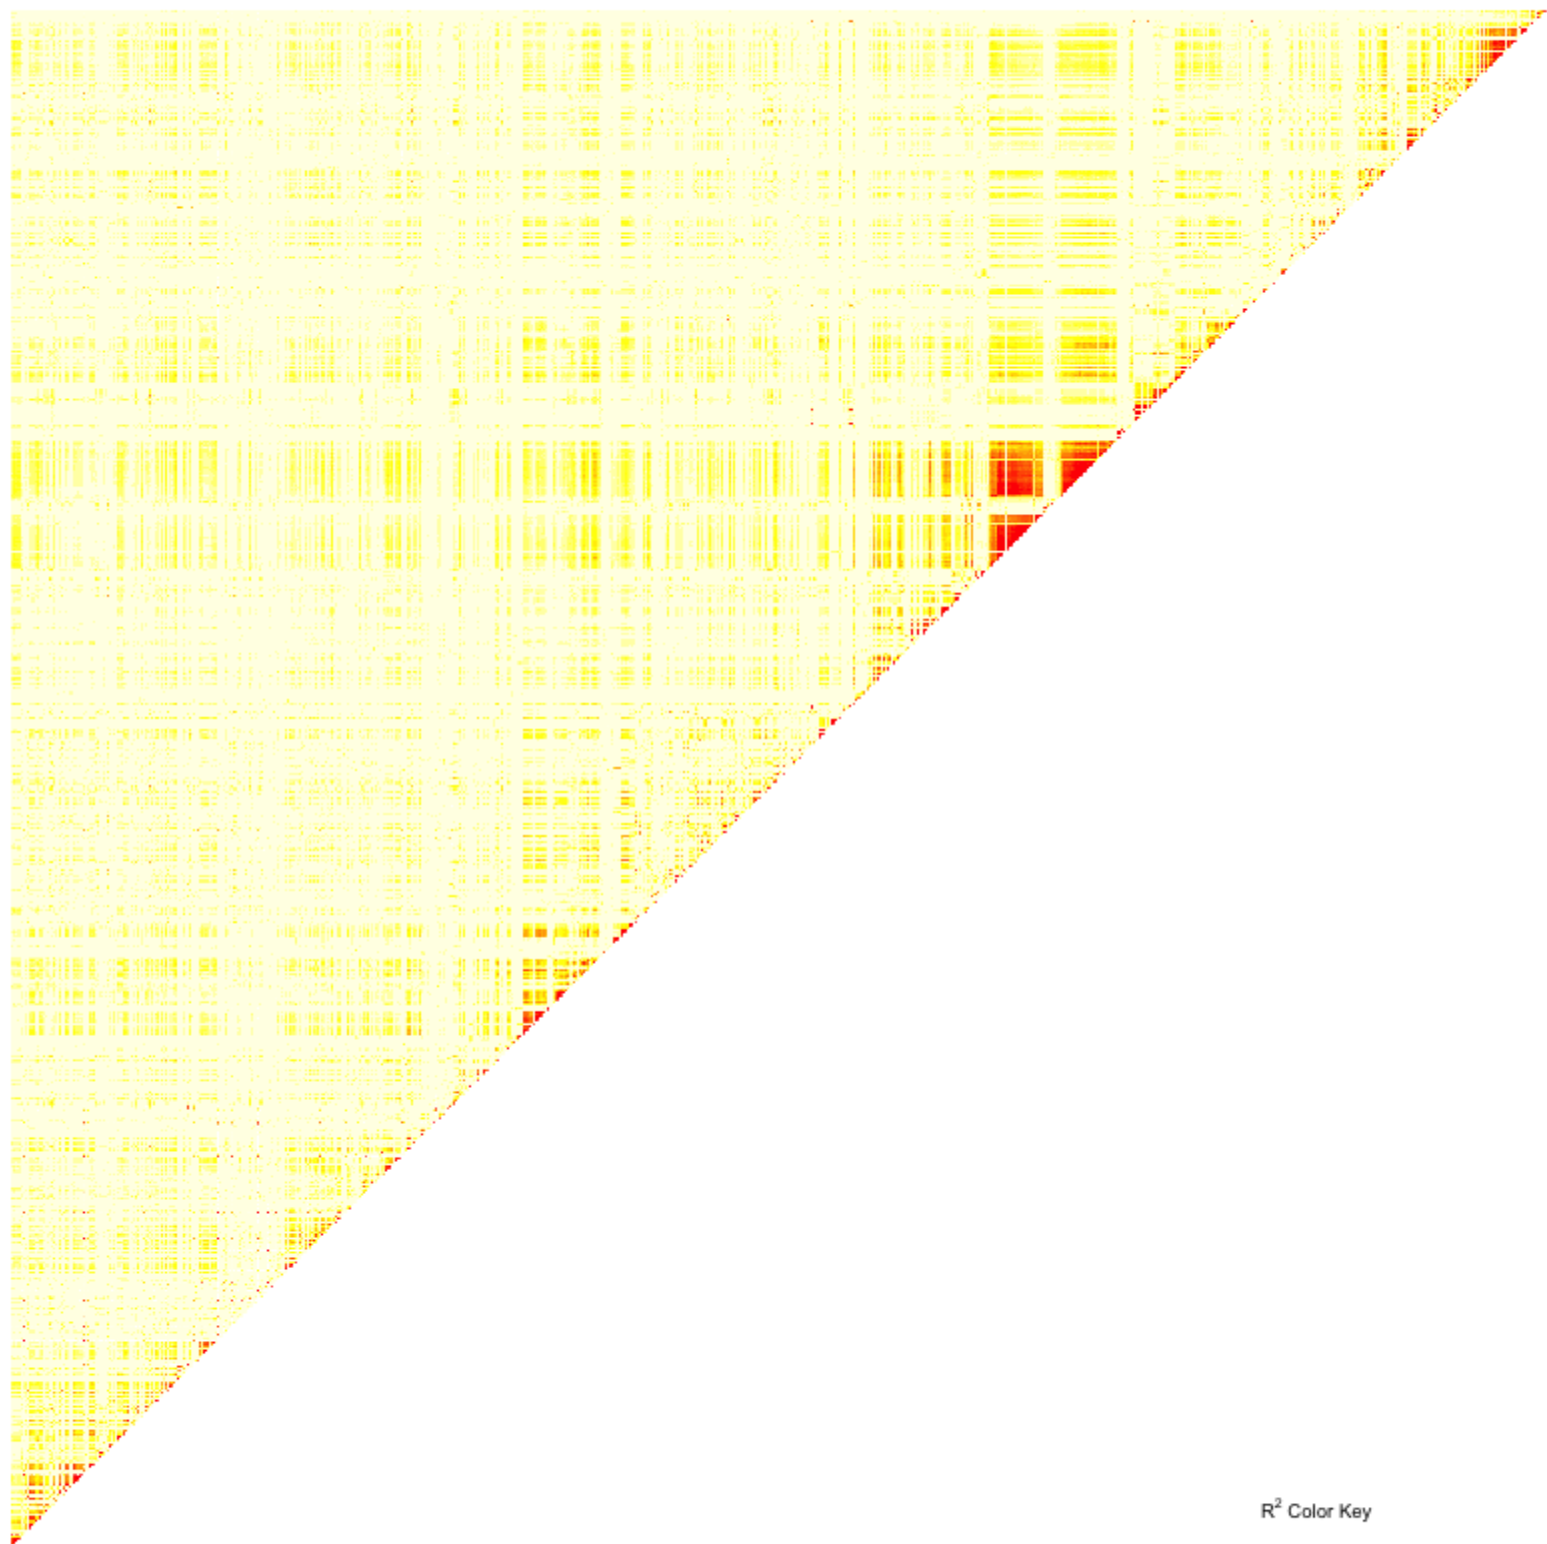

$R^2$  Color Key

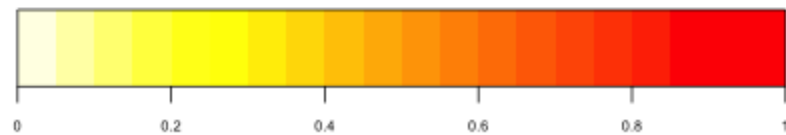

Pairwise LD in  $r^2$  with 936 SNPs in C02 cds range 15\_to\_6858 out of 6862

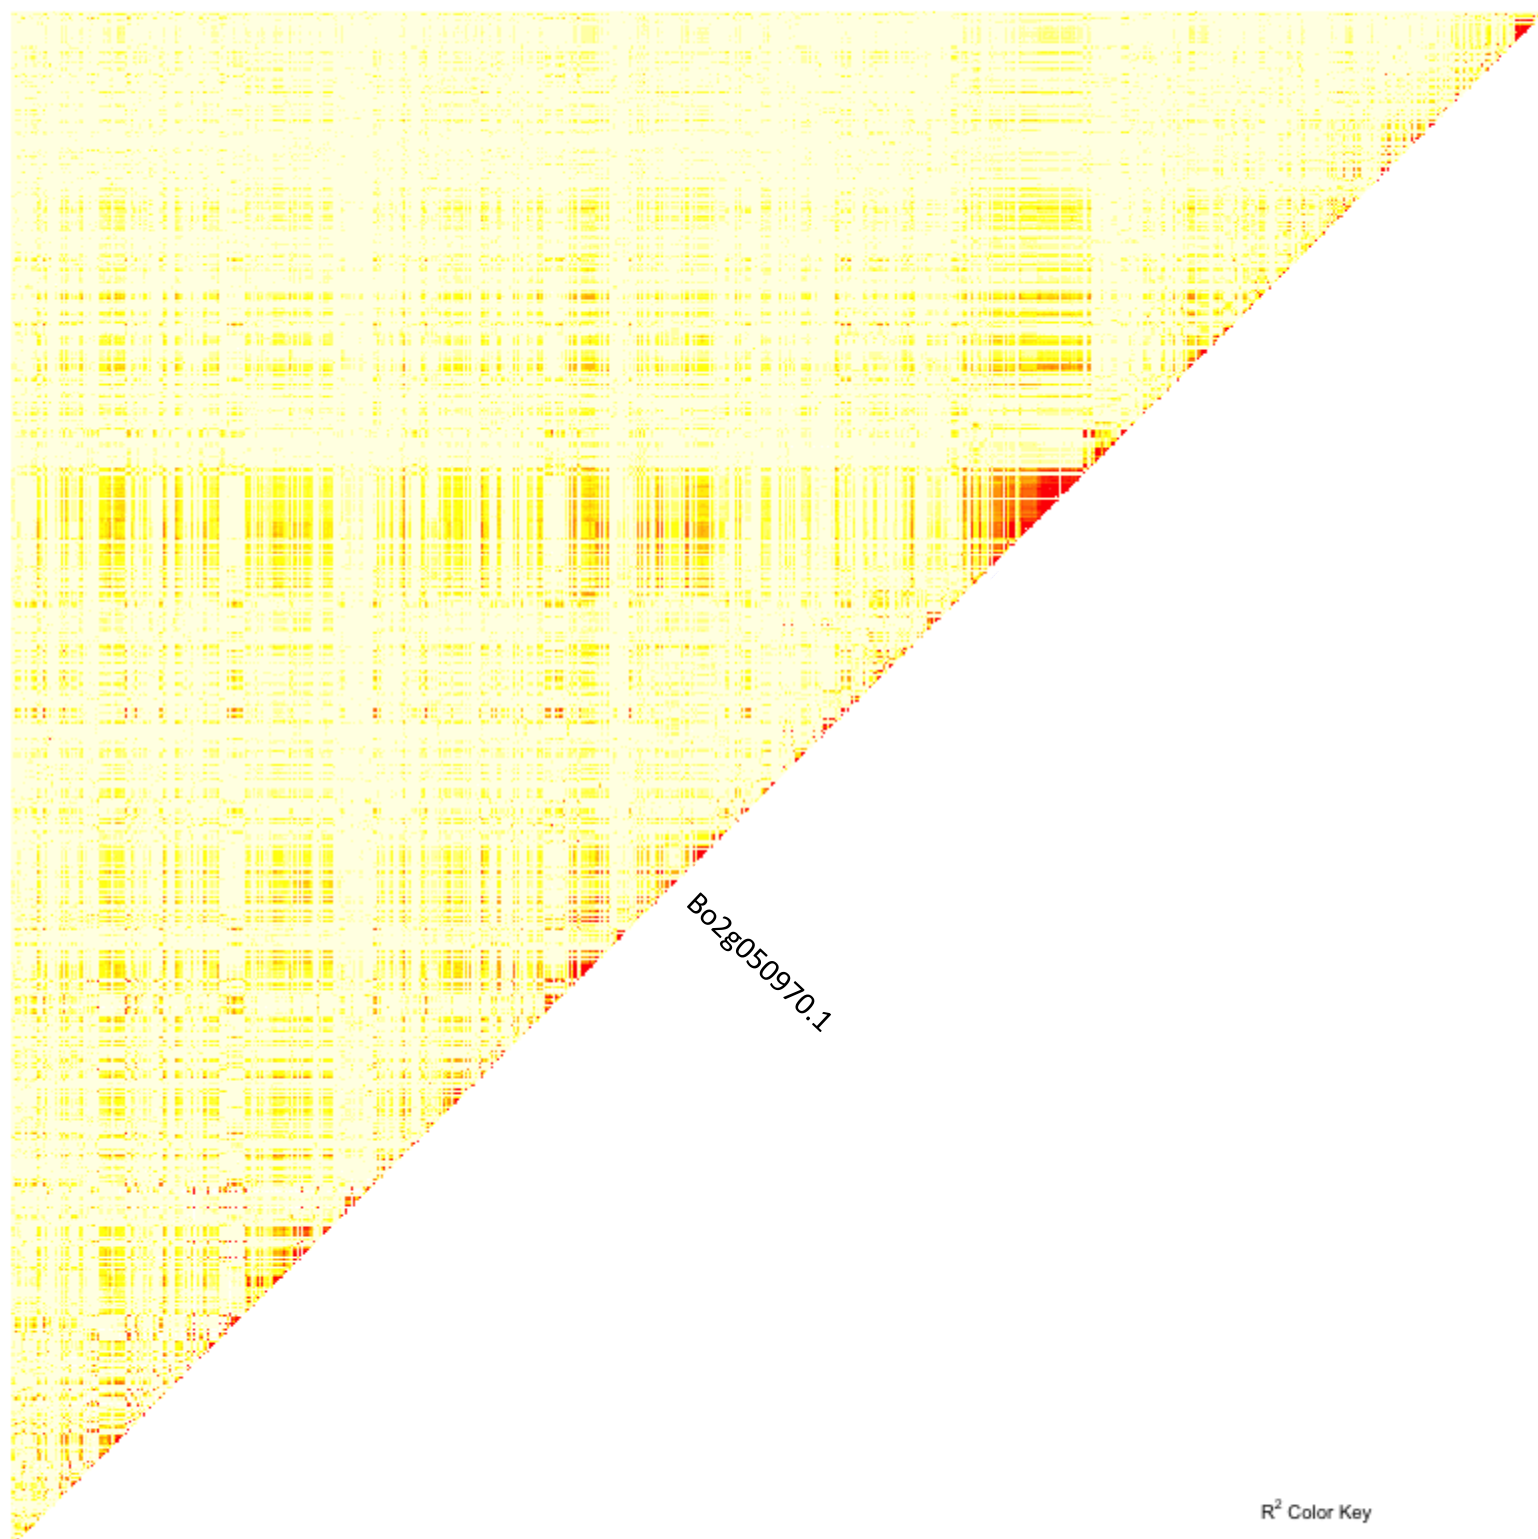

$R^2$  Color Key

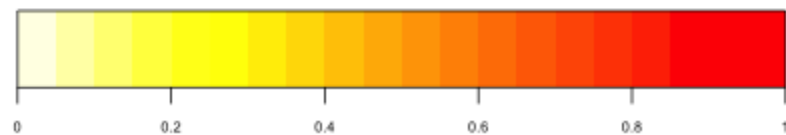

Pairwise LD in  $r^2$  with 1831 SNPs in C03 cds range 20\_to\_9719 out of 9721

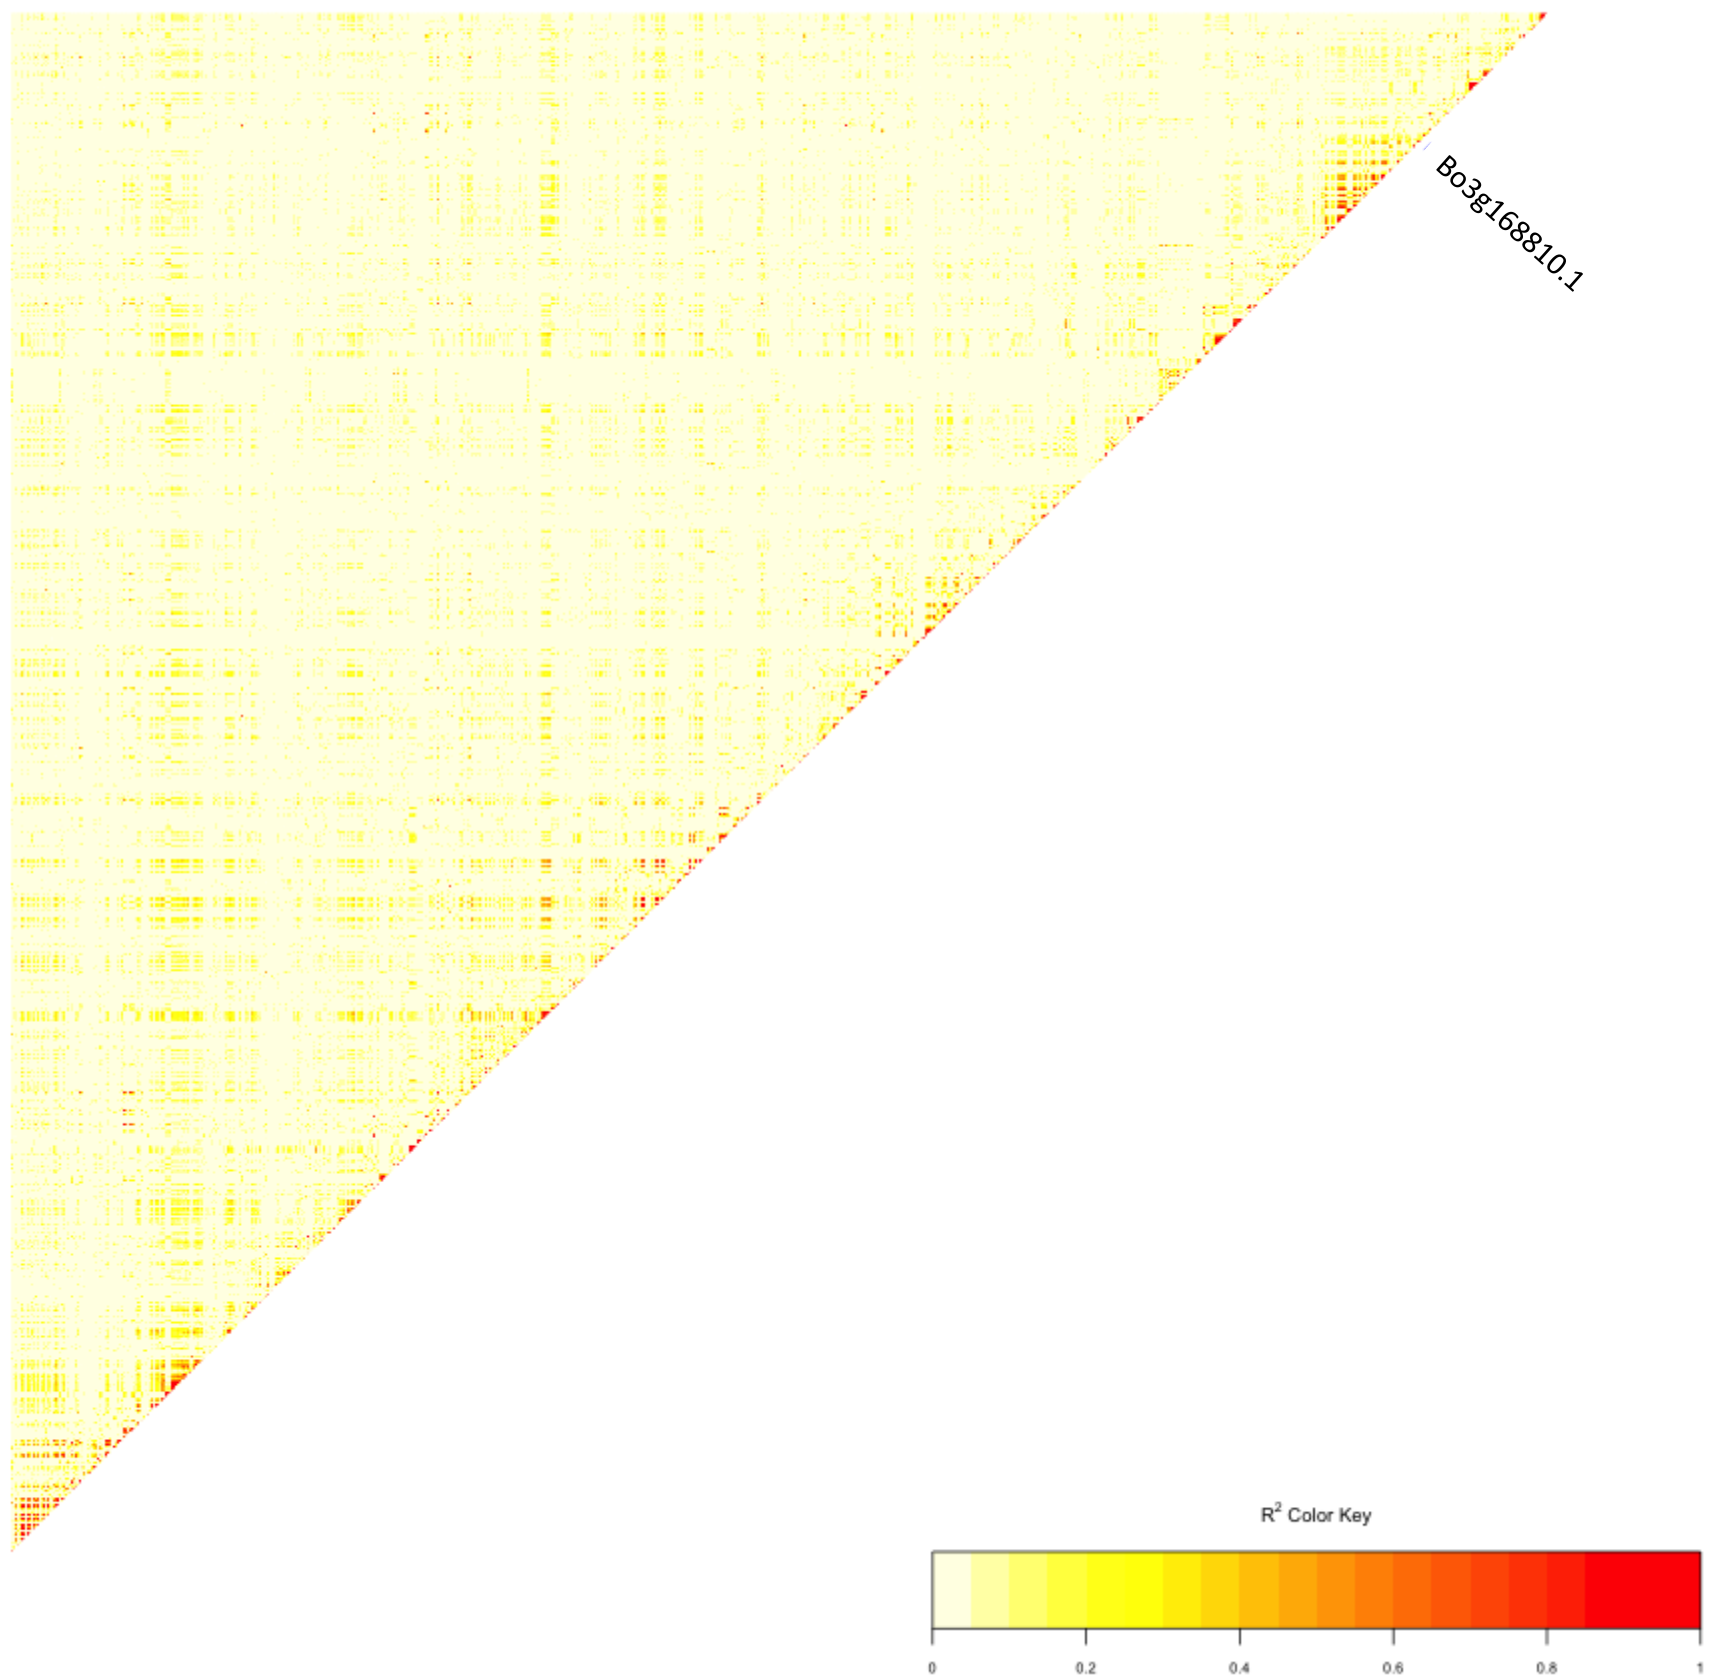

Pairwise LD in  $r^2$  with 1218 SNPs in C04 cds range 4\_to\_7479 out of 7484

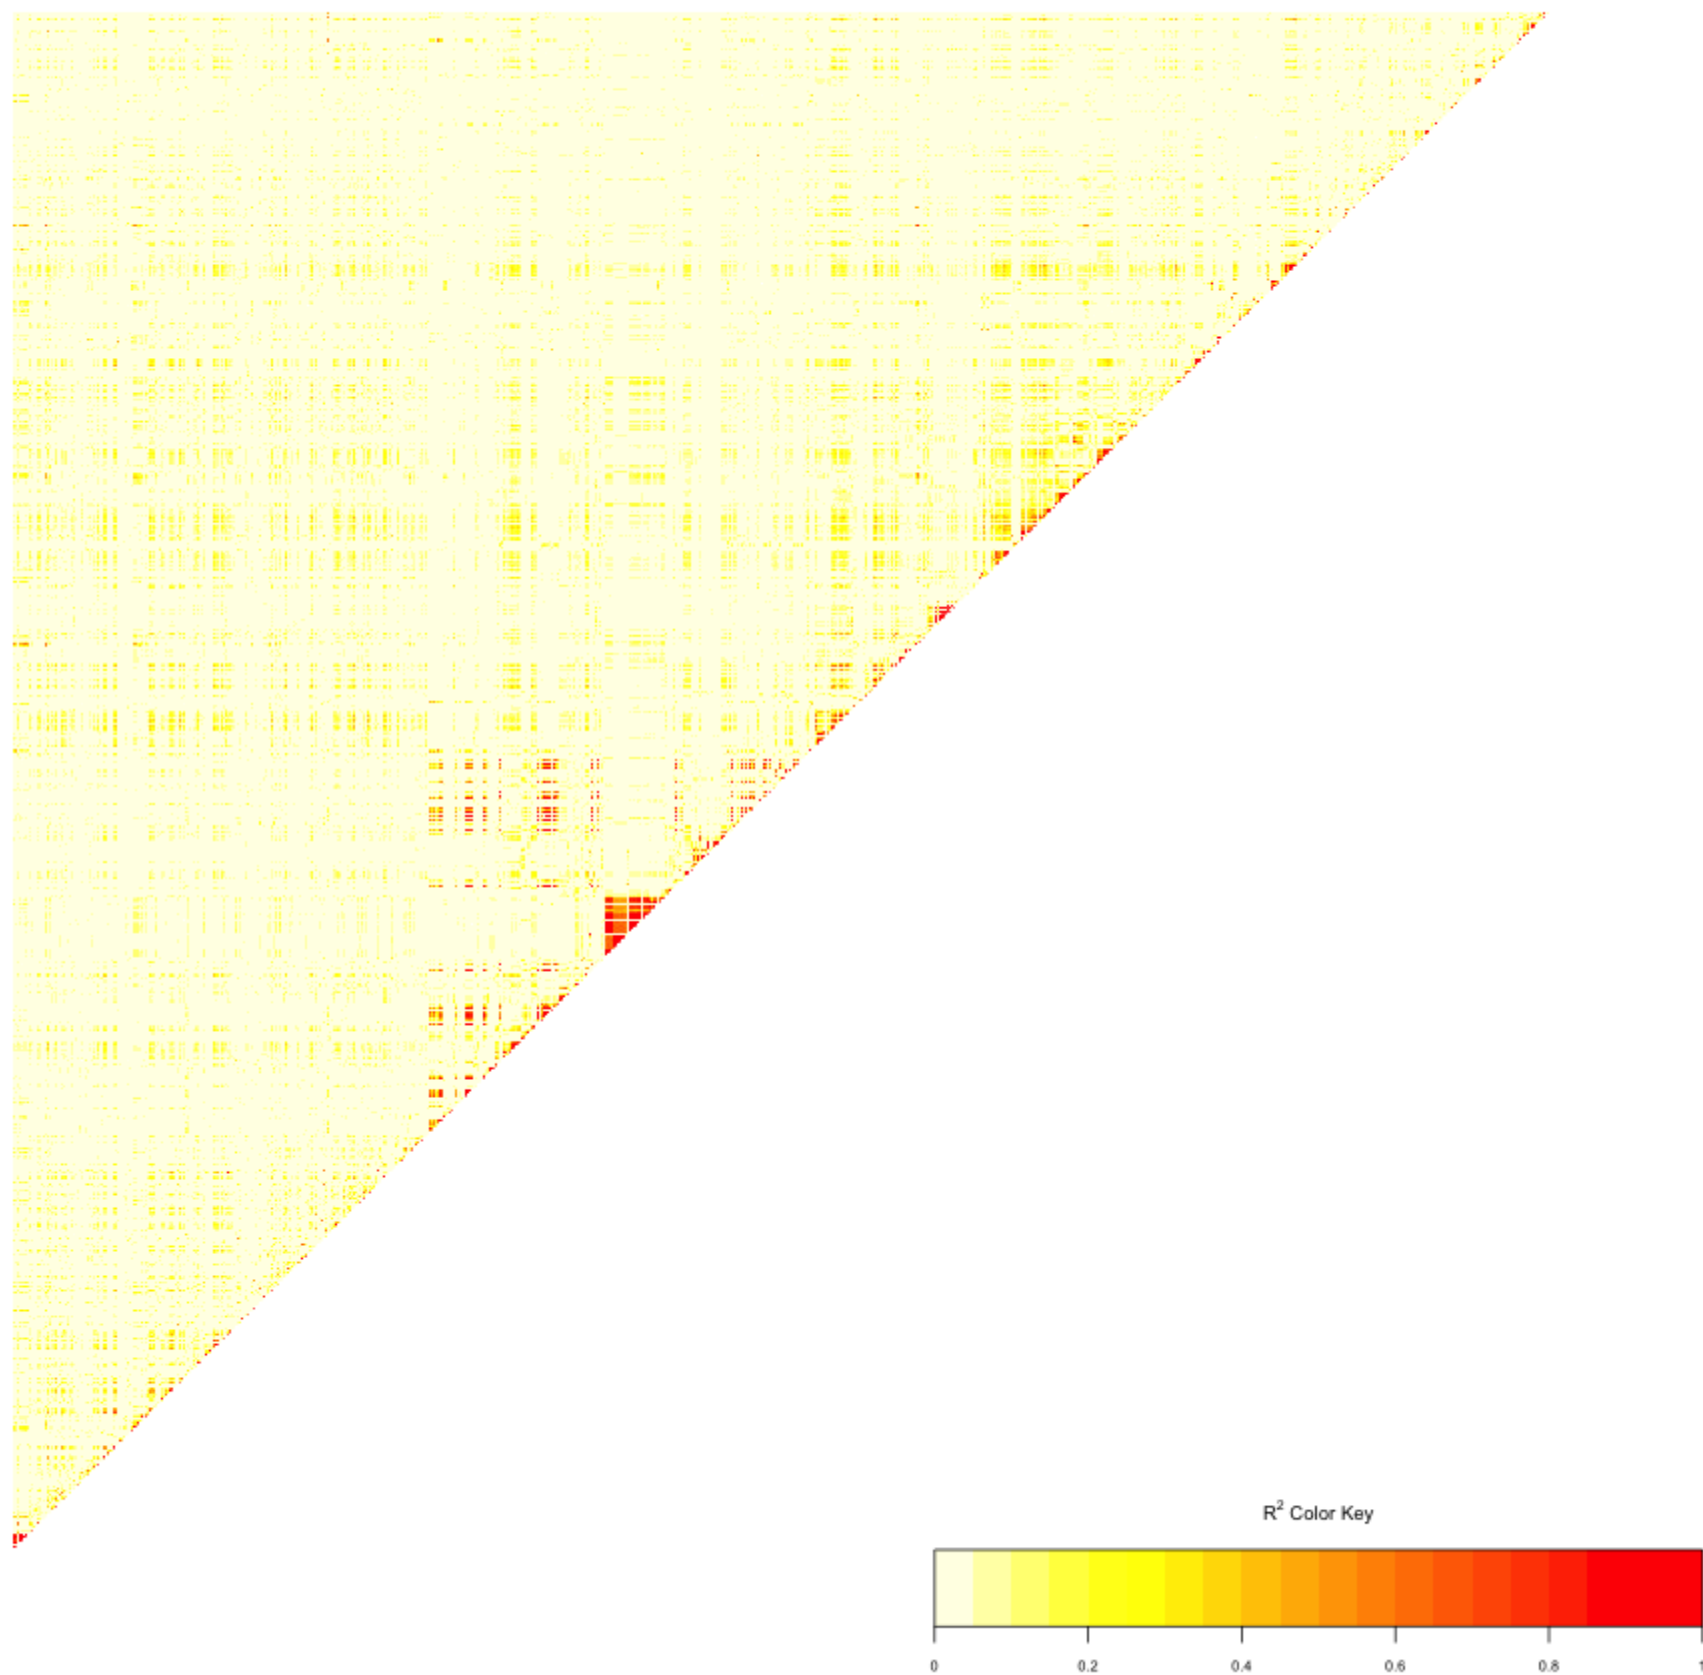



Pairwise LD in  $r^2$  with 1085 SNPs in C05 cds range 2\_to\_6795 out of 6797

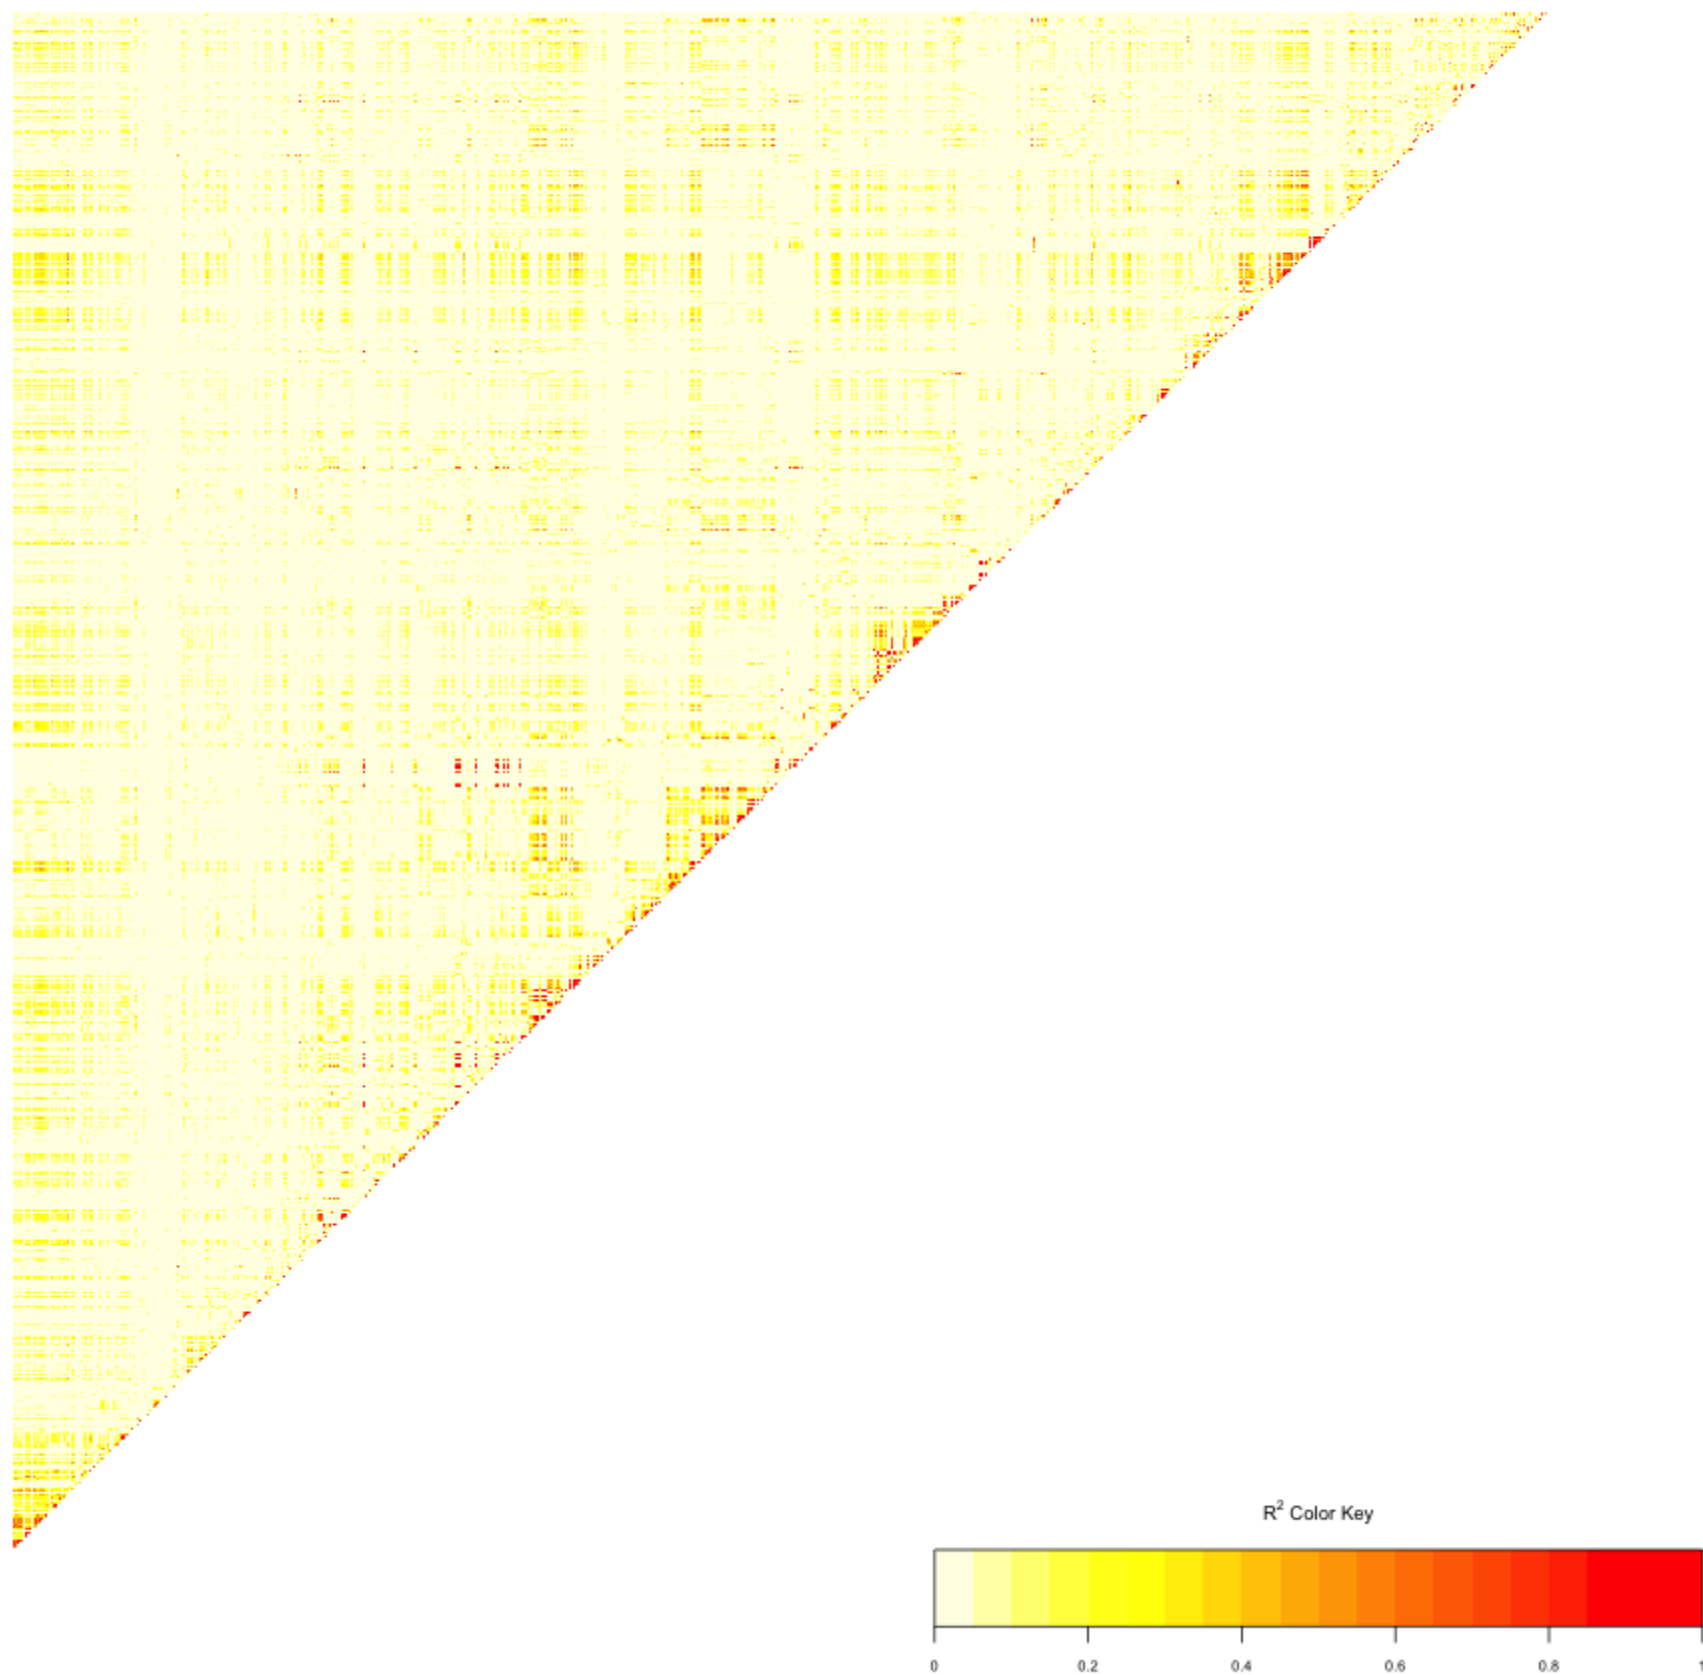

Pairwise LD in  $r^2$  with 940 SNPs in C06 cds range 21\_to\_5552 out of 5557

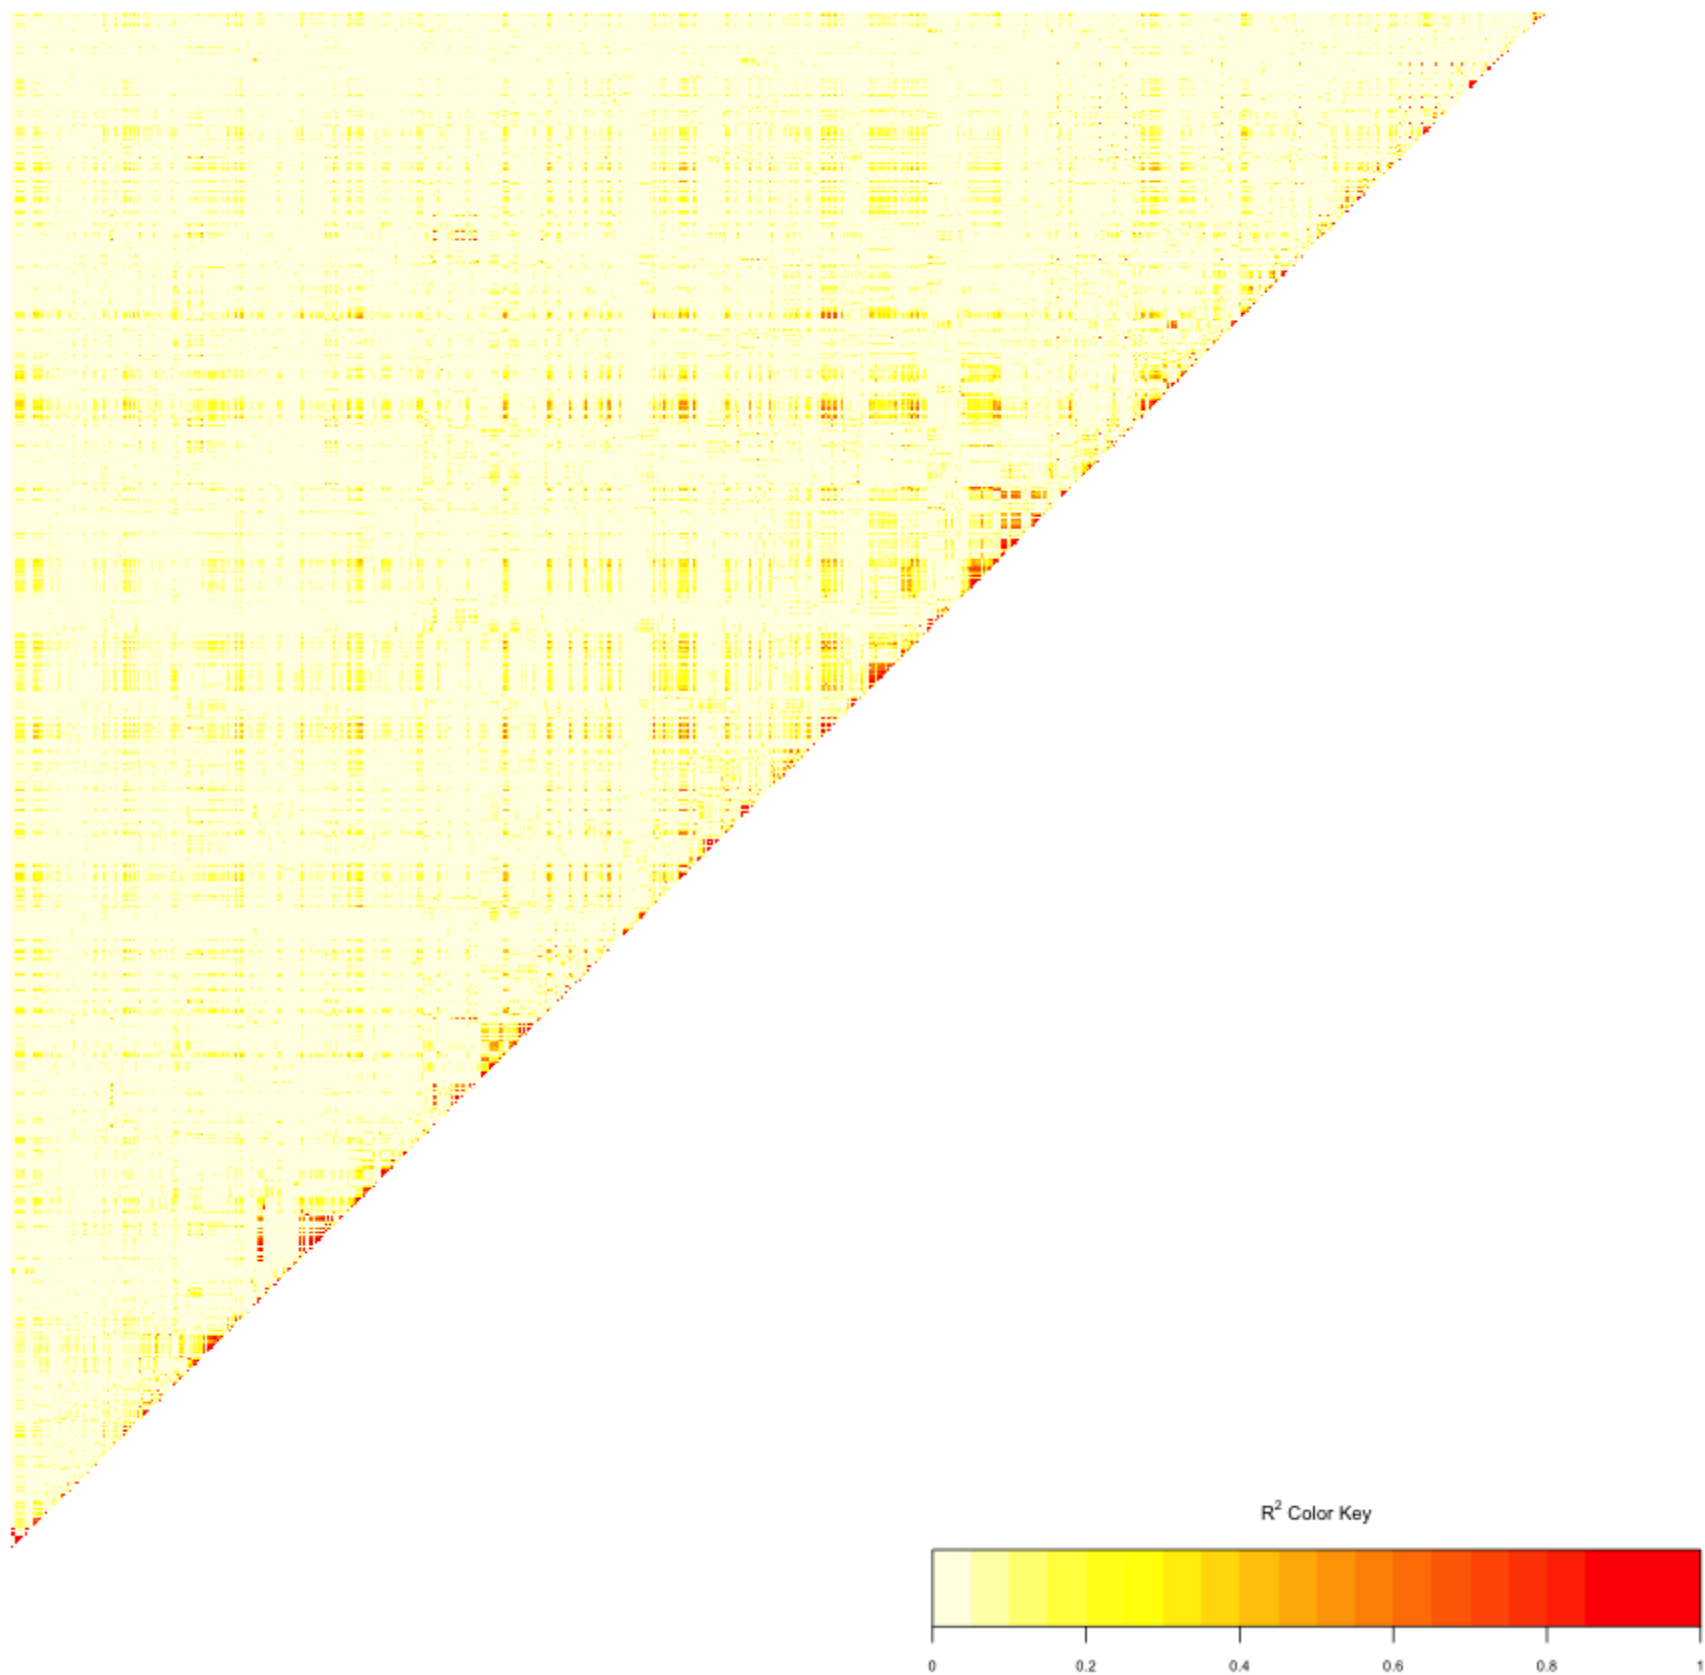

Pairwise LD in  $r^2$  with 1019 SNPs in C07 cds range 52\_to\_6623 out of 6623

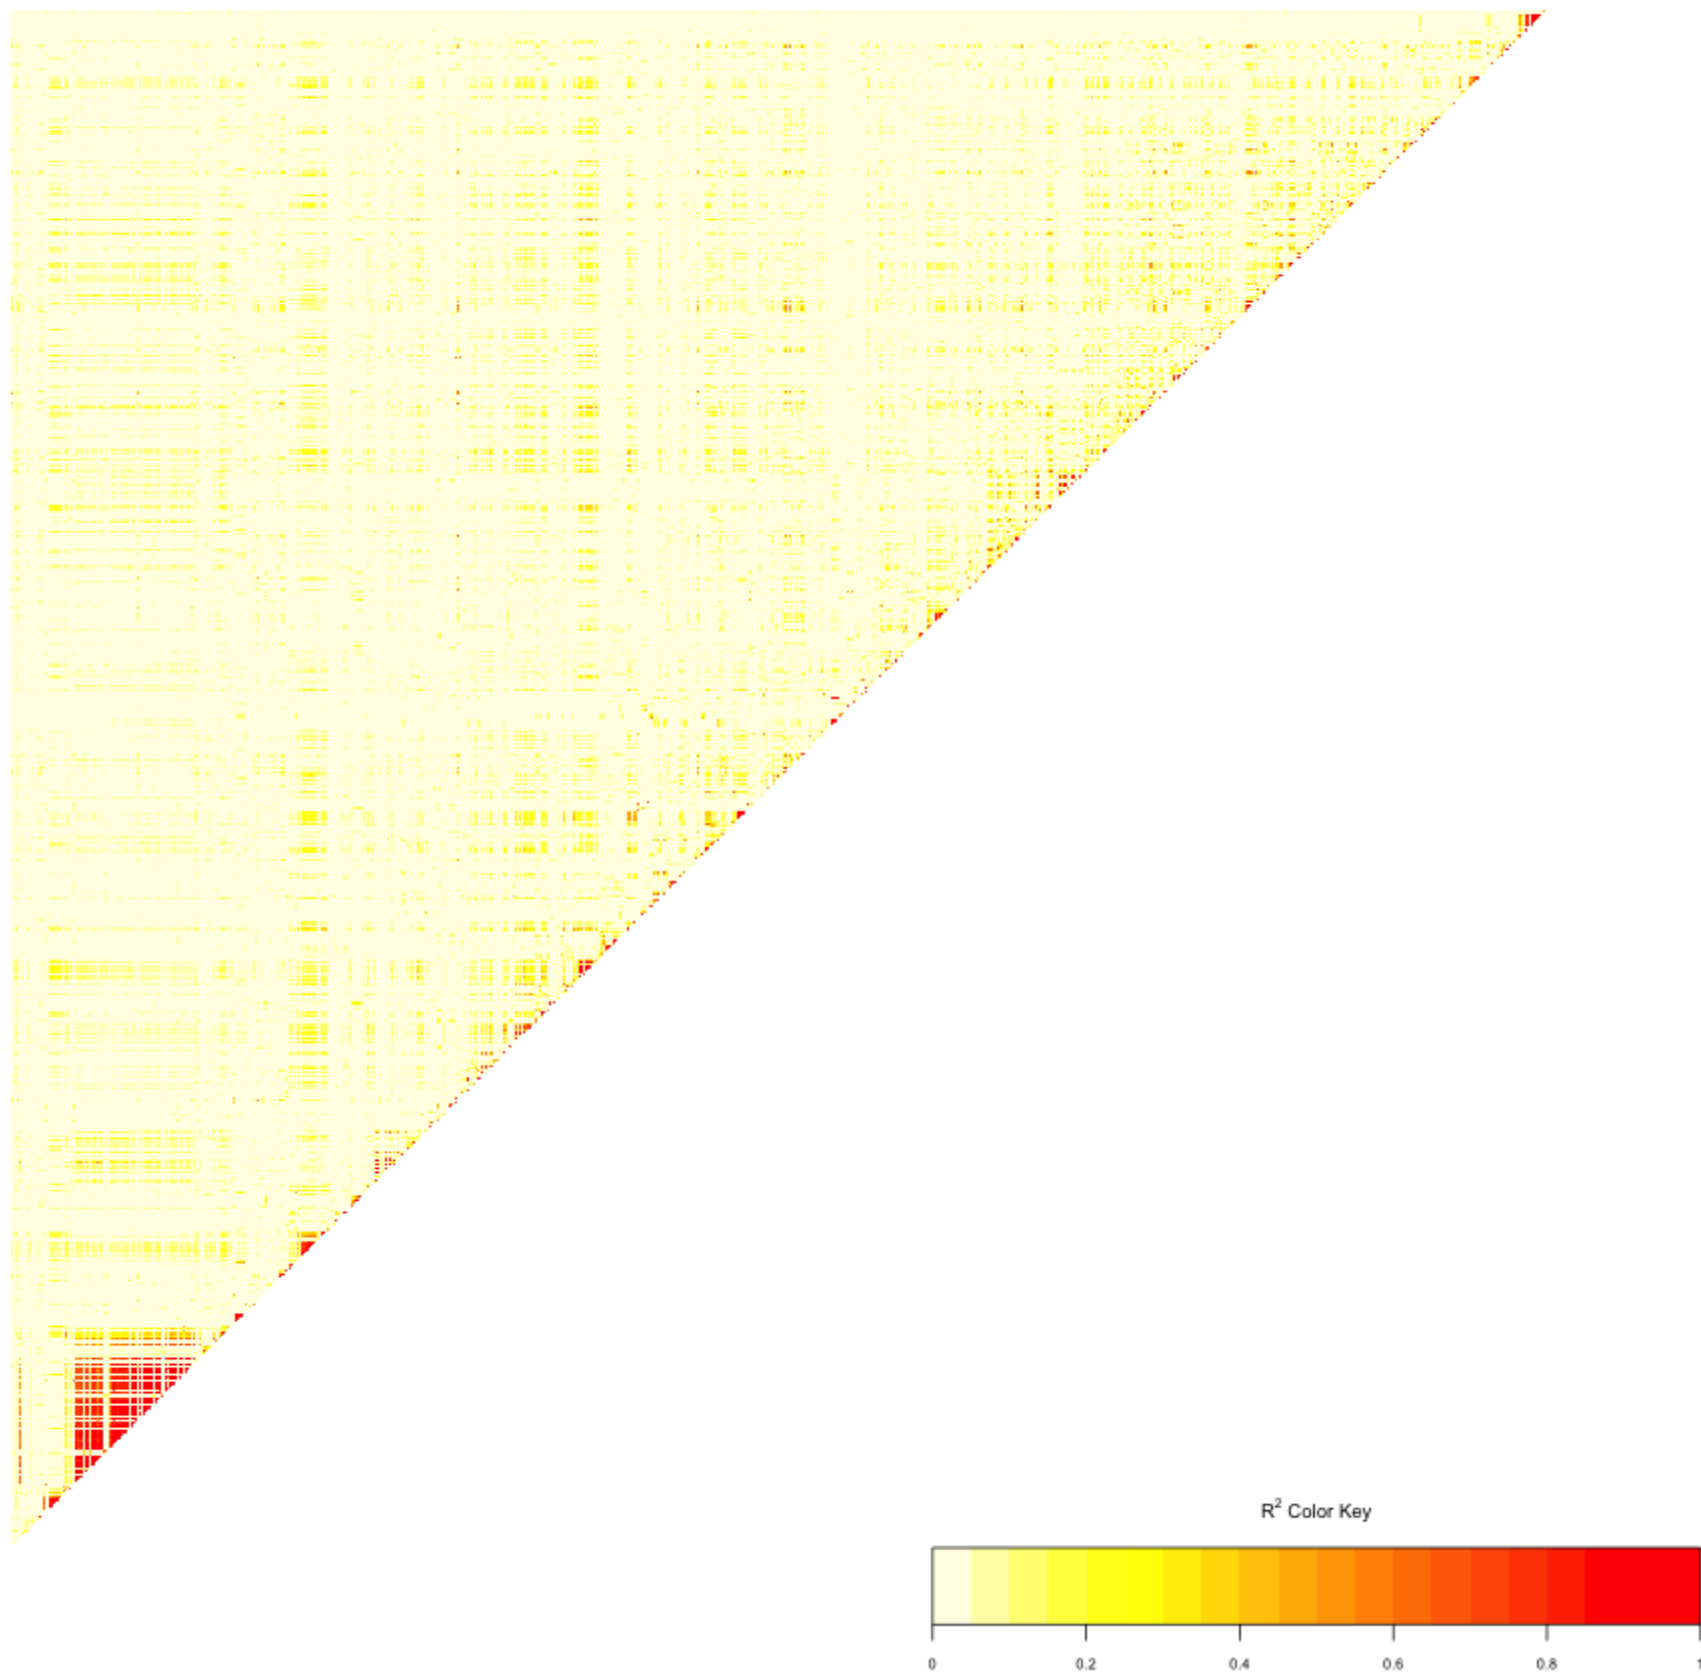

Pairwise LD in  $r^2$  with 1013 SNPs in C08 cds range 29\_to\_6414 out of 6418

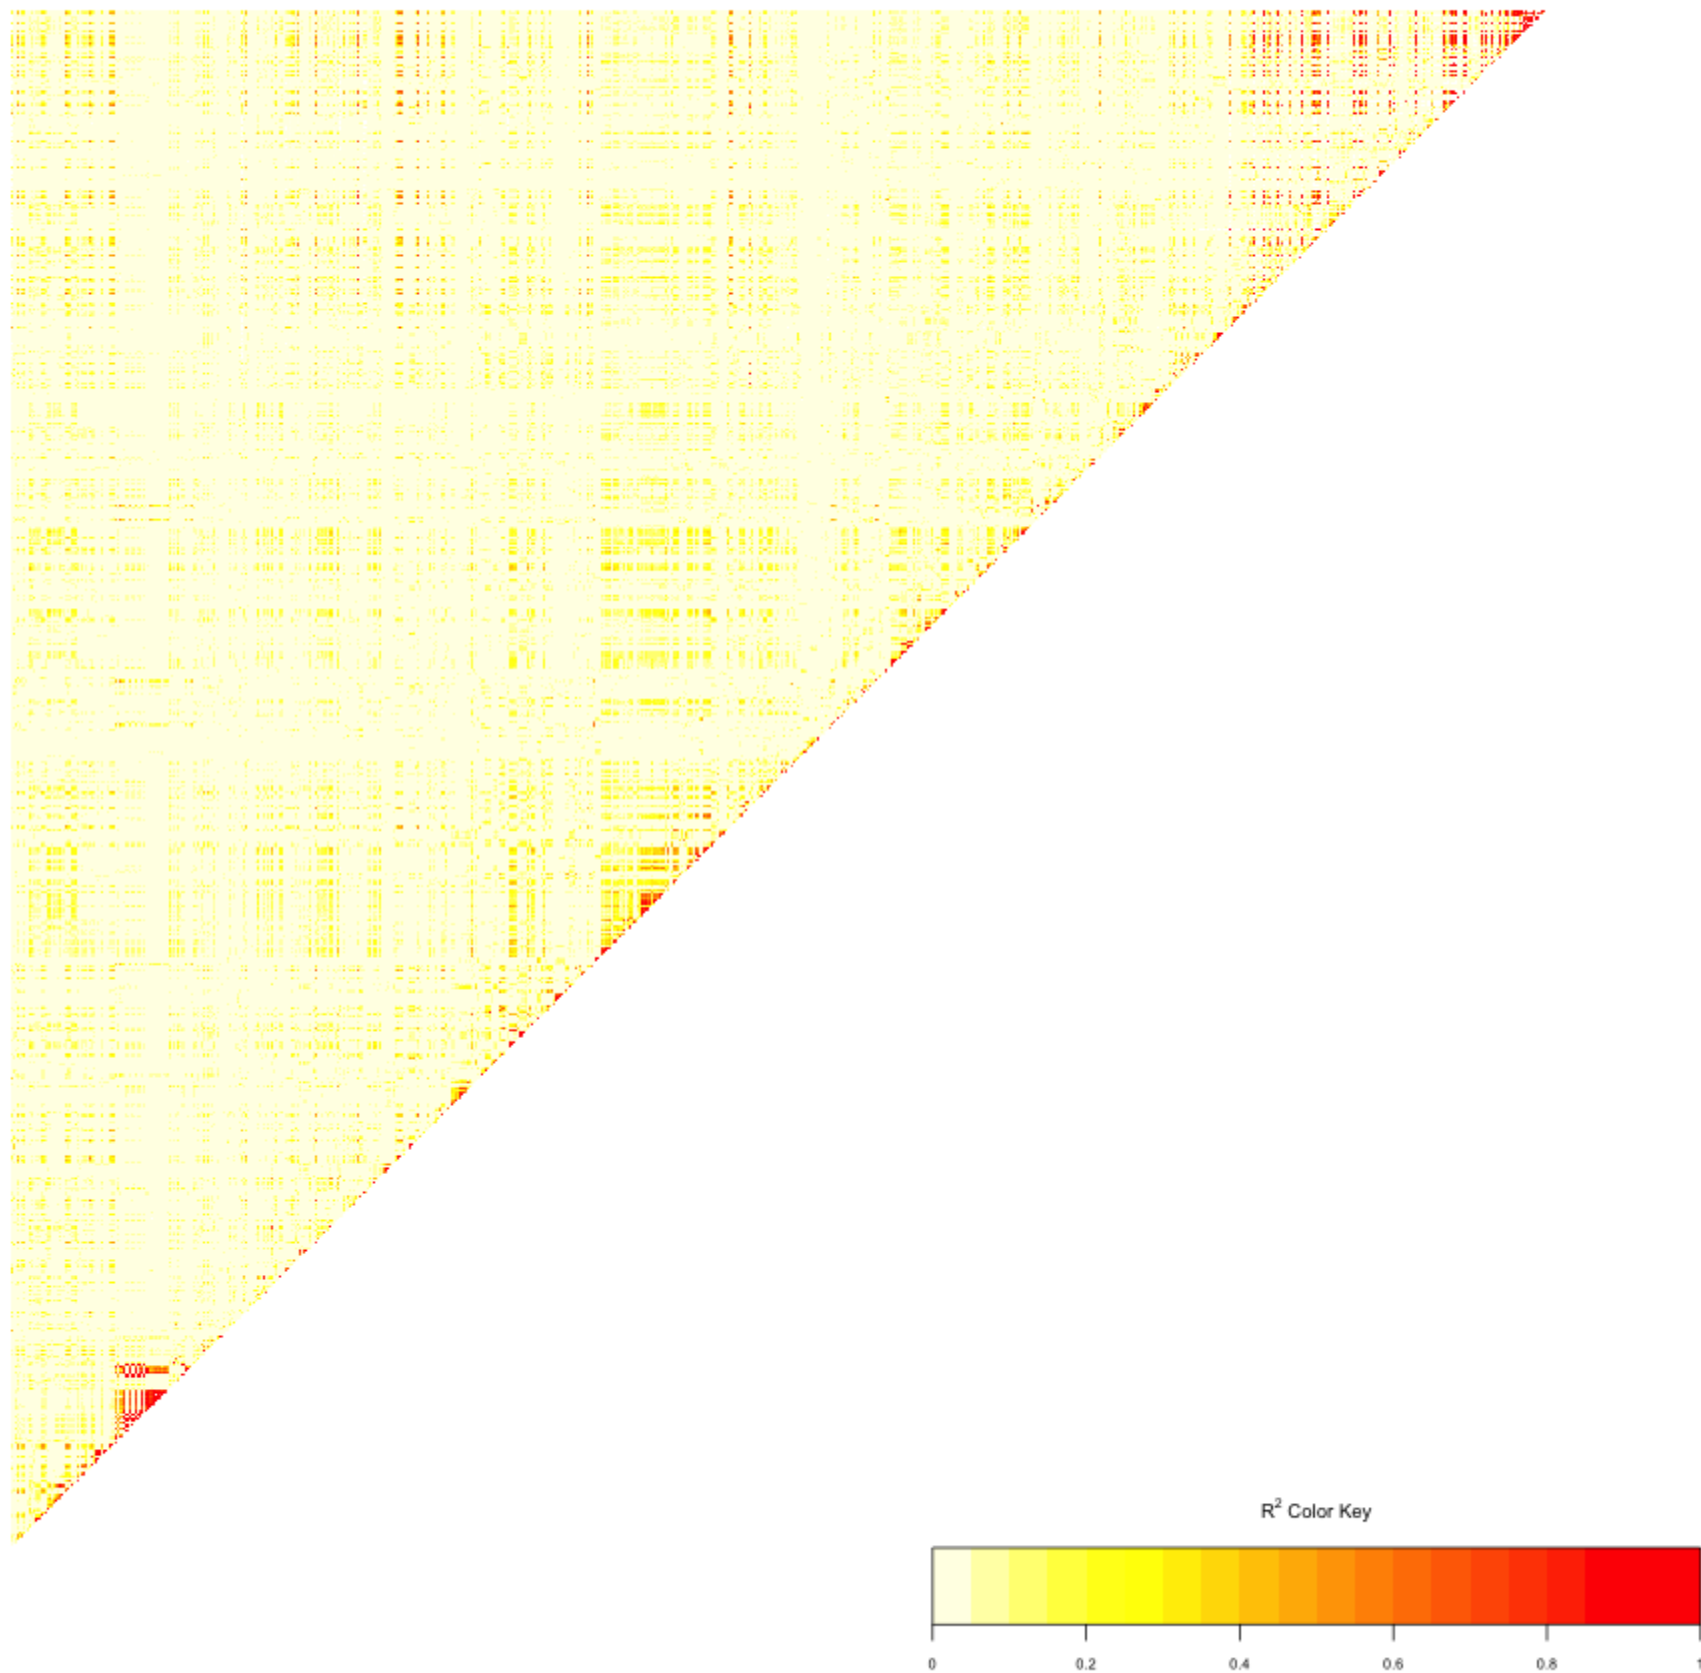

Pairwise LD in  $r^2$  with 1215 SNPs in C09 cds range 12\_to\_7631 out of 7635

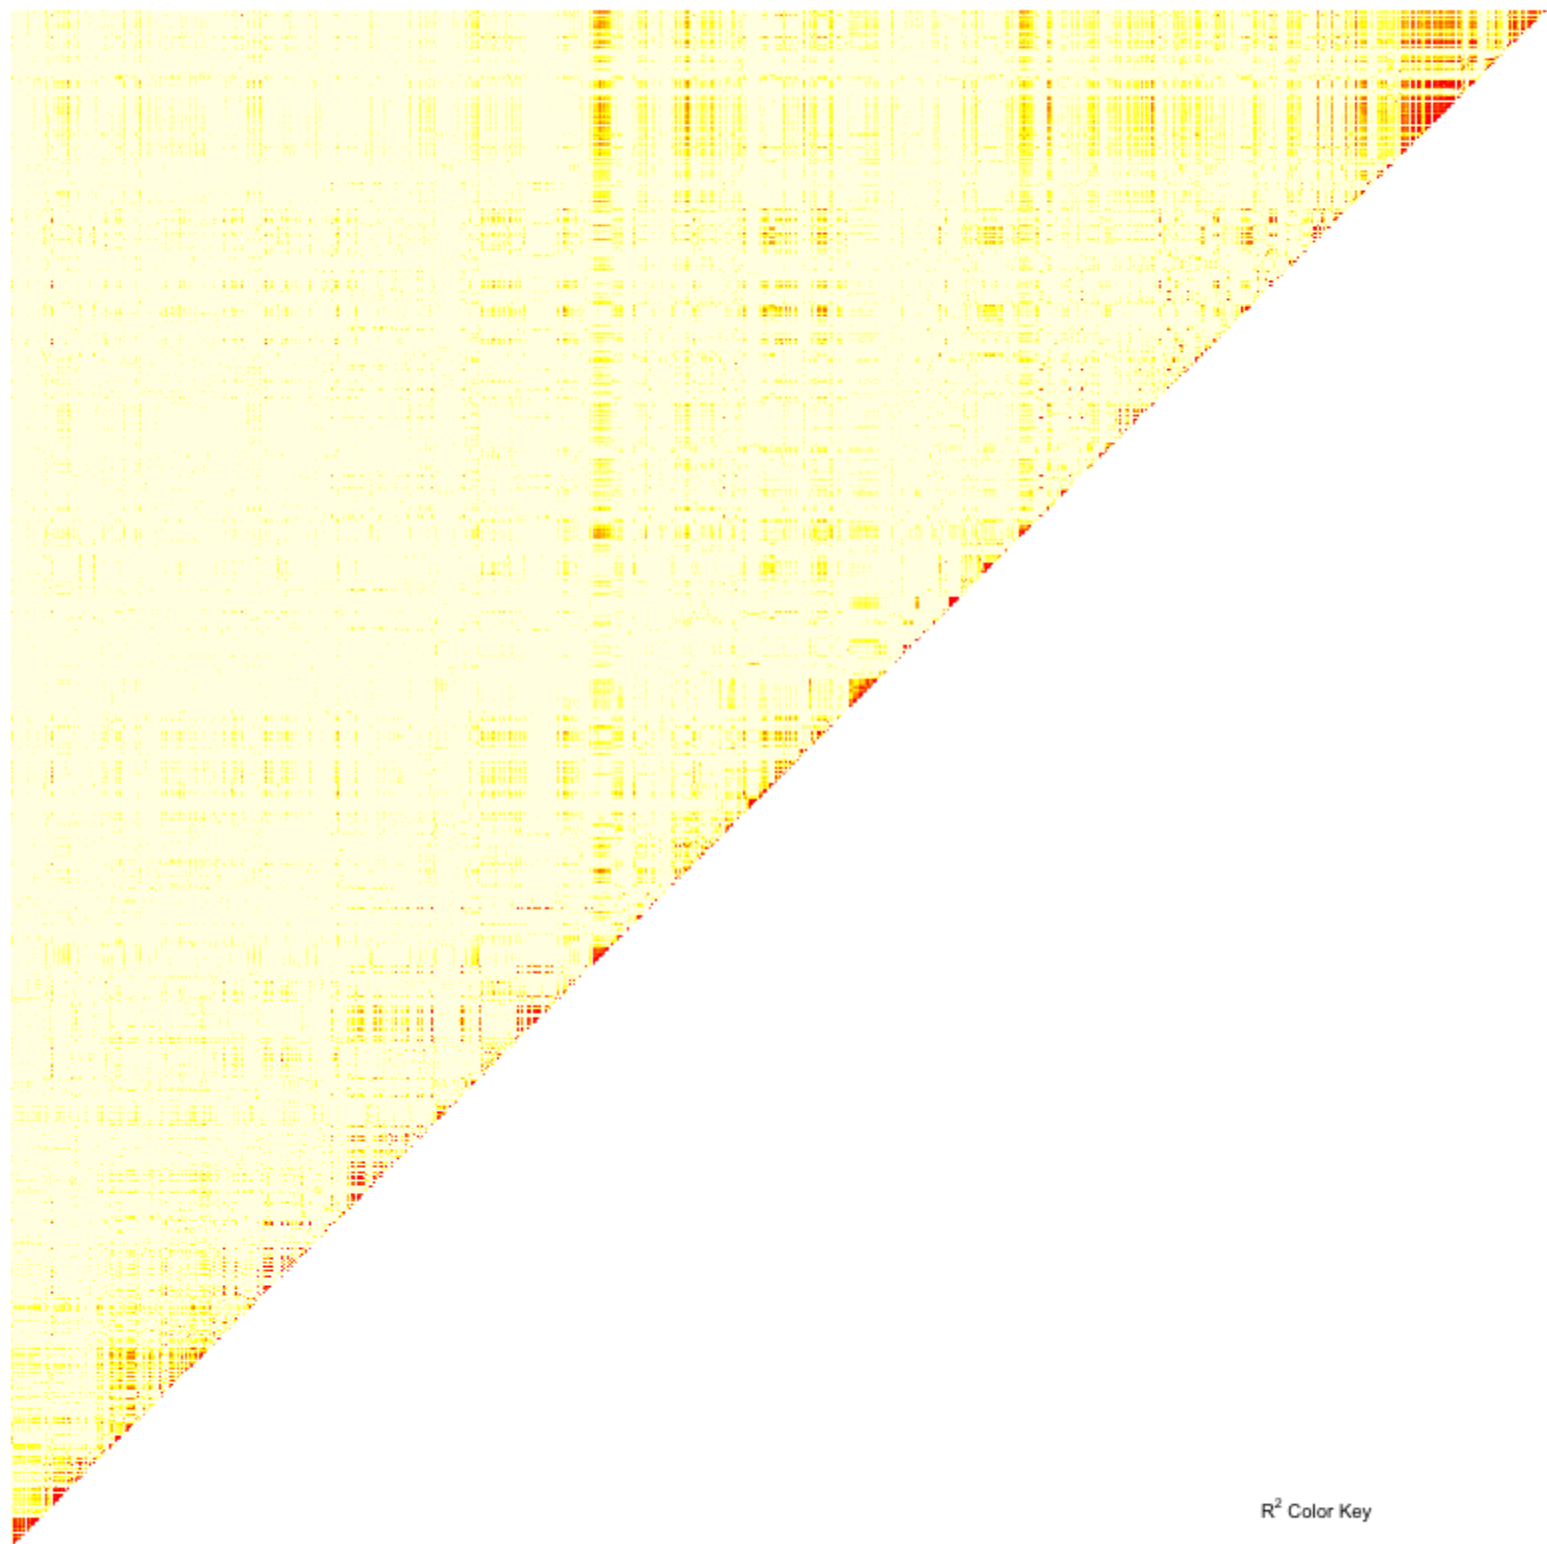

$R^2$  Color Key

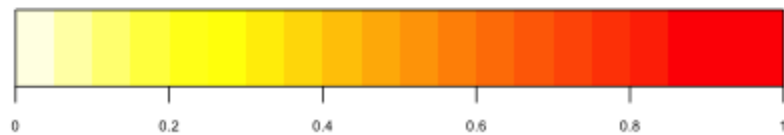

Supplement: TPJ-93-181-s001.pdf [file TPJ-93-181-s001.pdf]
