# Supplementary material for: Validation of an updated Associative Transcriptomics platform for the polyploid crop species Brassica napus by dissection of the genetic architecture of erucic acid and tocopherol isoform variation in seeds
Source: PubMed Central journal article supplement (PMC5767744; doi:10.1111/tpj.13767), 2017-12-02

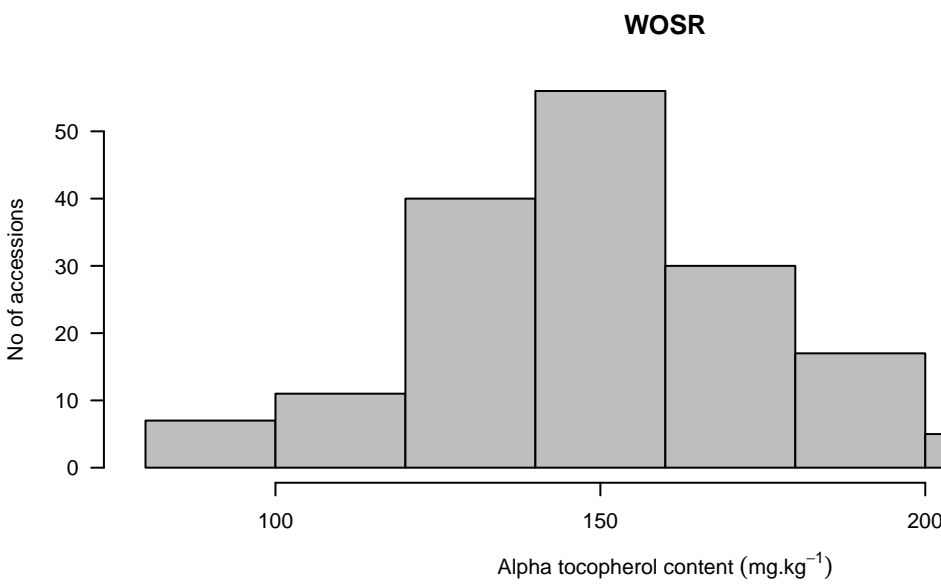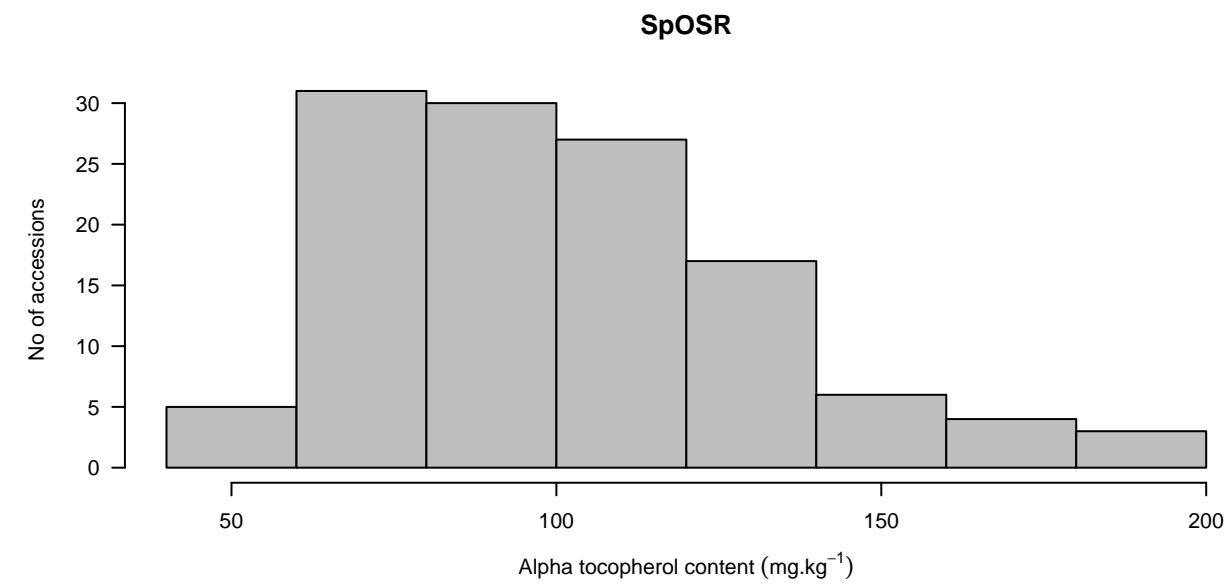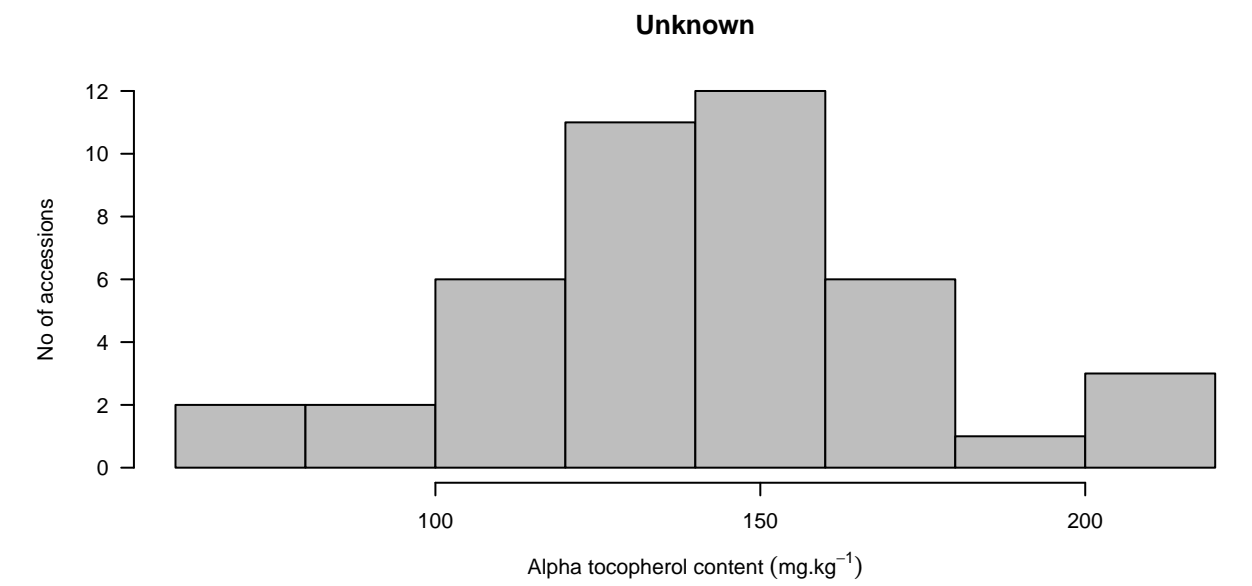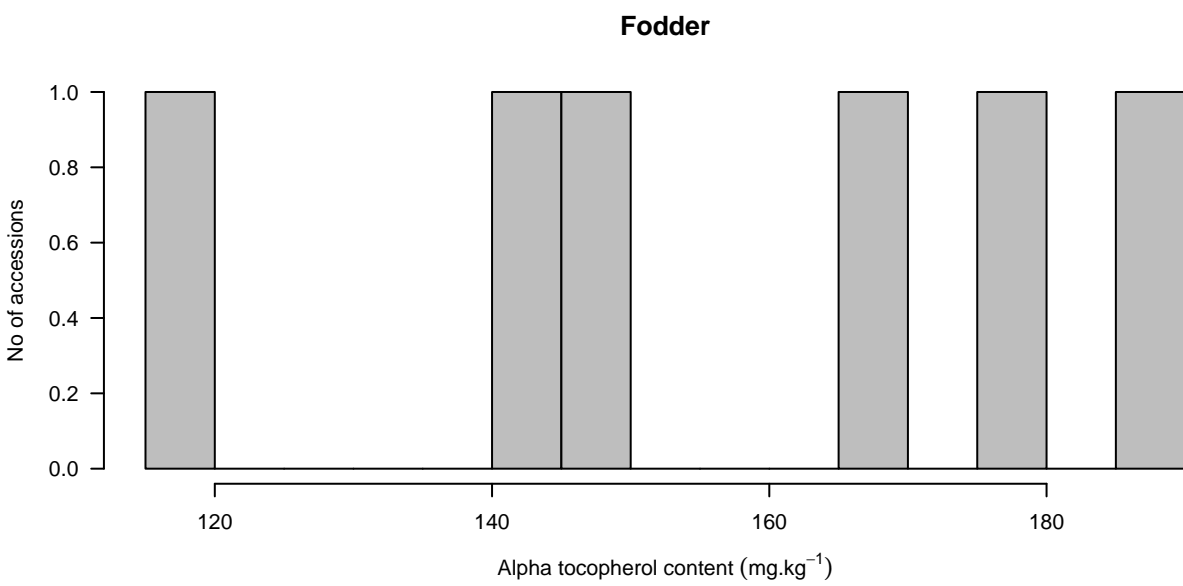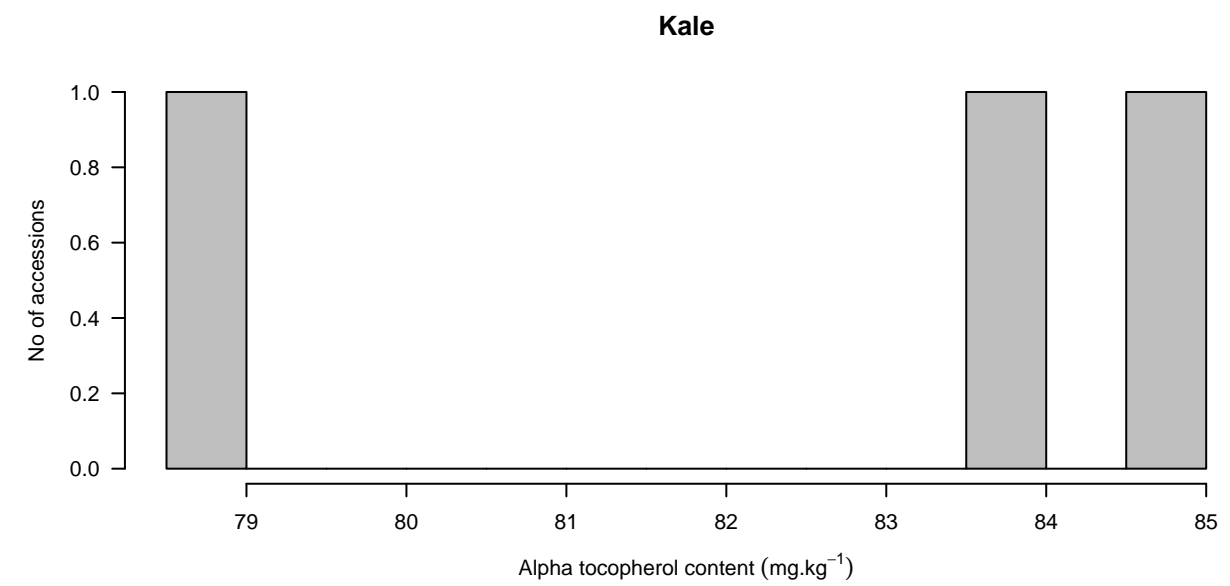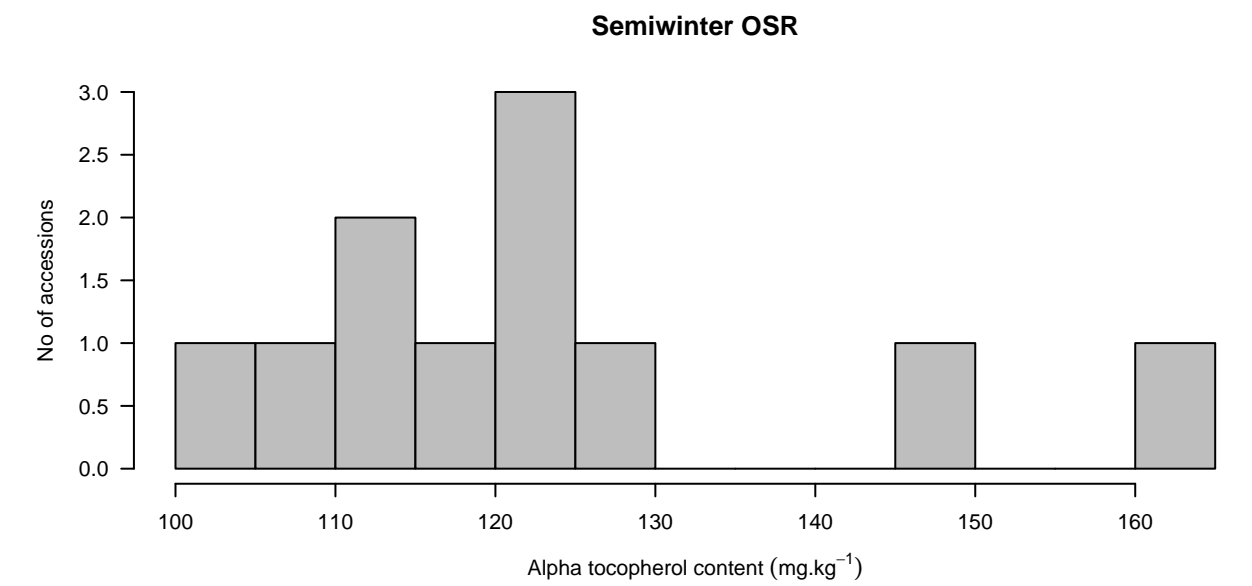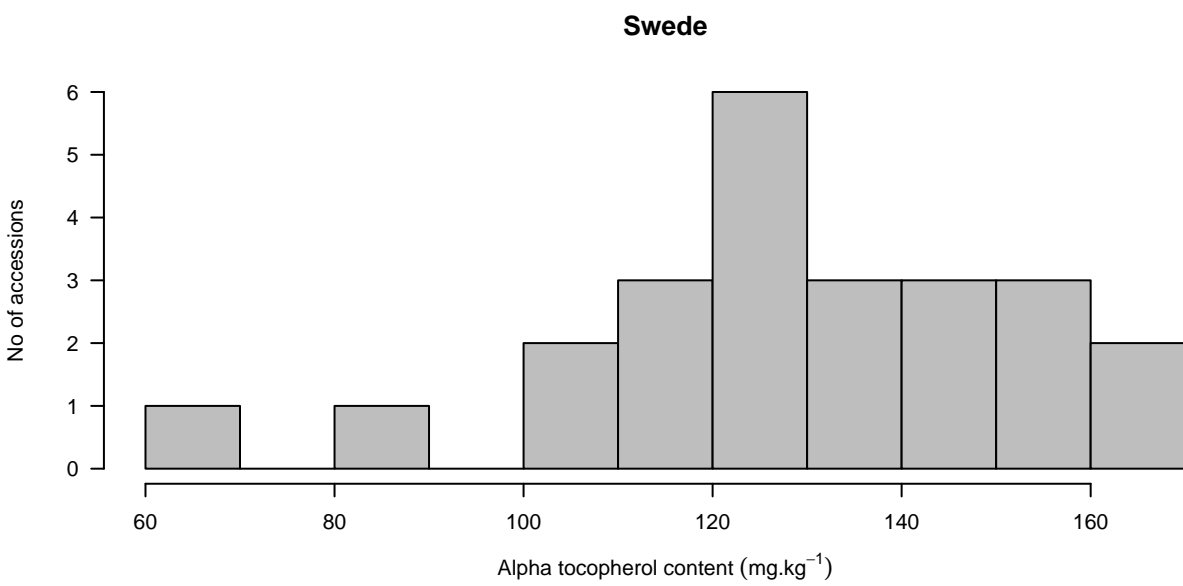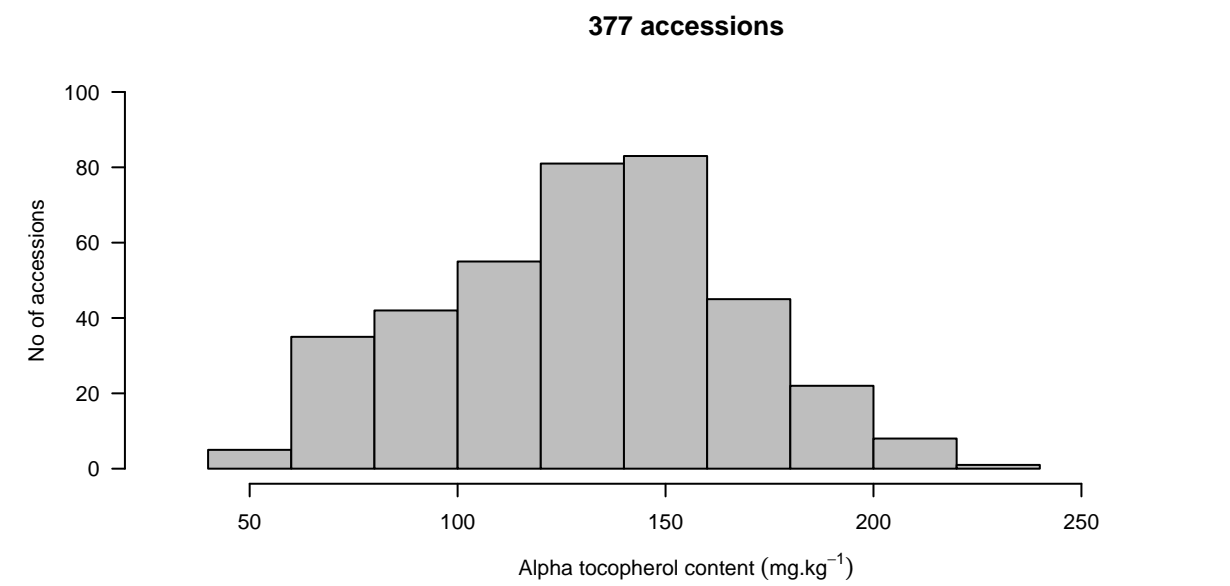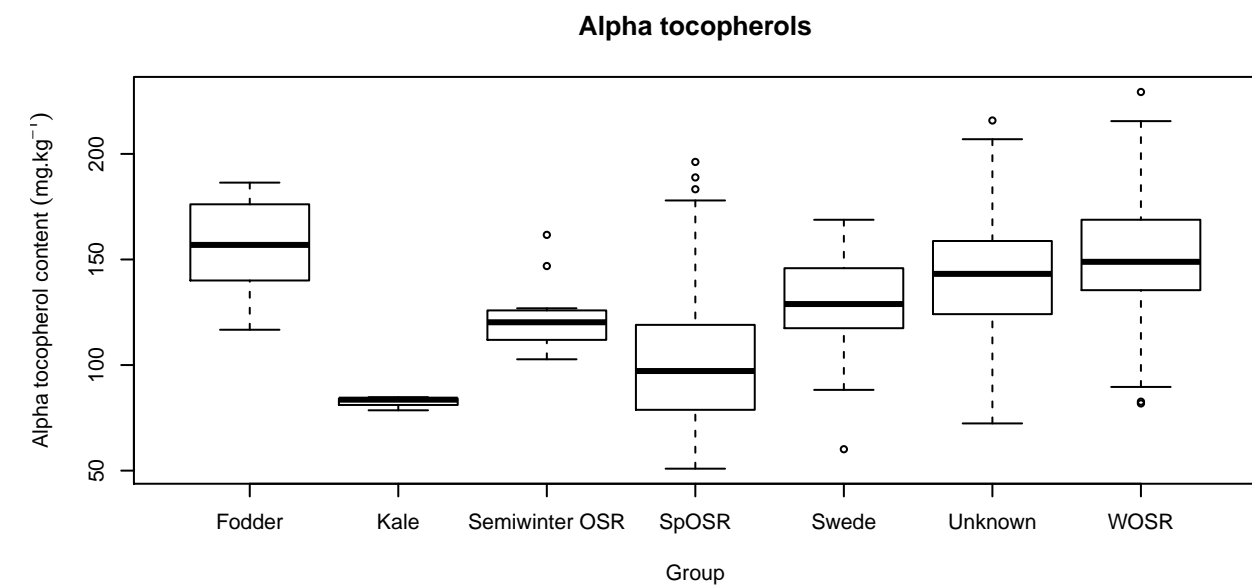

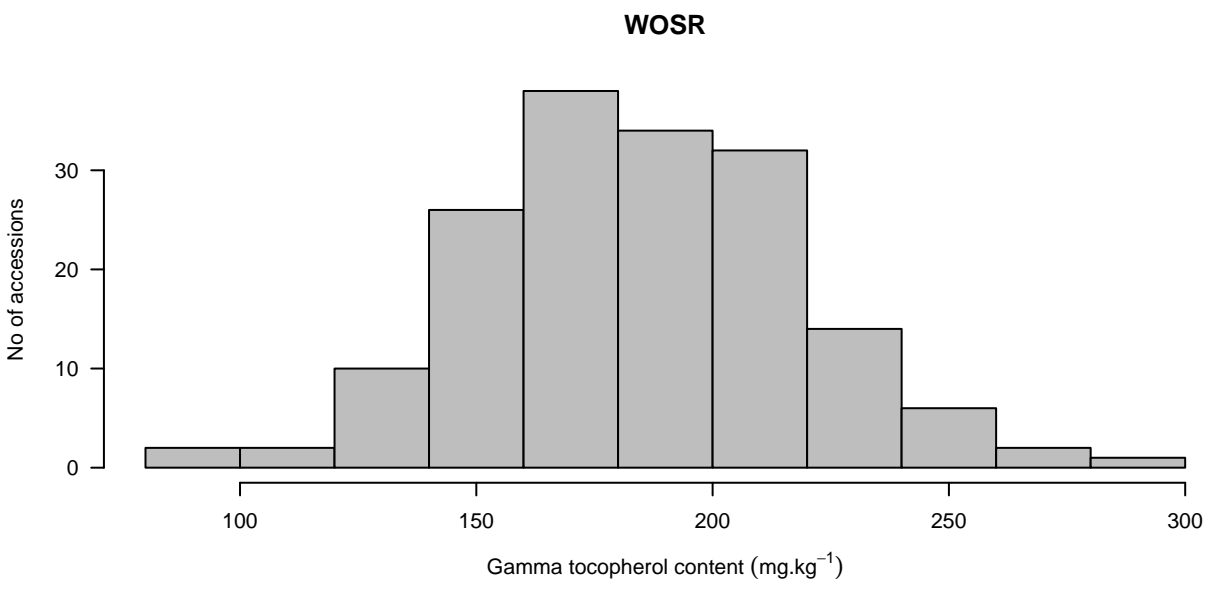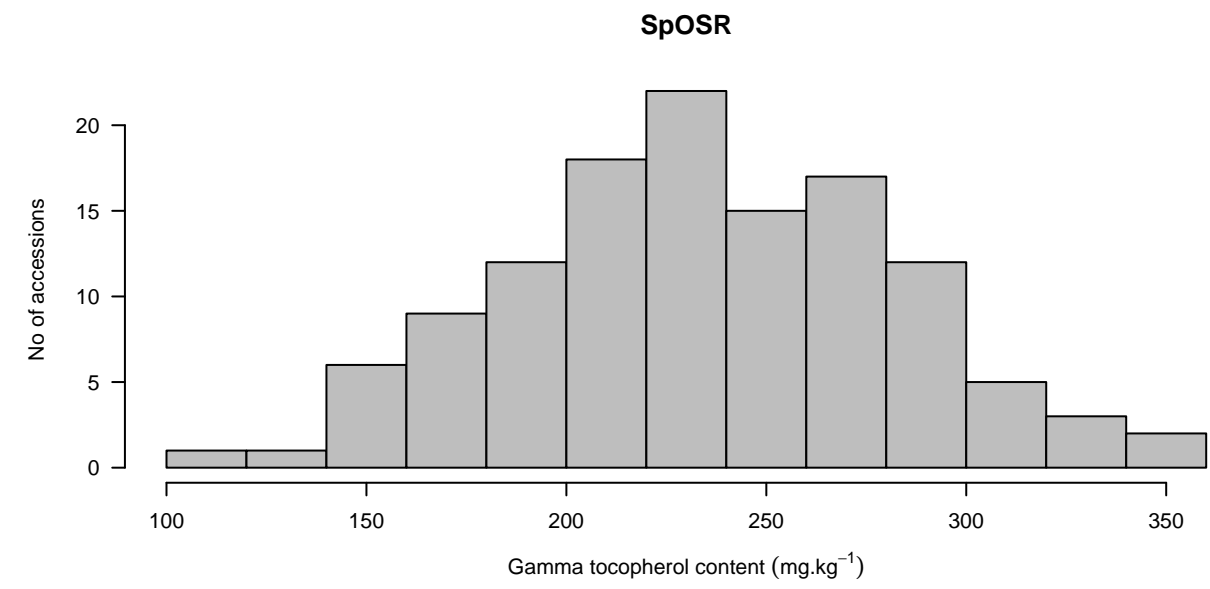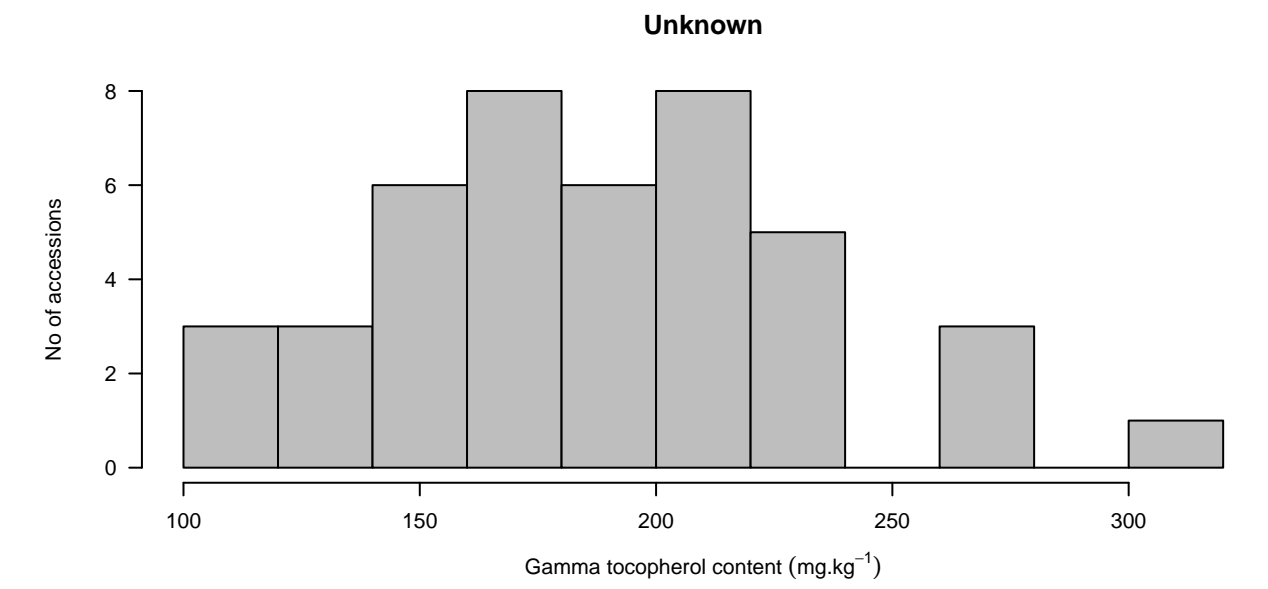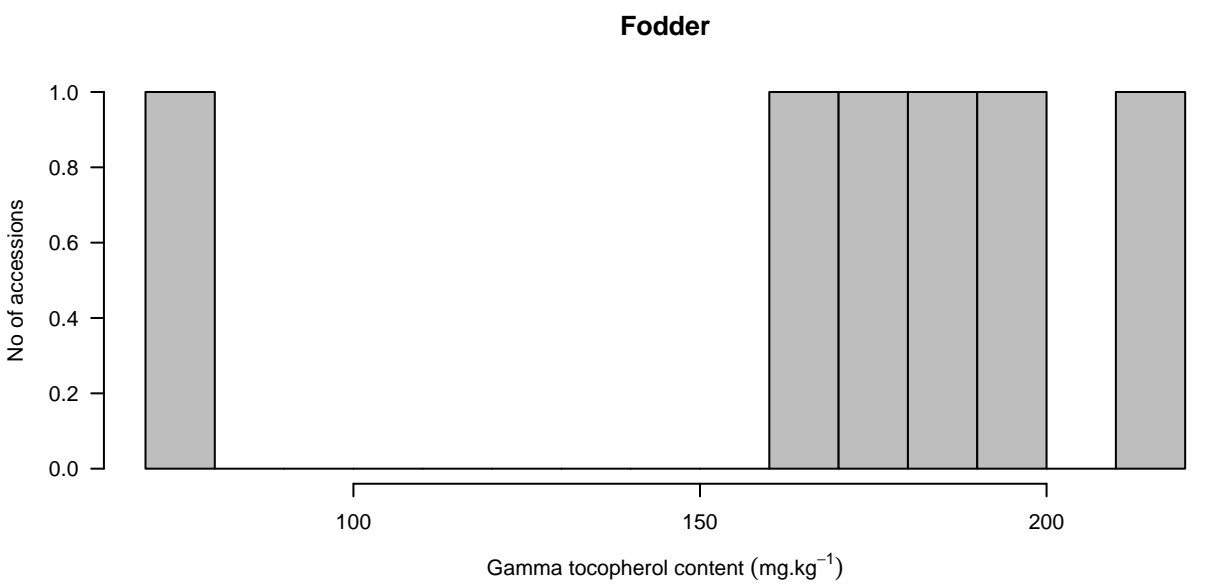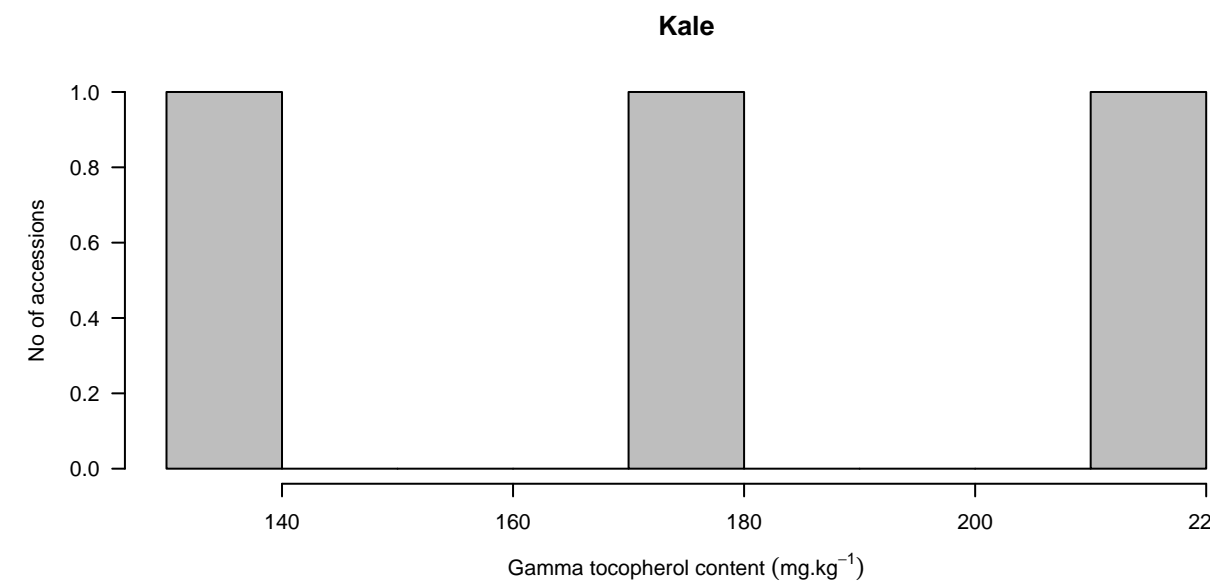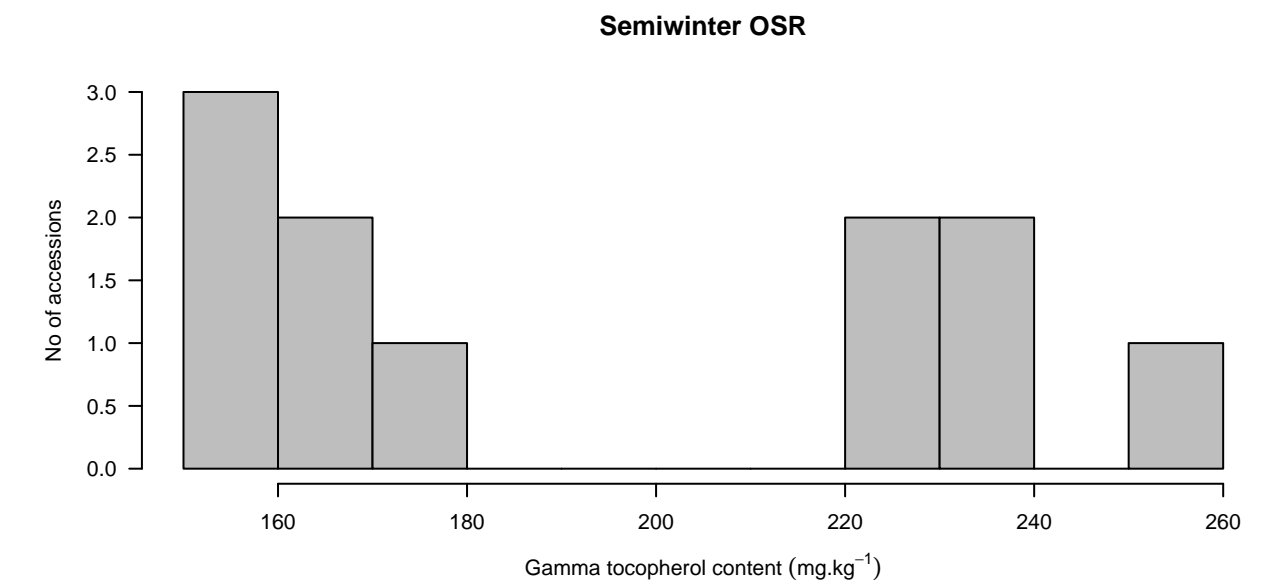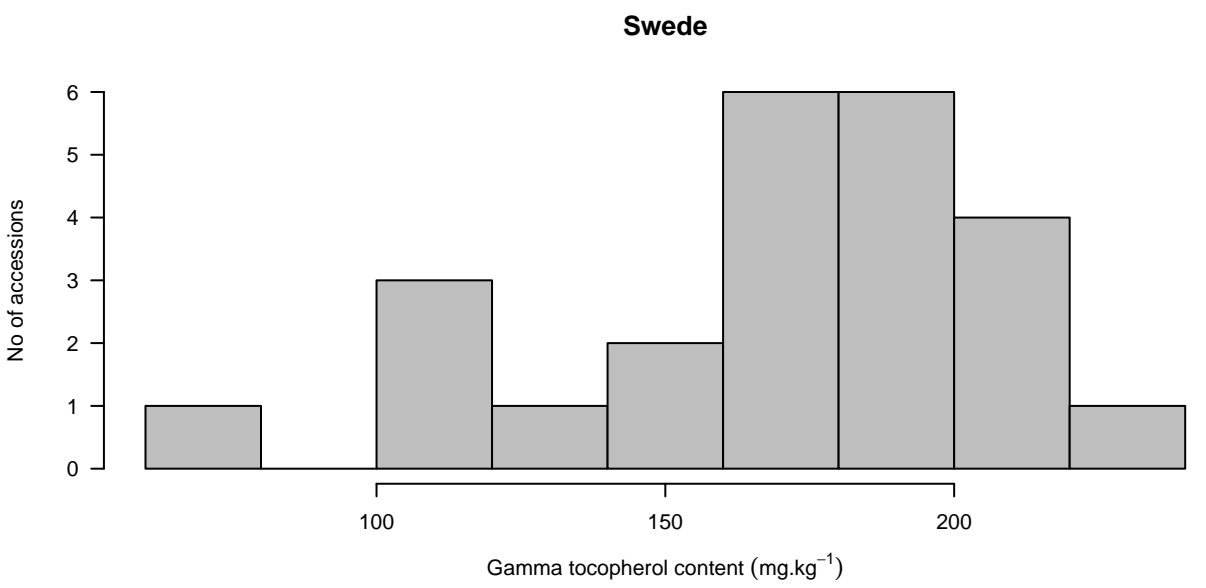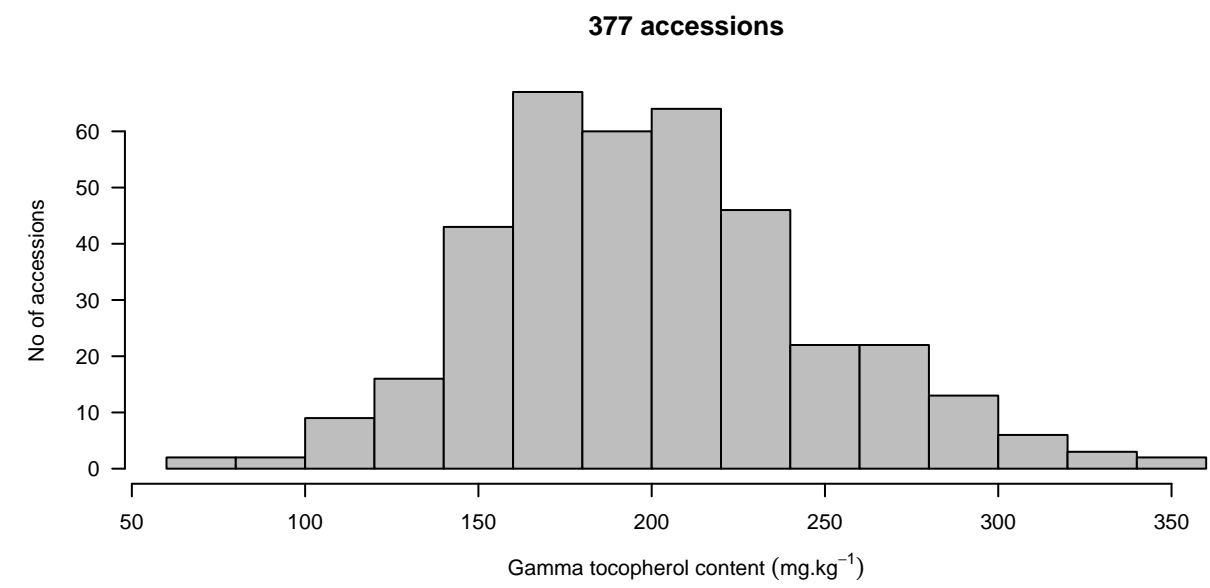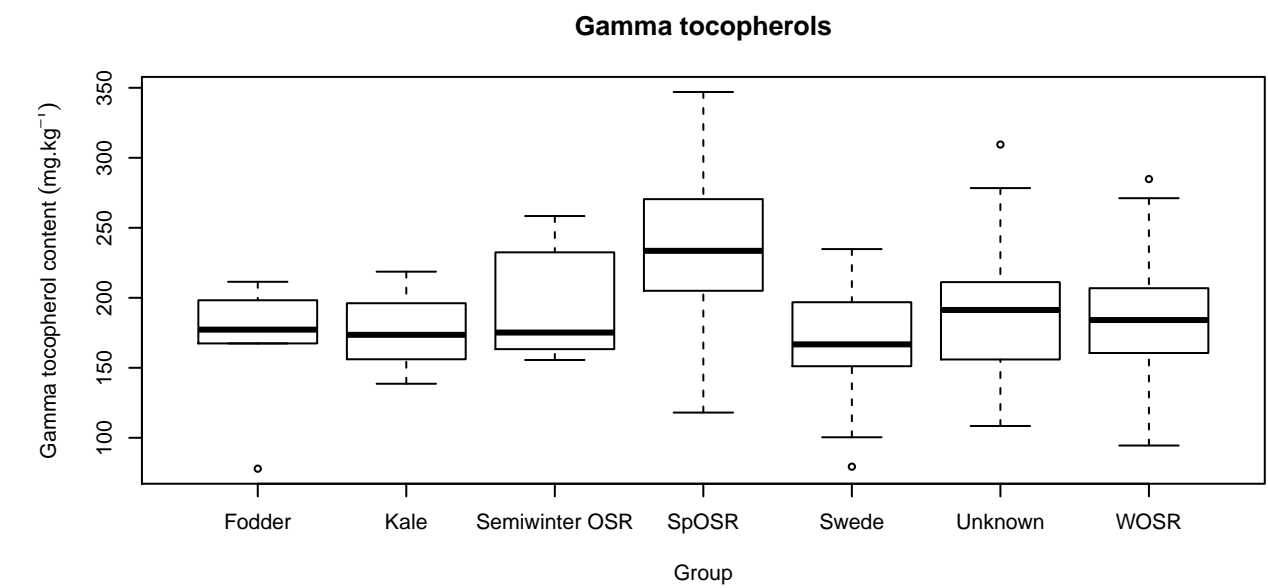

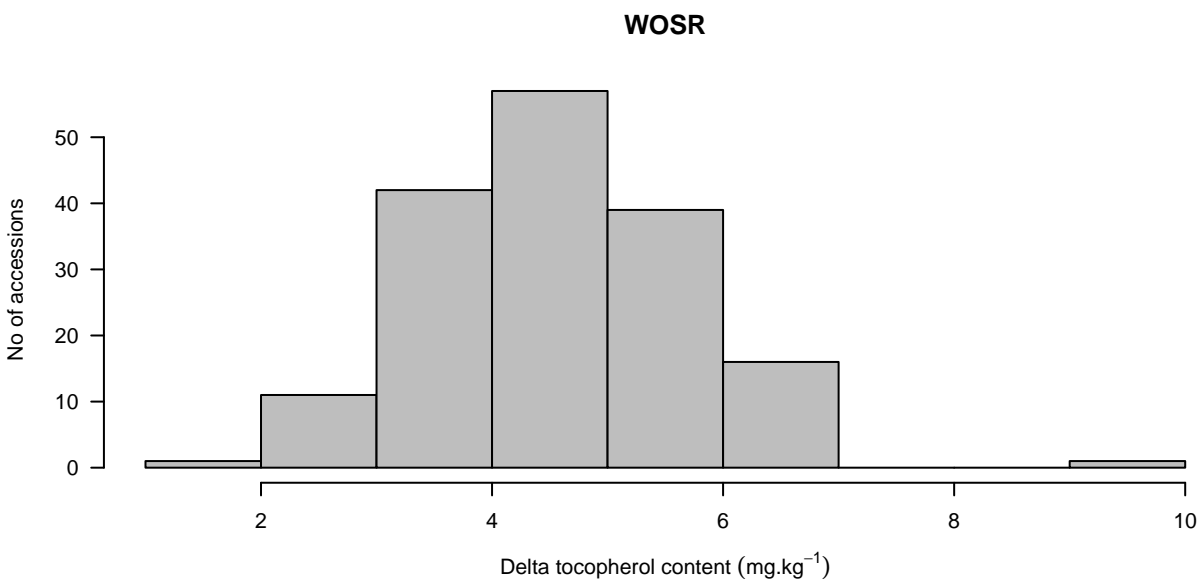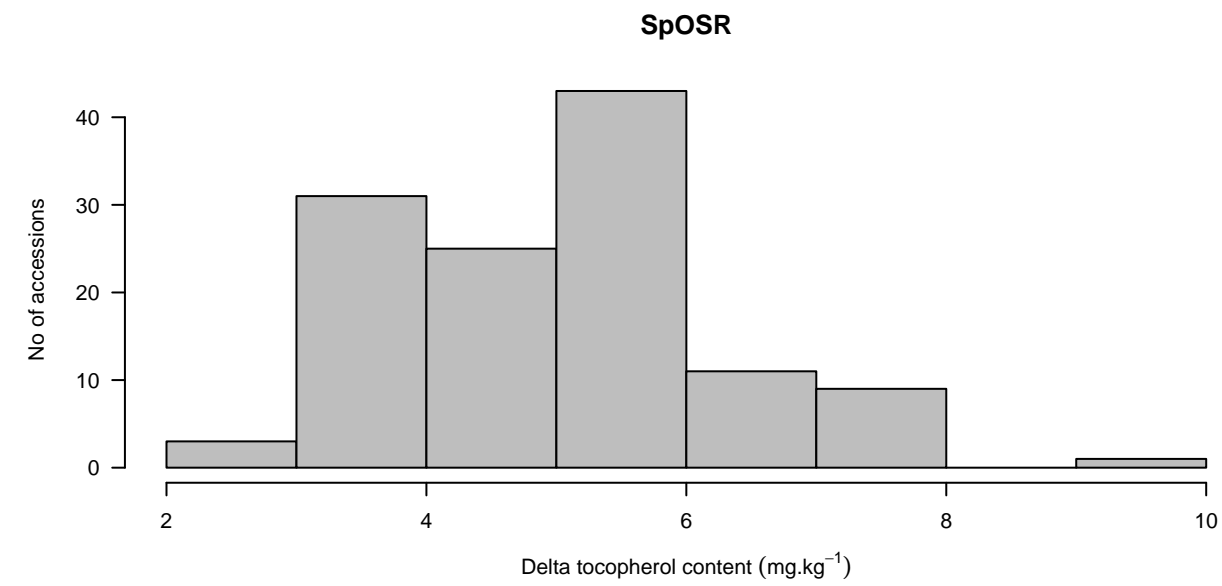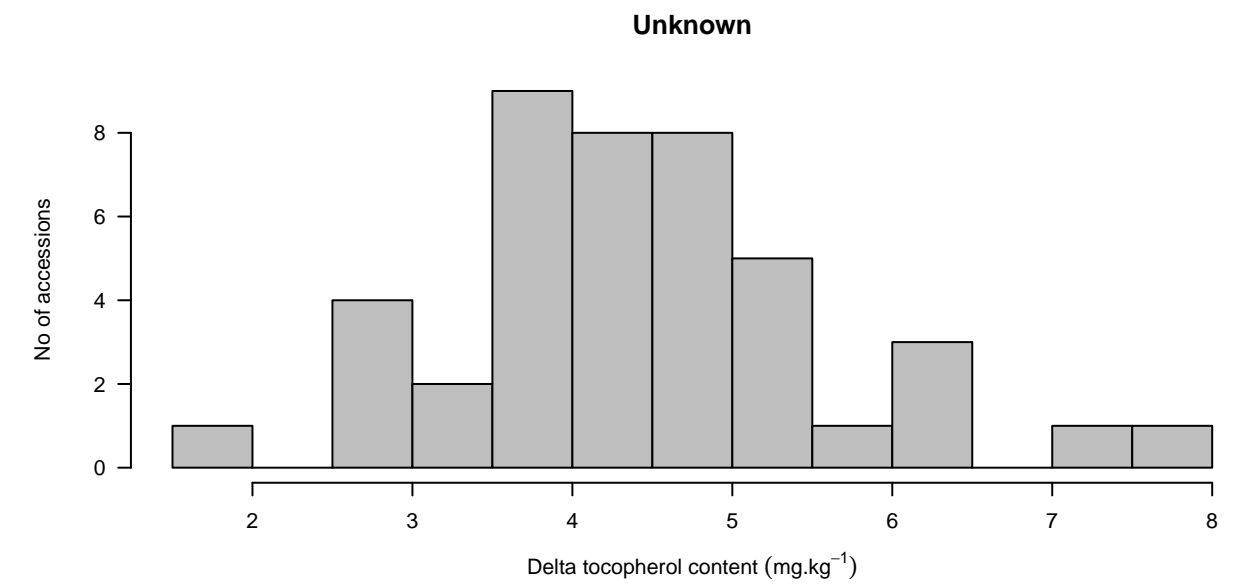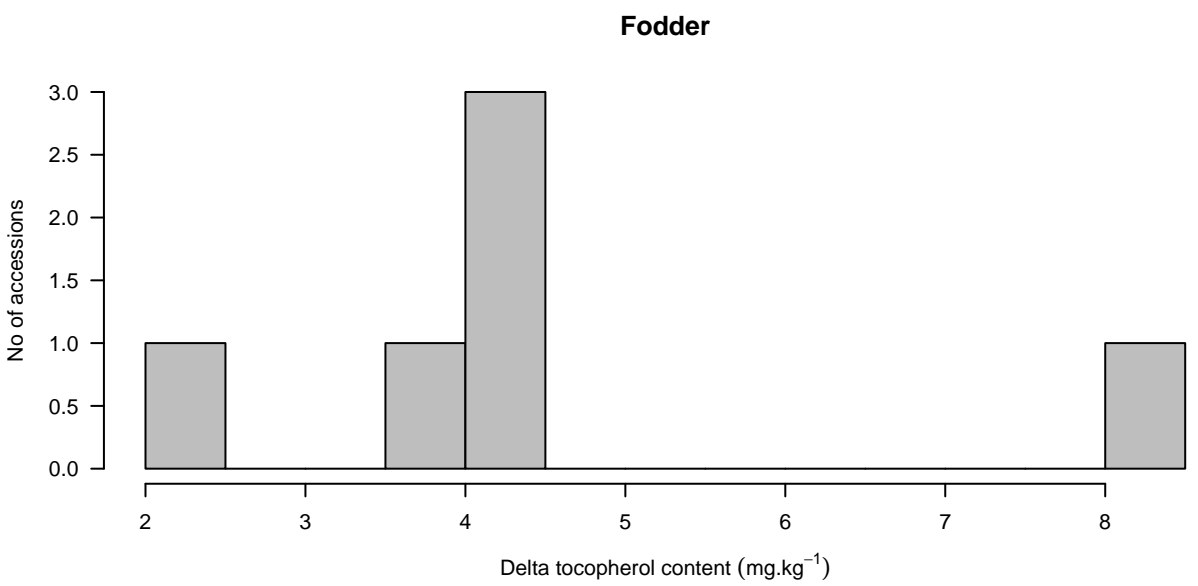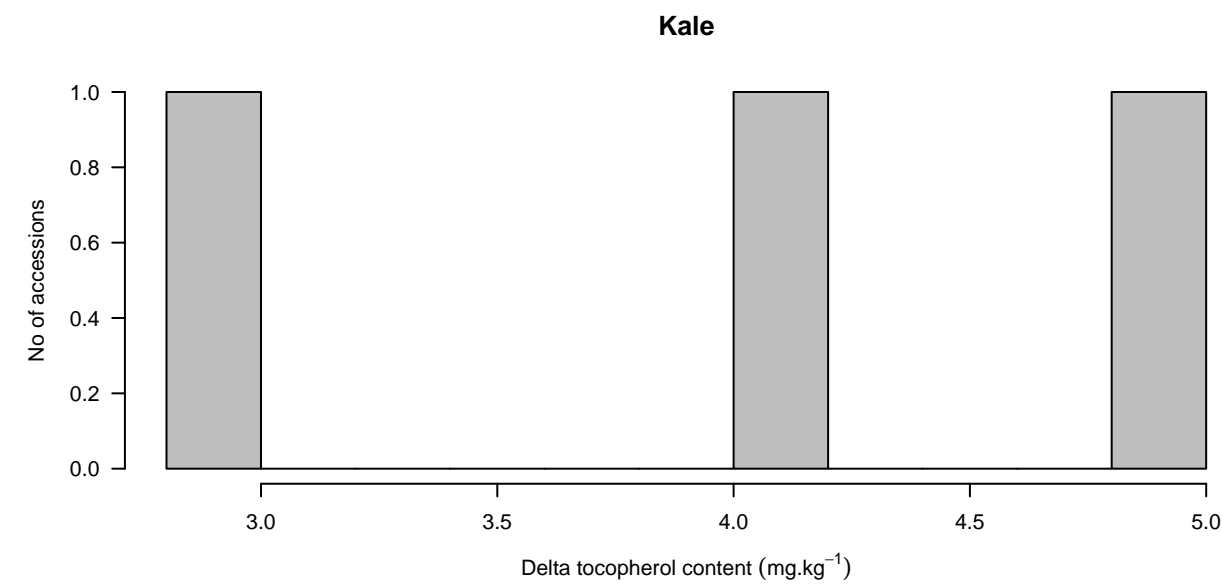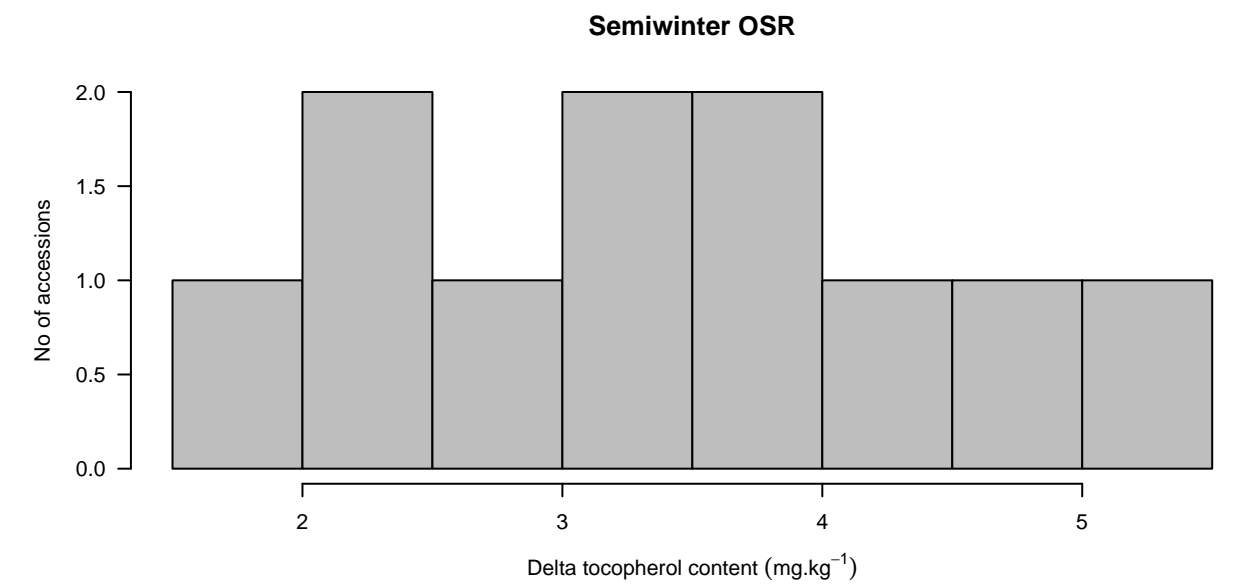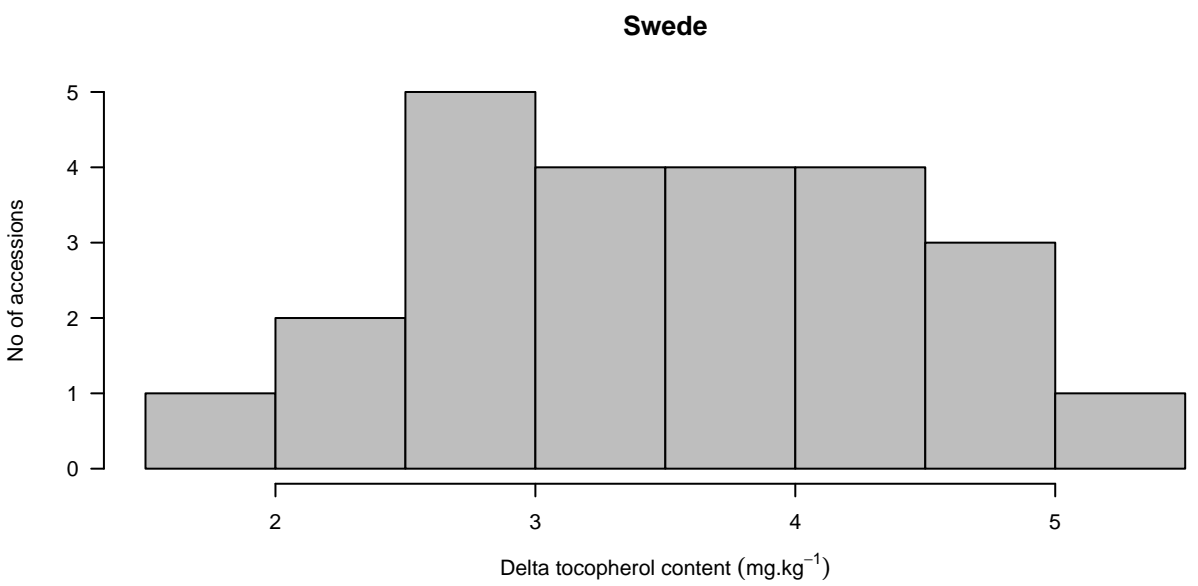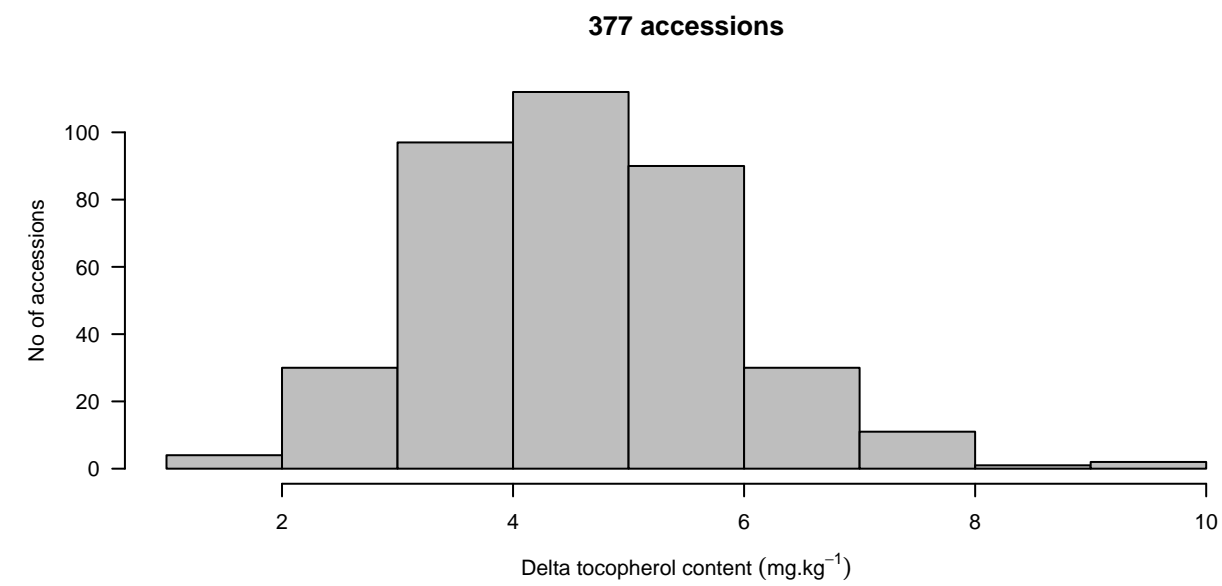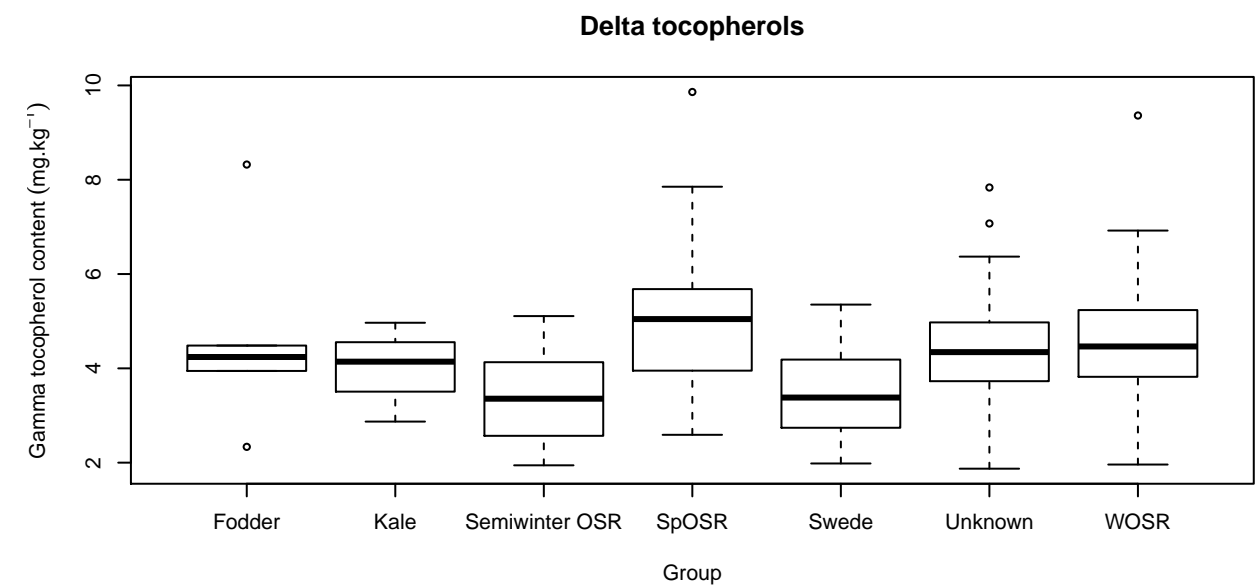

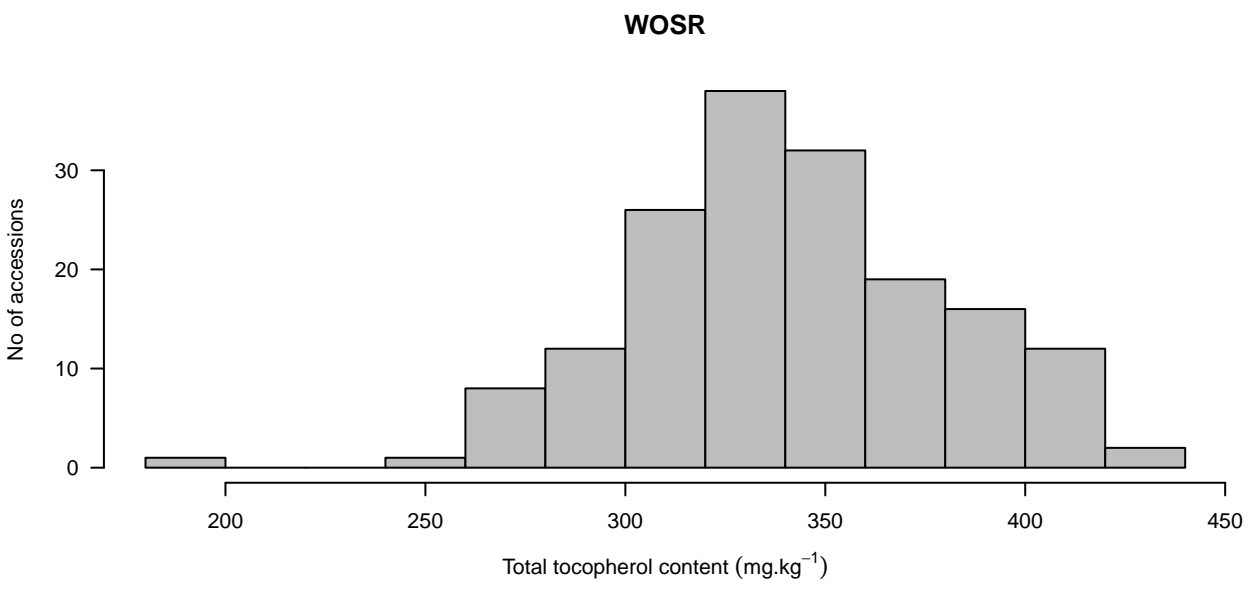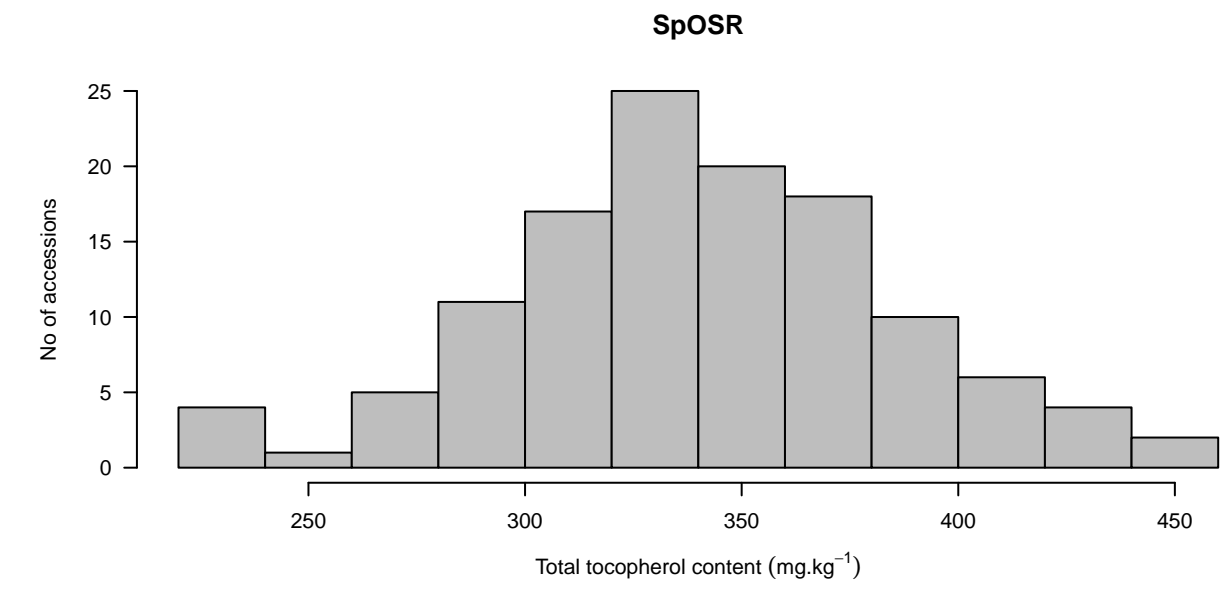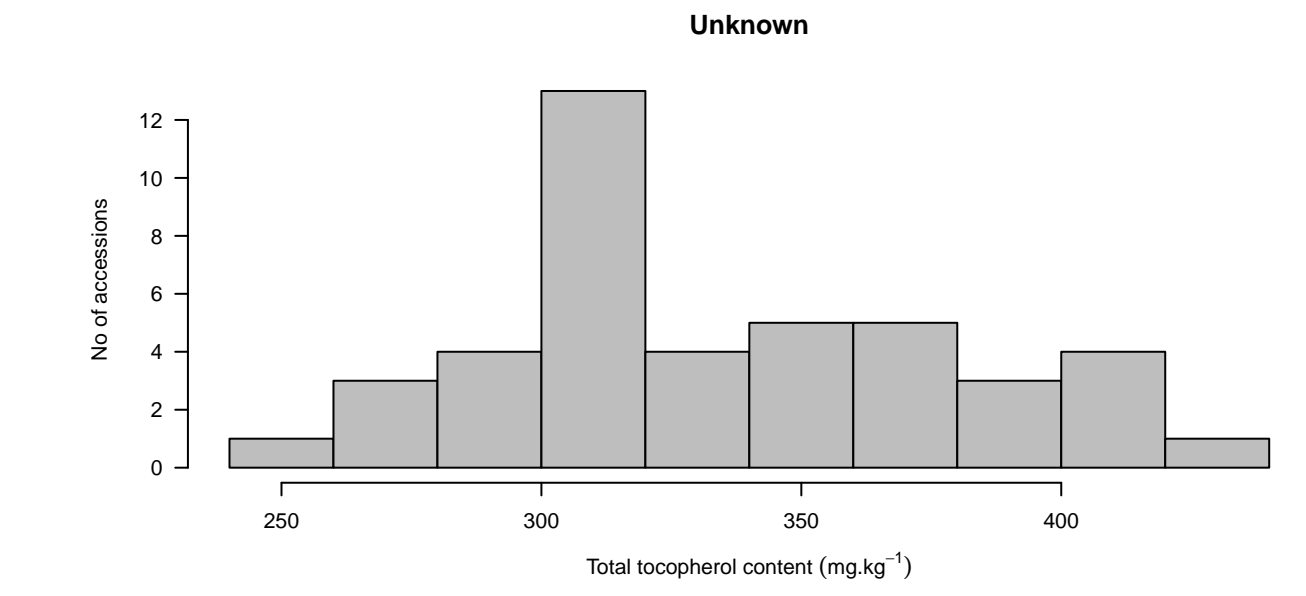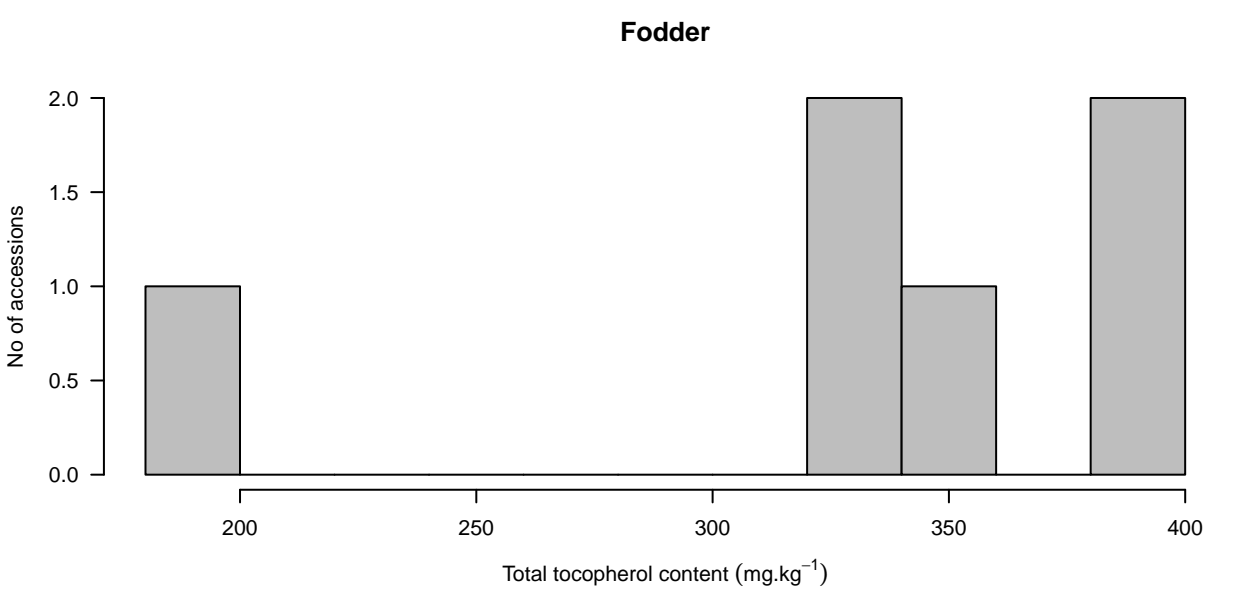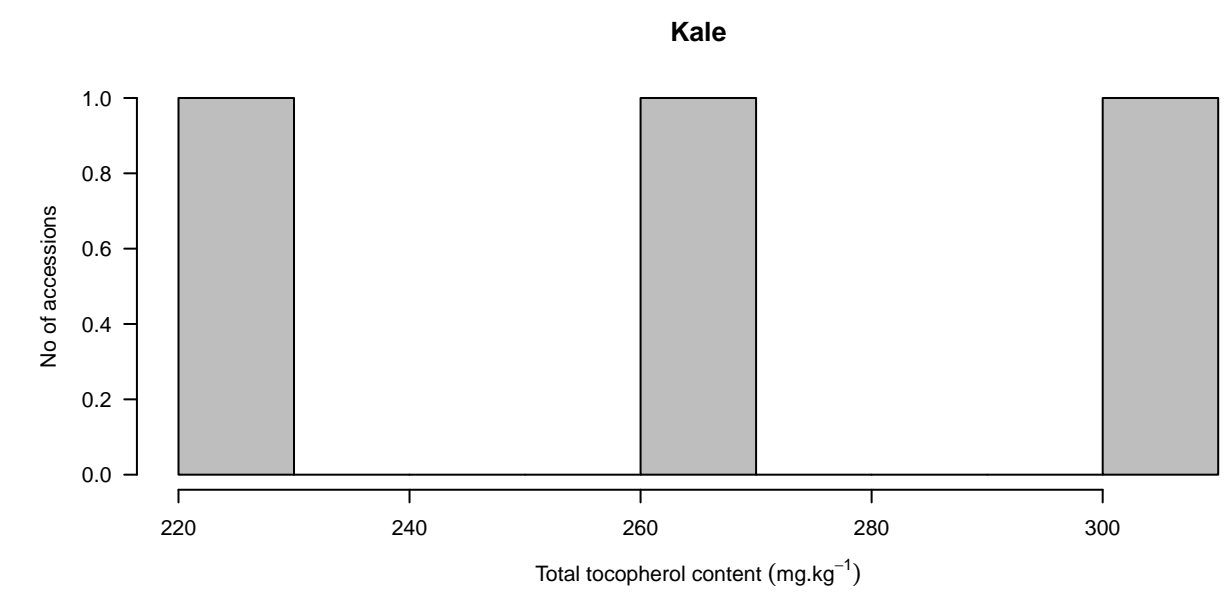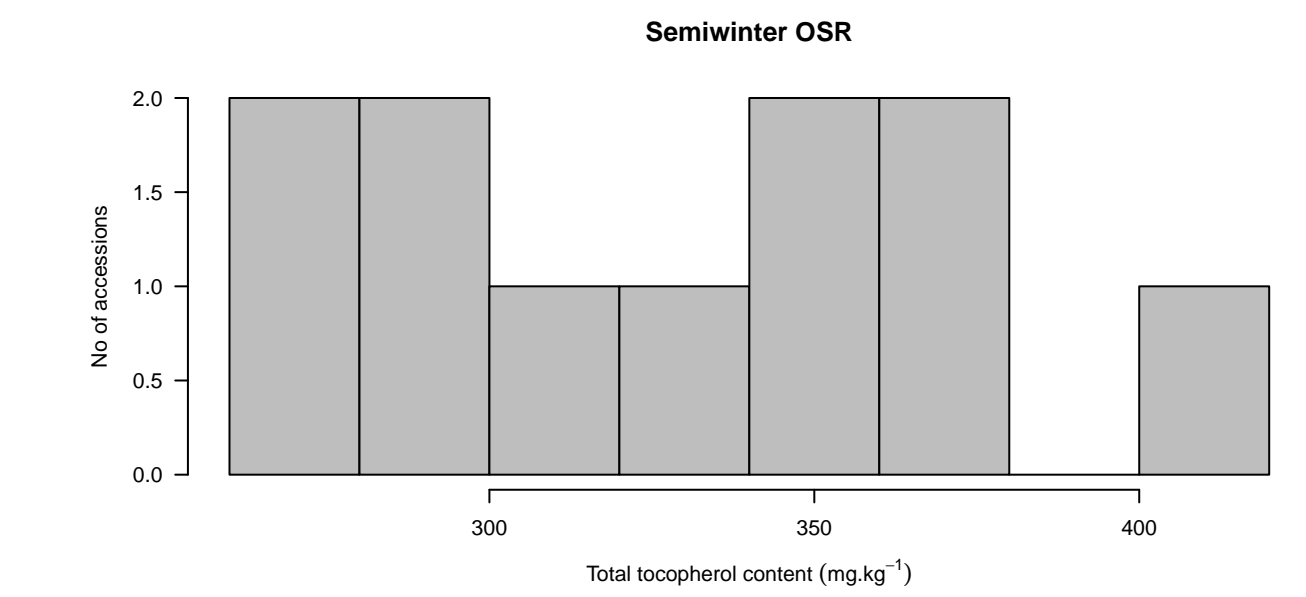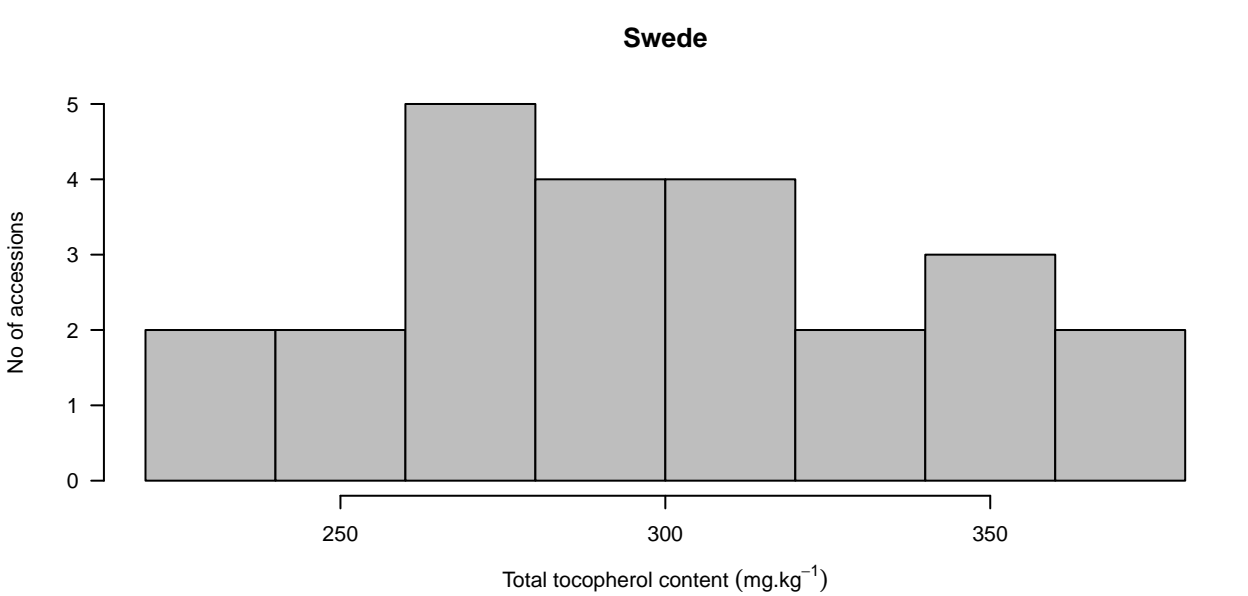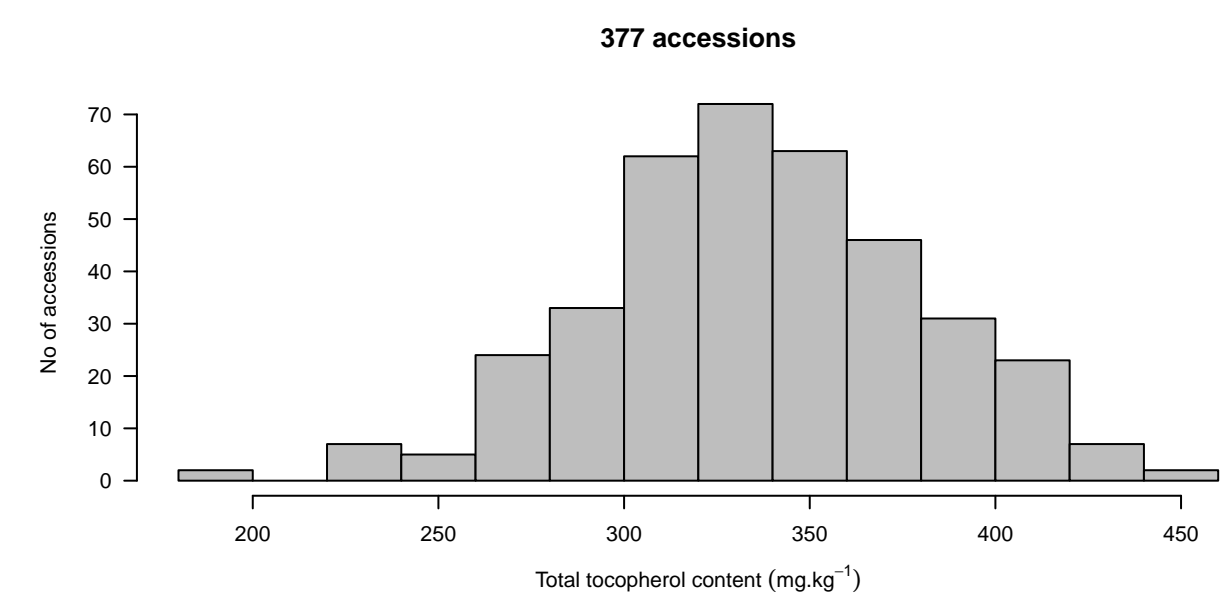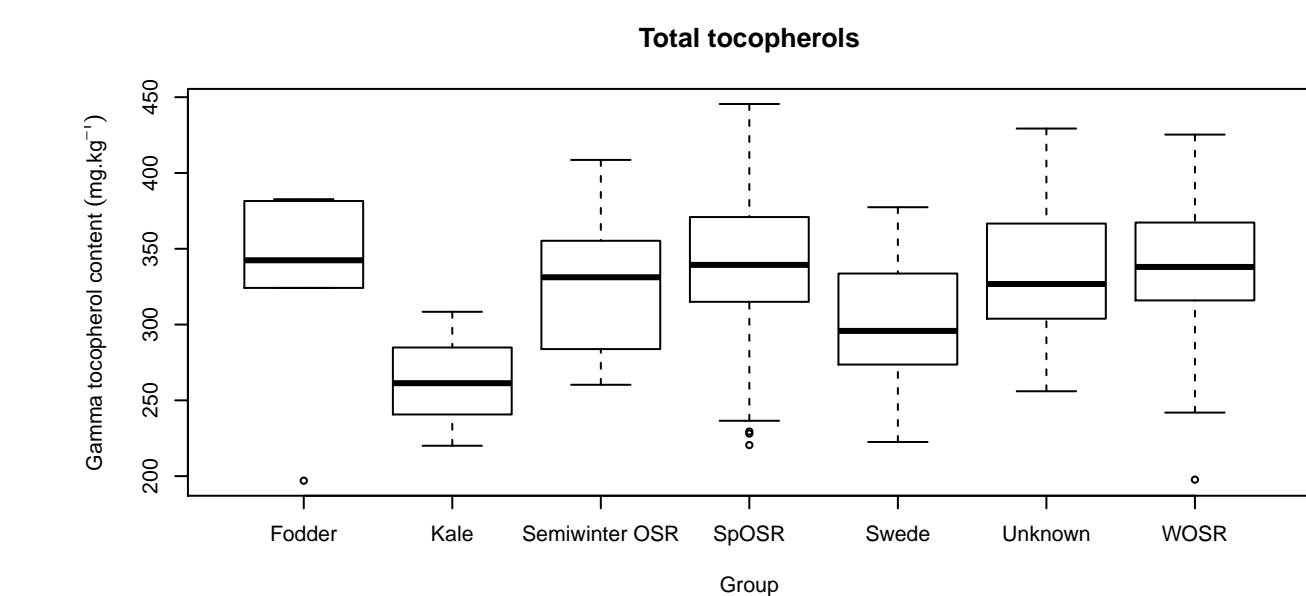

Supplement: TPJ-93-181-s002.pdf [file TPJ-93-181-s002.pdf]
