# Supplementary material for: Validation of an updated Associative Transcriptomics platform for the polyploid crop species Brassica napus by dissection of the genetic architecture of erucic acid and tocopherol isoform variation in seeds
Source: PubMed Central journal article supplement (PMC5767744; doi:10.1111/tpj.13767), 2017-12-02
Supplement: TPJ-93-181-s003.pdf [file TPJ-93-181-s003.pdf]

**Adjusted pvalues  
with lambda = 8.69478274232989**

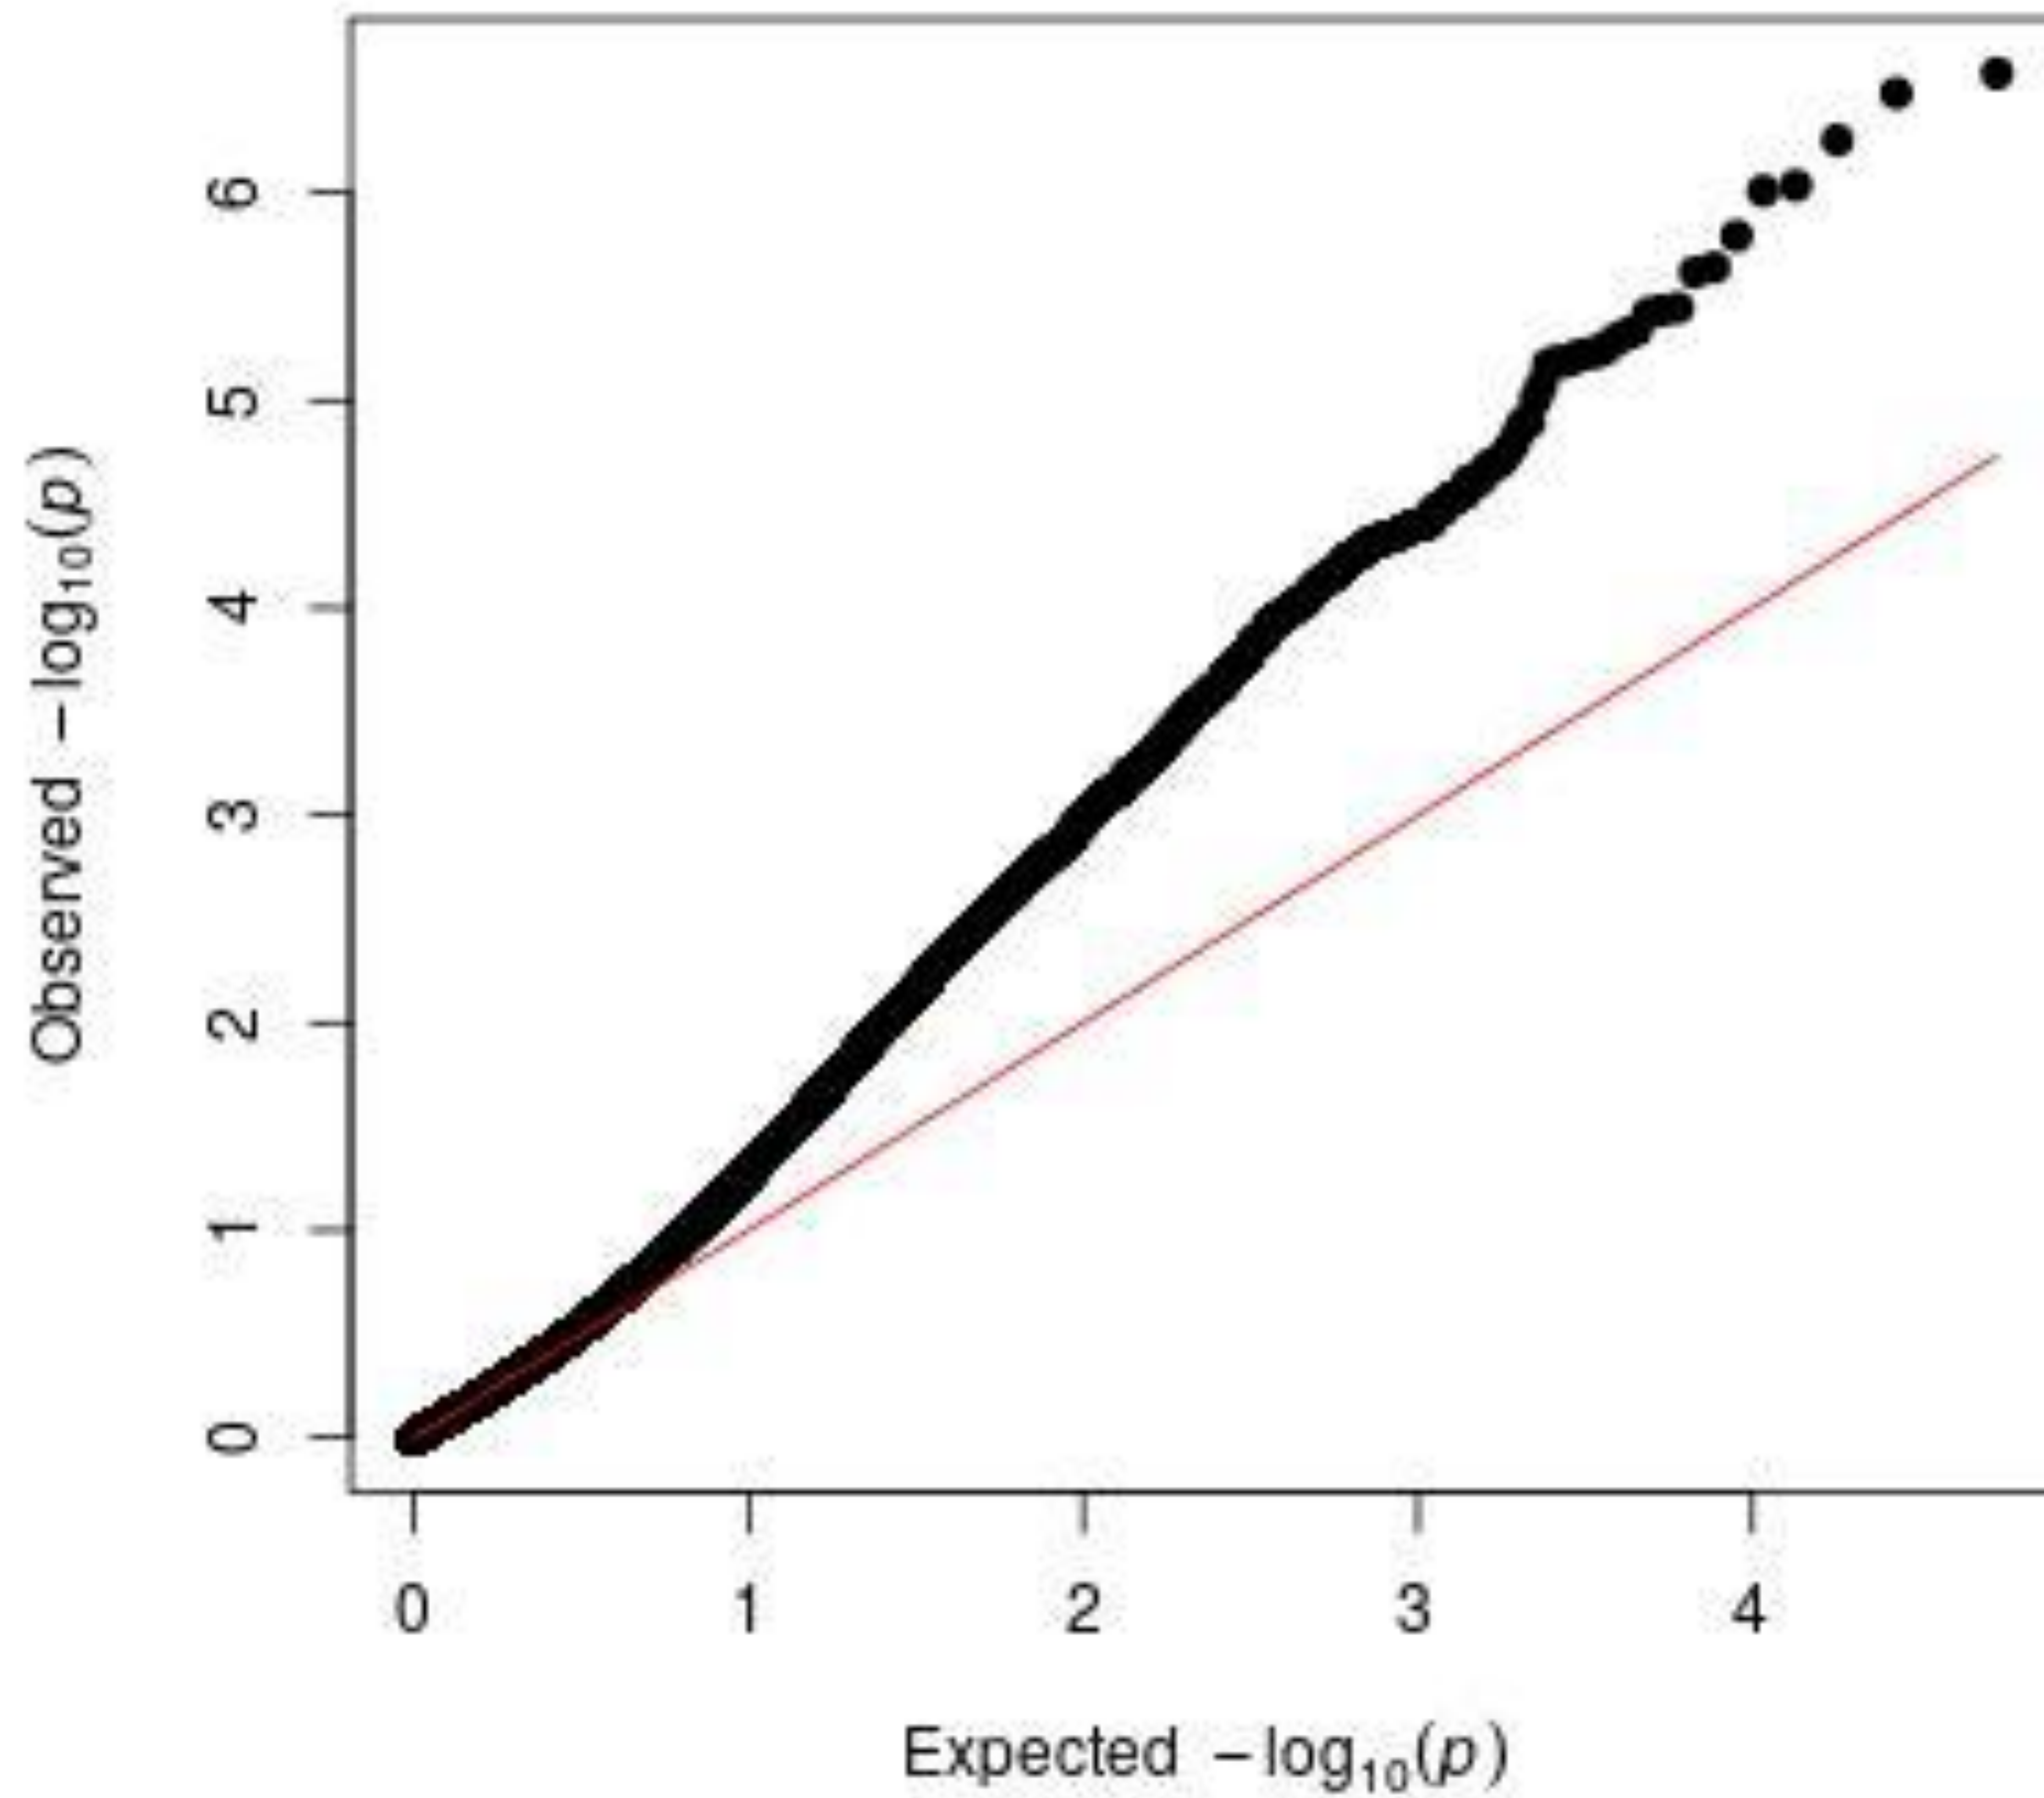

QQ plot from GEM association analysis of  $\gamma/\alpha$  tocopherol ratio

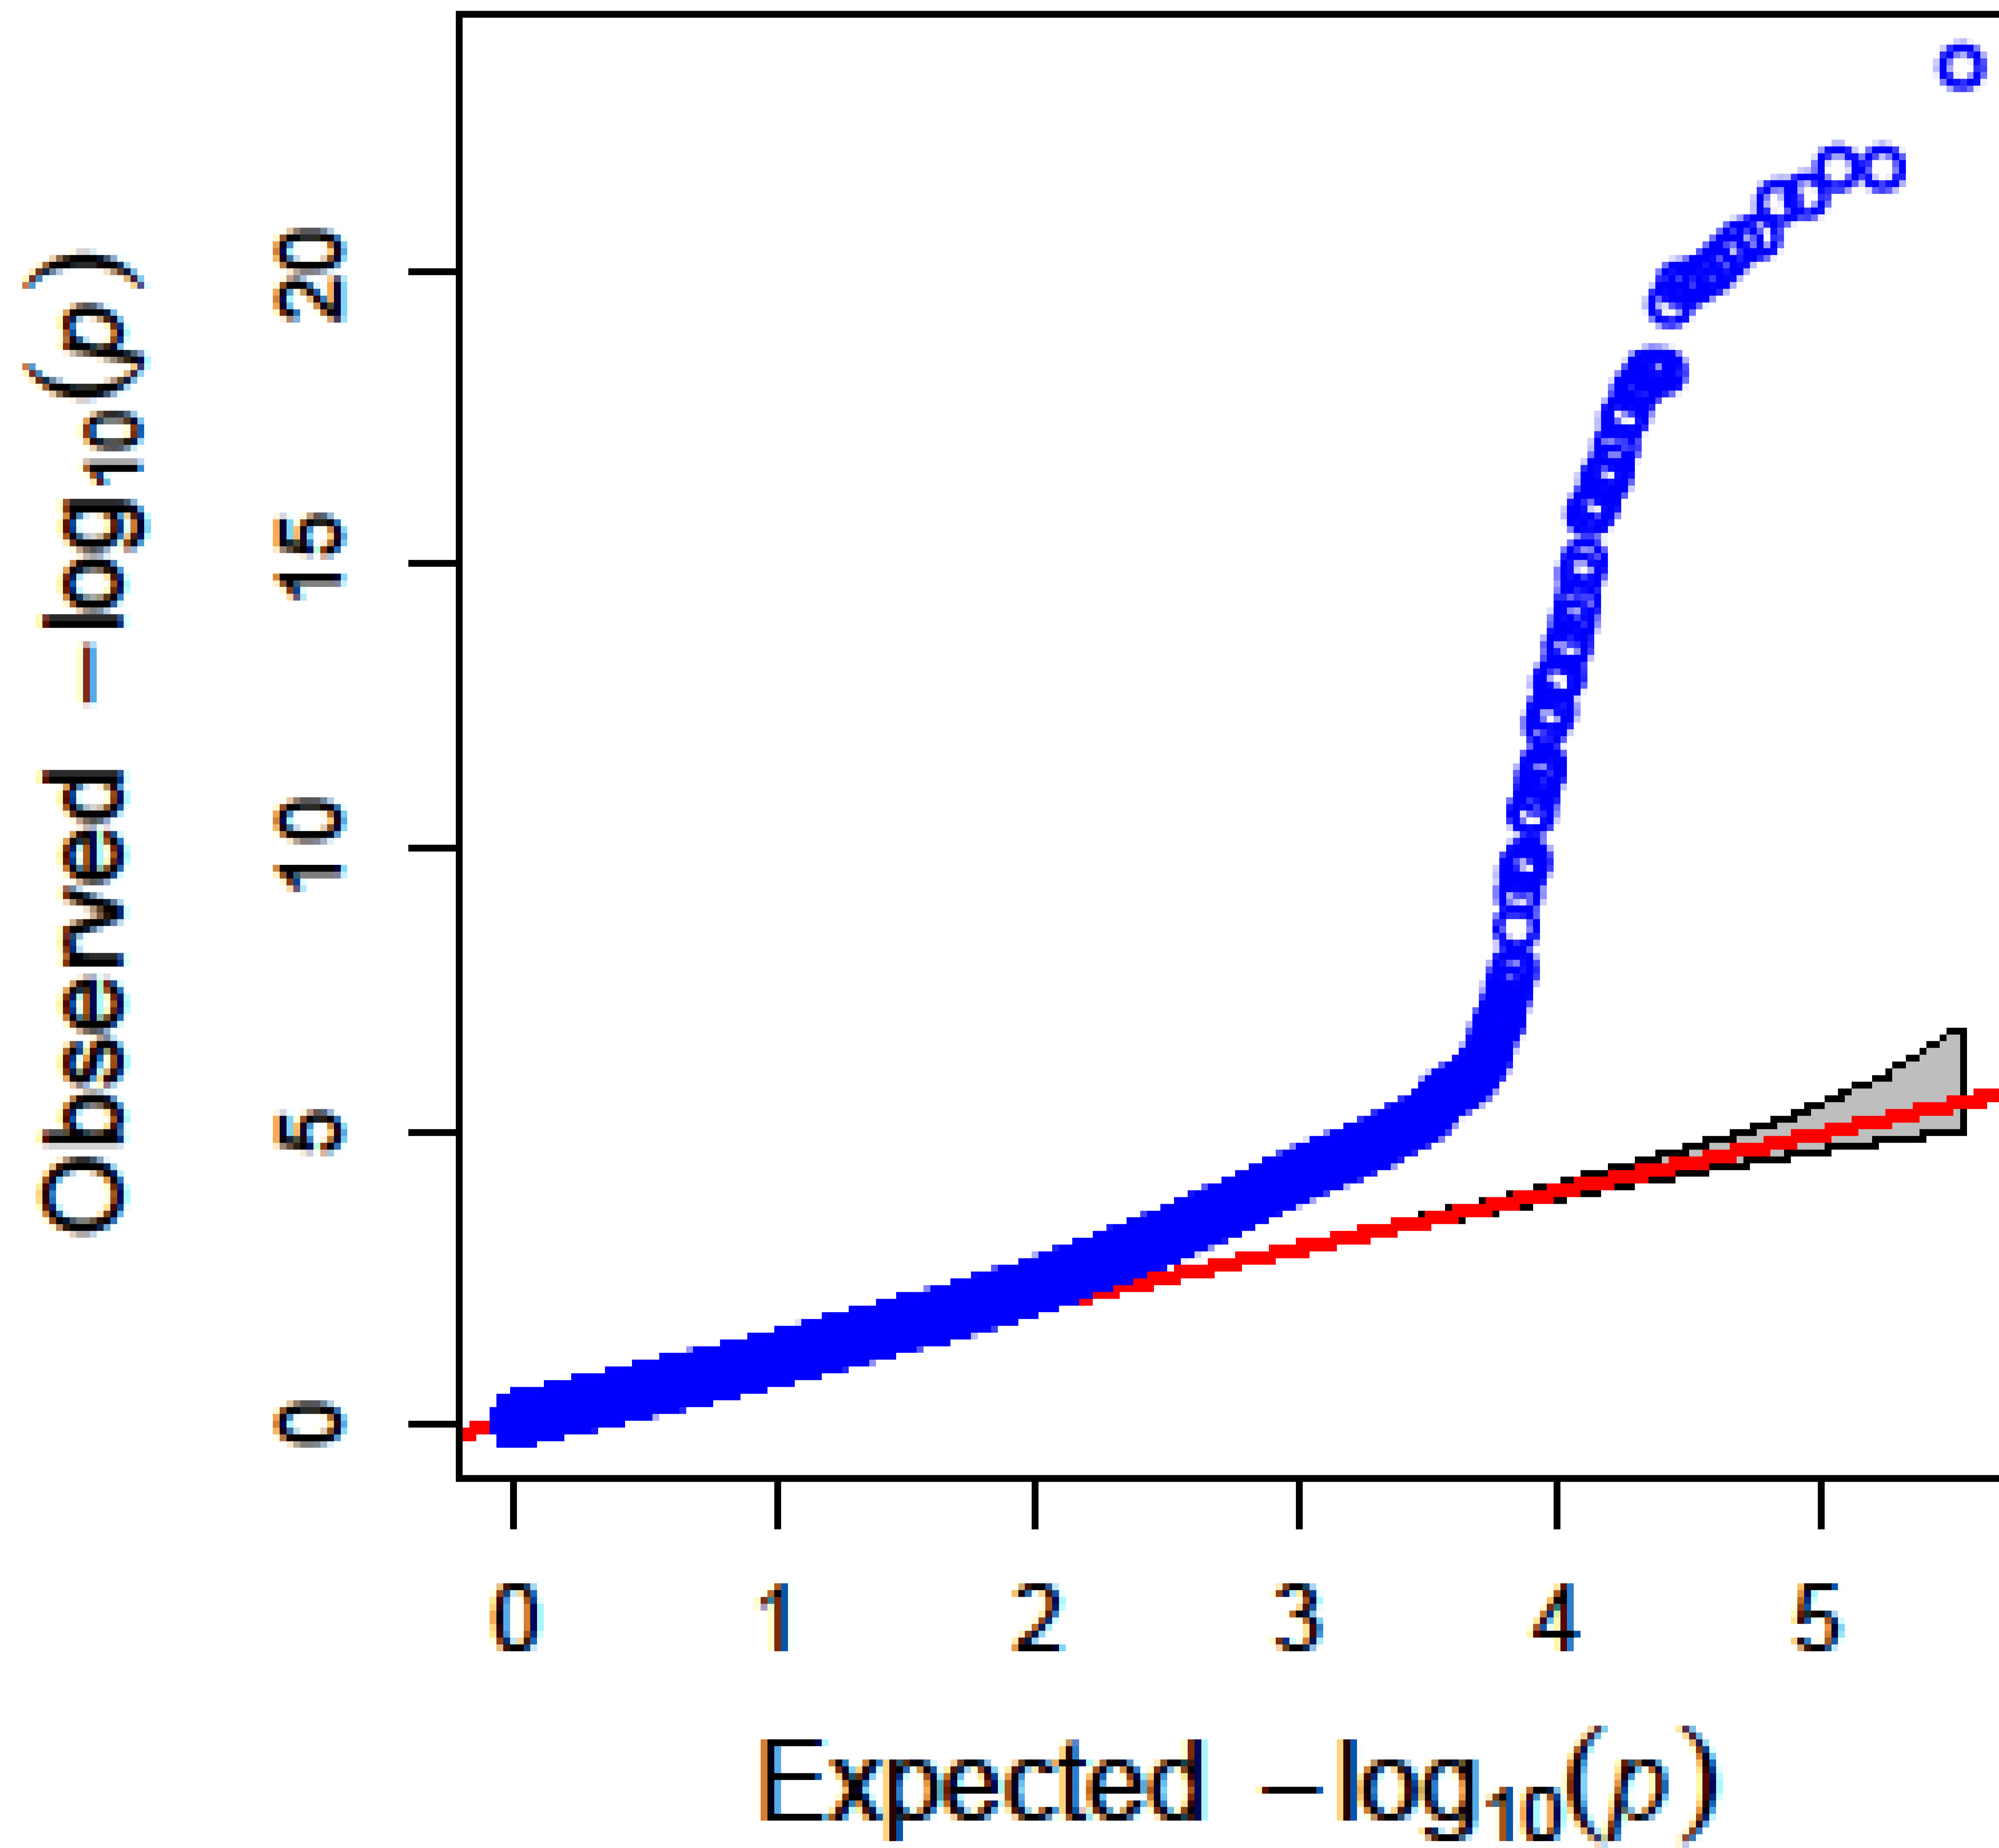

QQ plot from SNP association analysis of  $\gamma/\alpha$  tocopherol ratio



**Adjusted pvalues  
with lambda = 3.51021728668061**

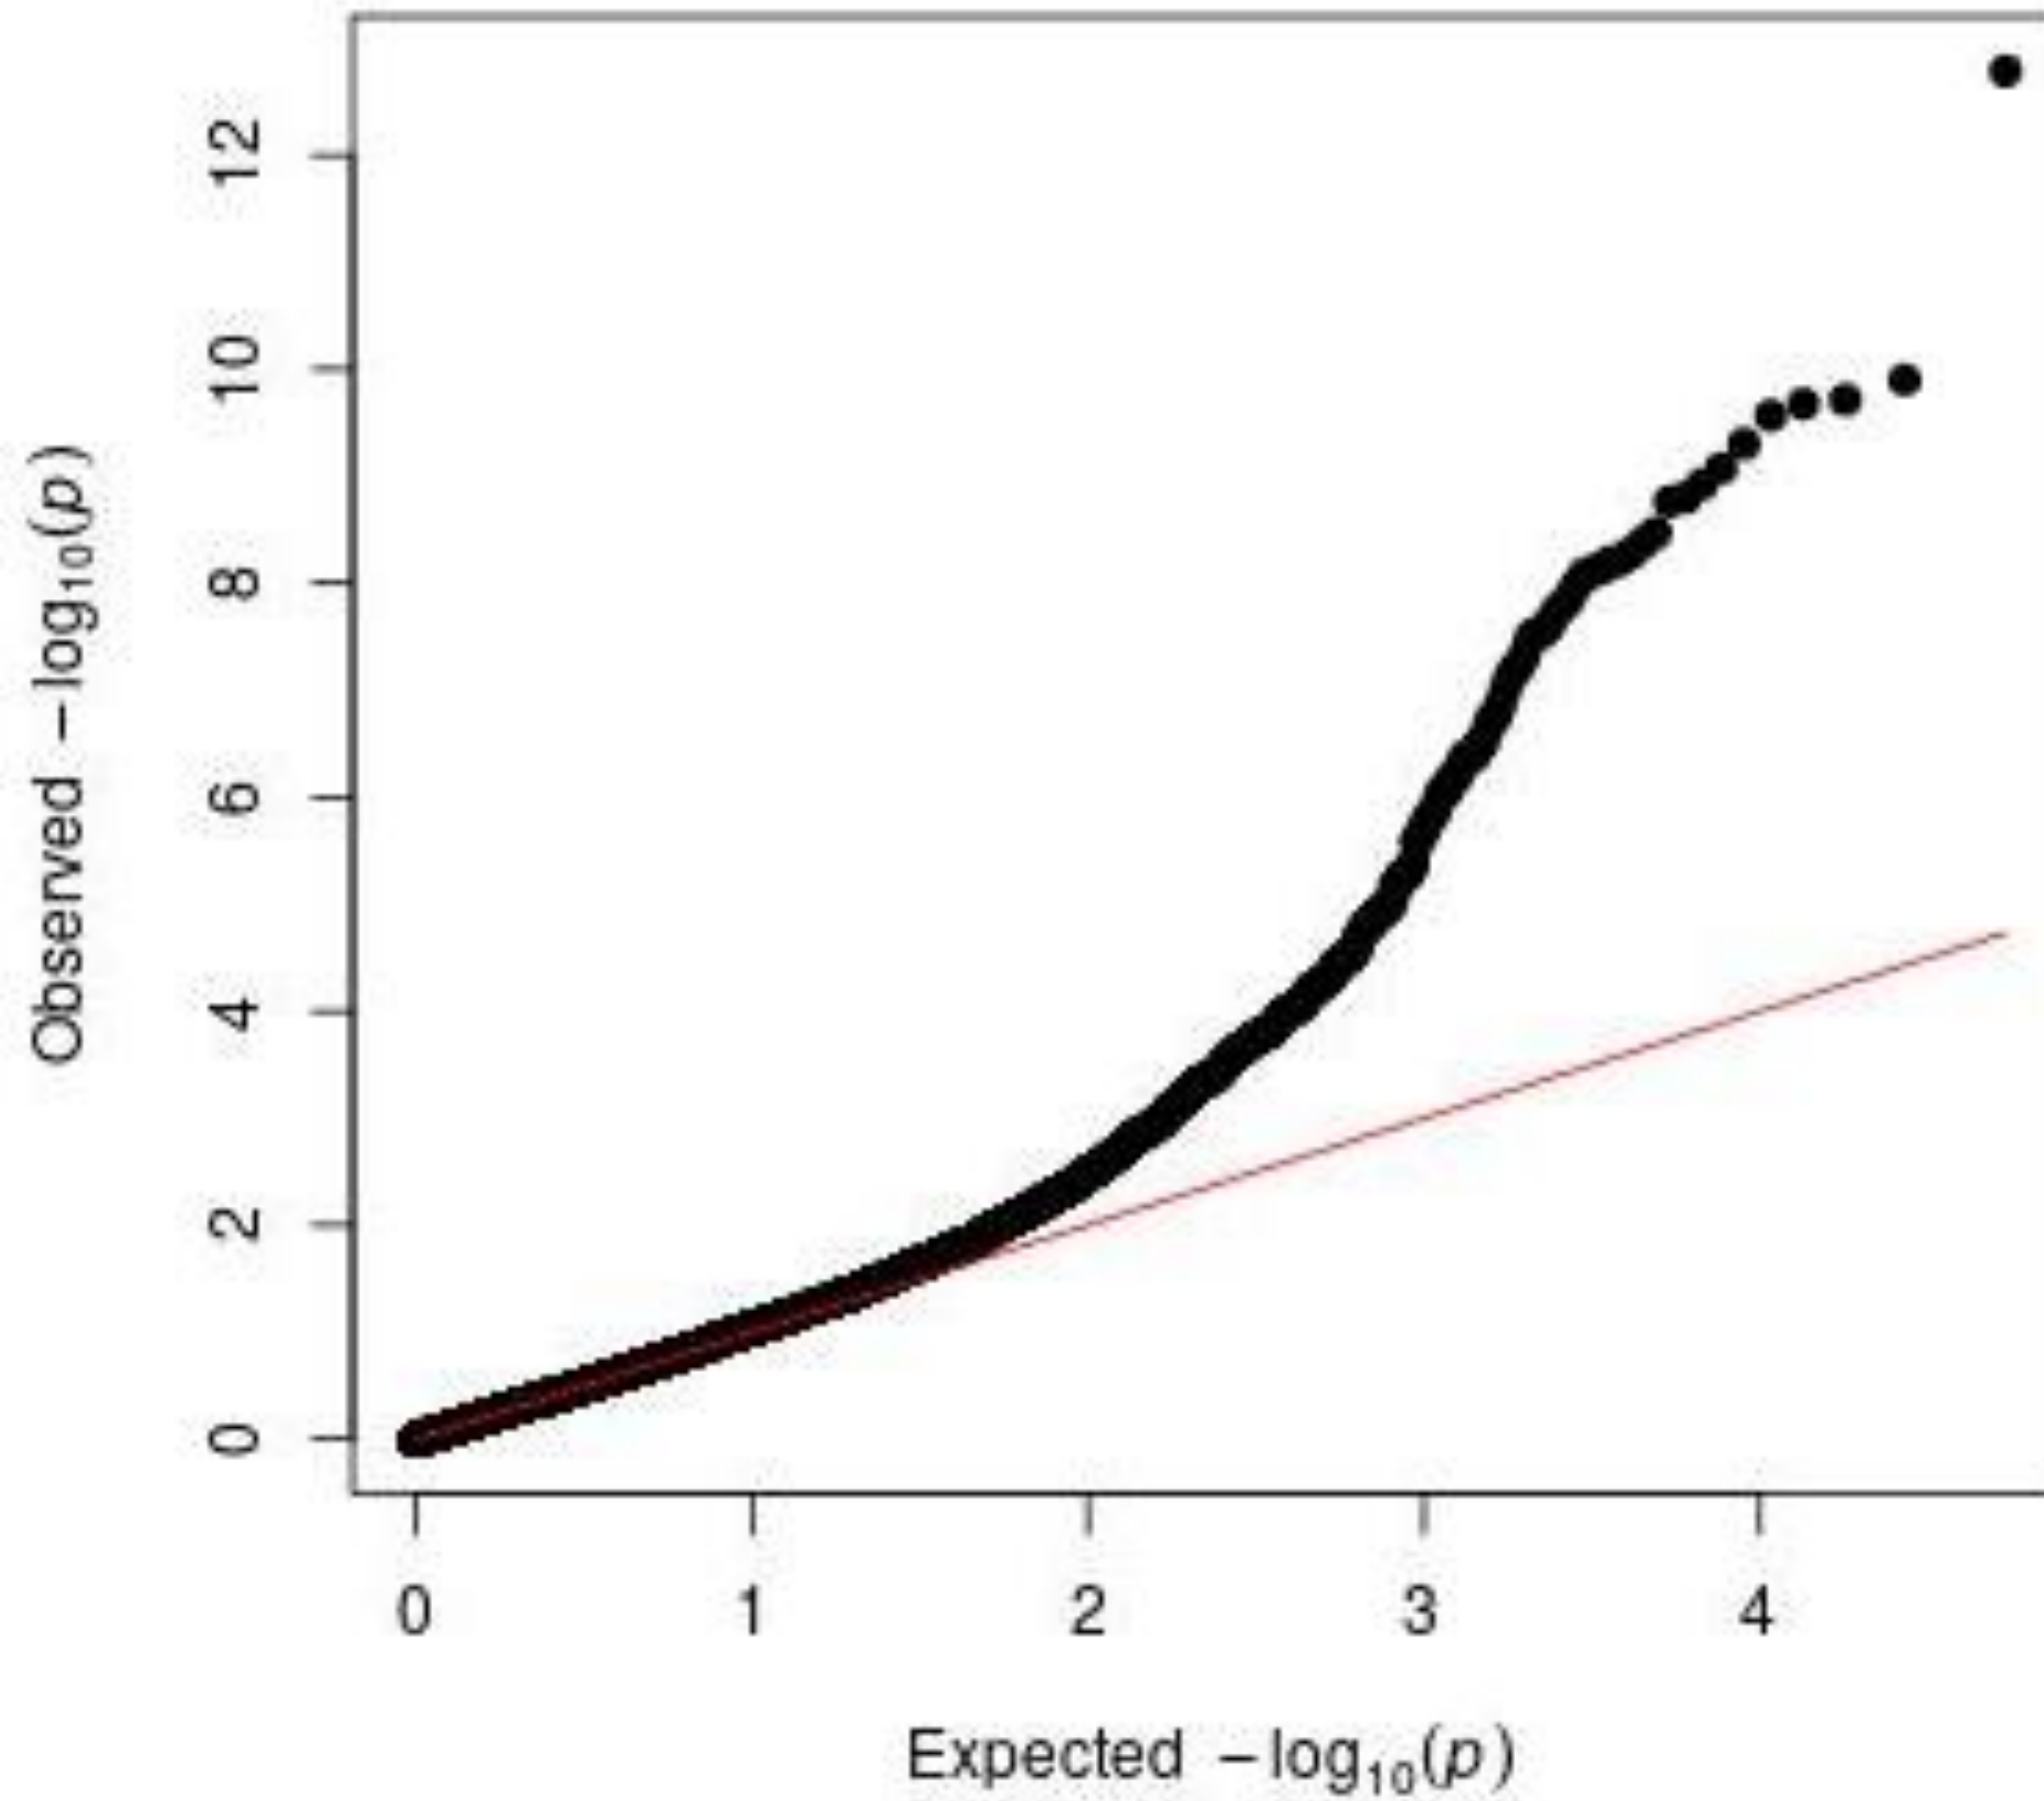

QQ plot from GEM association analysis of erucic acid

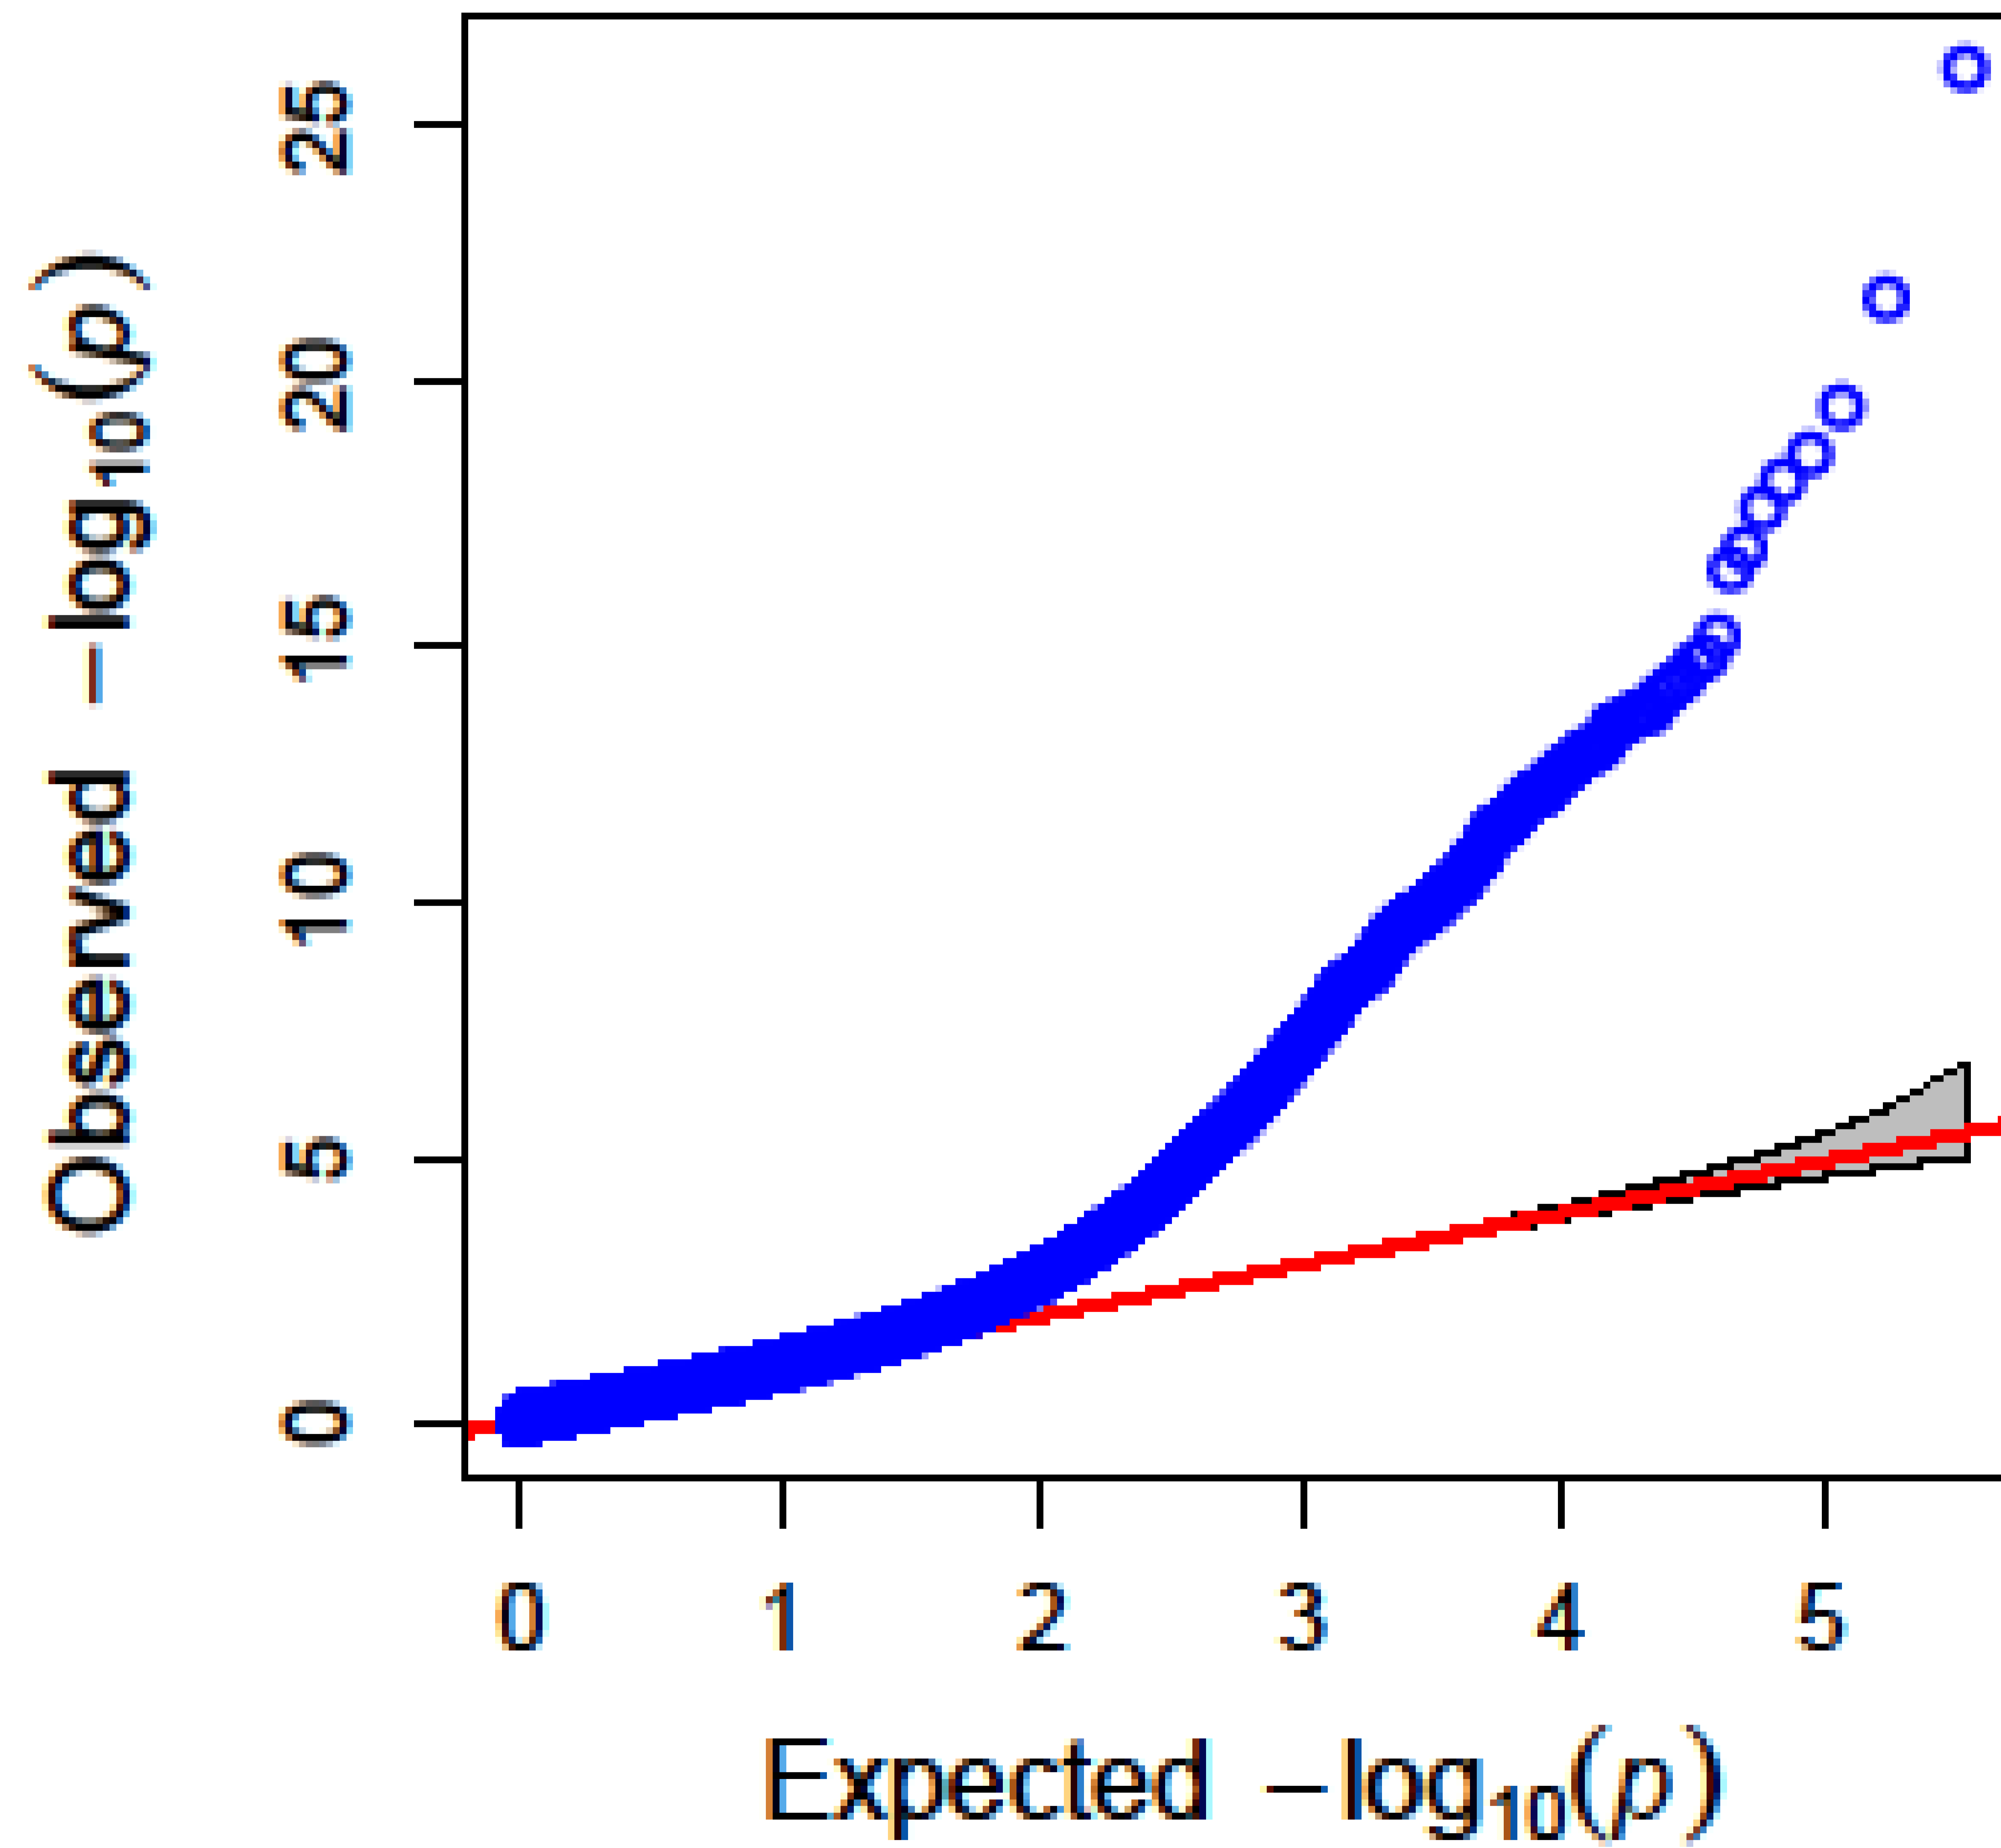

QQ plot from SNP association analysis of erucic acid
